# Supplementary material for: Azines possessing strong push–pull donors/acceptors
Source: Royal Society of Chemistry journal article supplement (doi:10.1039/b404129a), 2004-01-01
Supplement: b404129a.pdf [file b404129a.pdf]

# Supplementary Material (ESI) for Chemical Communications  
# This journal is © The Royal Society of Chemistry 2004

---

## **Azines Possessing Extreme Push/Pull Donors/Acceptors**

---

**Dharinee D. Choytun,<sup>a</sup> Lisa Langlois,<sup>a</sup> Thomas P. Johansson,<sup>a</sup> Charles L. B. Macdonald,<sup>b\*</sup> Gary W. Leach,<sup>a</sup> Noham Weinberg,<sup>a</sup> and Jason A. C. Clyburne<sup>a\*</sup>**

<sup>a</sup> *Department of Chemistry, Simon Fraser University, Burnaby BC V5A 1S6, Canada. E-mail: clyburne@sfu.ca*

<sup>b</sup> *Department of Chemistry and Biochemistry, University of Windsor, 401 Sunset Ave, Windsor ON N9B 3P4, Canada.*

## Supporting Information

### Table of Contents

|                                                                     |     |
|---------------------------------------------------------------------|-----|
| Synthesis of <b>2</b> .....                                         | 4   |
| Synthesis of <b>3</b> .....                                         | 4   |
| Synthesis of <b>4</b> .....                                         | 4   |
| Synthesis of <b>5</b> .....                                         | 6   |
| Synthesis of <b>6</b> .....                                         | 4   |
| Synthesis of <b>7</b> .....                                         | 7   |
| Synthesis of <b>10</b> .....                                        | 4   |
| Crystal Data of <b>2</b> .....                                      | 8   |
| Crystal Data of <b>3</b> .....                                      | 19  |
| Crystal Data of <b>4</b> .....                                      | 37  |
| Crystal Data of <b>5</b> .....                                      | 54  |
| Crystal Data of <b>6</b> .....                                      | 62  |
| Crystal Data of <b>7</b> .....                                      | 76  |
| Crystal Data of <b>10</b> .....                                     | 87  |
| Atomic Coordinates of <b>1</b> (Optimization with constraints)..... | 94  |
| Atomic Coordinates of <b>2</b> (Optimization with constraints)..... | 96  |
| Atomic Coordinates of <b>3</b> (Optimization with constraints)..... | 98  |
| Atomic Coordinates of <b>4</b> (Optimization with constraints)..... | 100 |
| Atomic Coordinates of <b>5</b> (Optimization with constraints)..... | 102 |
| Atomic Coordinates of <b>6</b> (Optimization with constraints)..... | 102 |
| Atomic Coordinates of <b>7</b> (Optimization with constraints)..... | 104 |
| Bond Length Correlation Plots.....                                  | 105 |
| Surface Second Harmonic Generation (SHG).....                       | 108 |

### **General procedures**

An MBraun UL-99-245 dry box and standard Schlenk techniques on a double manifold vacuum line were used in the manipulation of air and moisture sensitive compounds. NMR spectra were recorded on a Bruker AMX 400 or a Varian AS 500 spectrometer in five millimeter quartz tubes.  $^1\text{H}$  and  $^{13}\text{C}\{^1\text{H}\}$  chemical shifts are reported in parts per million (ppm) downfield from tetramethylsilane (TMS) and are calibrated to the residual signal of the solvent. Infrared spectra were obtained using a Bomem MB spectrometer with the % transmittance values reported in  $\text{cm}^{-1}$ . Melting points were measured using a Mel-Temp apparatus and are uncorrected. The high resolution mass spectra were obtained using a Kratos Concept double focussing mass spectrometer. Samples were run by electron impact and exact mass was obtained by peak matching using perfluorokerosene as a mass reference.

### Synthesis of azines:

Note: Compounds **1**, **2**, **3**, **4**, and **6** were prepared on similar scales and followed the same procedure as used for **2**. (J. M. Hopkins, M. Bowdridge, K. N. Robertson, T. S. Cameron, H. A. Jenkins and J. A. C. Clyburne, *J. Org. Chem*, 2001, **66**, 5713-5716.). Compound **10** was prepared following a literature procedure (H.H. Szmant and C. J. McGinnis *J. Am. Chem. Soc.* 1950, **72**, 2890-2892).

### Compound 1

<sup>1</sup>H NMR (400 MHz, CDCl<sub>3</sub>) δ 2.22 (s, 12H), 2.42 (s, 6H), 6.47 (dt,  $J_1 = 7.7$  Hz,  $J_2 = 1.1$  Hz, 1H), 6.49 (s, 2H), 6.94 - 6.99 (m, 2H), 7.03 (s, 4H), 7.11 (td,  $J_1 = 7.4$  Hz,  $J_2 = 1.1$  Hz, 1H), 7.16 (td,  $J_1 = 7.4$  Hz,  $J_2 = 1.1$  Hz, 1H), 7.51 (dt,  $J_1 = 7.4$  Hz,  $J_2 = 1.1$  Hz, 1H), 7.56 (dt,  $J_1 = 7.7$  Hz,  $J_2 = 1.1$  Hz, 1H), 7.97 (dt,  $J_1 = 7.7$  Hz,  $J_2 = 1.1$  Hz, 1H)

### Preparation of 2:

A solution of 1,3-*bis*-(2,4,6-trimethylphenyl)-imidazol-2-ylidene (0.22 g, 0.72 mmol) in 20 mL of tetrahydrofuran (THF) was added to a stirred solution of 2,7-dibromo-9-diazafluorene (0.25 g, 0.73 mmol) in 25 mL of THF at room temperature. The dark red solution was stirred for 3.5 h. Solvent was removed *in vacuo* and the red solid was recrystallised from dichloromethane and hexane to produce red/orange crystals of **2**.

### Characterisation Data

#### Compound 2

Red crystals ; Yield 0.4 g (79%) m.p. 260-262°C.

# Supplementary Material (ESI) for Chemical Communications  
# This journal is © The Royal Society of Chemistry 2004

$^1\text{H}$  NMR (400 MHz,  $\text{CDCl}_3$ )  $\delta$  2.21 (s, 12H), 2.45 (s, 6H), 6.57 (d,  $J = 1.9$ , 1H), 6.58 (s, 2H), 7.08 (s, 4H), 7.21 (dd,  $J_1 = 7.8$  Hz,  $J_2 = 1.9$  Hz, 1 H), 7.27 (dd,  $J_1 = 7.8$  Hz,  $J_2 = 1.9$  Hz, 1H), 7.34 (d,  $J = 7.8$  Hz, 1H), 7.39 (d,  $J = 7.8$  Hz, 1H), 8.10 (d,  $J = 1.9$  Hz, 1H).

$^{13}\text{C}$  NMR (400 MHz,  $\text{CDCl}_3$ )  $\delta$  18.3, 21.6, 120.3, 120.6, 120.8, 123.4, 128.8, 129.4, 129.9, 130.2, 132.3, 136.0, 136.7, 140.8, 143.5, 150.0

HRMS–EI ( $m/z$ ):  $[\text{M}]^+$  calculated for  $\text{C}_{34}\text{H}_{30}\text{N}_4\text{Br}_2$ , 652.0837; found 652.0848.

### Compound 3

Orange crystals ; Yield: 1.0 g (74%), m.p. 180-182 °C.

The crystal contains two isomeric forms of the molecule (determined by X-ray crystallography).

The  $^1\text{H}$  NMR intergrations are consistent with two isomers being present in *ca* equal amounts.

$^1\text{H}$  NMR (400 MHz,  $\text{CDCl}_3$ )  $\delta$  2.21 (s, 24 H), 2.42 (d,  $J = 4.3$  Hz, 12H), 6.06 (dd,  $J_1 = 9.8$ ,  $J_2 = 2.4$  Hz, 1 H), 6.48 (d,  $J = 7.6$  Hz, 1H), 6.53 (d,  $J = 5.2$  Hz, 4H), 6.75 – 6.86 (m, 2H), 6.92 – 6.99 (m, 2H), 7.04 (s, 8H), 7.08 – 7.17 (m, 2H), 7.41 – 7.52 (m, 4H), 7.61 (dd,  $J_1 = 10.1$  Hz,  $J_2 = 2.4$  Hz, 1 H), 7.91 (d, 1H)

$^{13}\text{C}$  NMR ( $\text{CDCl}_3$ ) the spectra obtained are complex due to the presence of two isomers in solutions as well as complex coupling between carbon and fluorine.

HRMS–EI ( $m/z$ ) :  $[\text{M}]^+$  calculated for  $\text{C}_{34}\text{H}_{31}\text{N}_4\text{F}$ , 514.2533; found 514.2532.

### Compound 4

Orange crystals ; Yield: 1.00 g (74.1 %), m.p. 180-182 °C.

# Supplementary Material (ESI) for Chemical Communications  
# This journal is © The Royal Society of Chemistry 2004

$^1\text{H}$  NMR (500 MHz,  $\text{CDCl}_3$ )  $\delta$  2.21 (s, 12H), 2.44 (s, 6H), 6.39 (d,  $J = 2.1$  Hz, 1H), 6.58 (broad s, 2H), 7.05 (dd,  $J_1 = 7.9$  Hz,  $J_2 = 2.1$  Hz, 1H), 7.07 (s, 4H), 7.11 (dd,  $J_1 = 7.9$  Hz,  $J_2 = 2.1$  Hz, 1H), 7.38 (d,  $J = 7.9$  Hz, 1H), 7.43 (d,  $J = 7.9$  Hz, 1H), 7.91 (d,  $J = 2.1$  Hz, 1H).

$^{13}\text{C}$  NMR (400 MHz,  $\text{CDCl}_3$ )  $\delta$  18.4, 21.5, 119.9, 120.2, 120.5, 126.0, 127.1, 127.4, 129.4, 129.6, 132.2, 132.4, 132.9, , 135.7, 136.3, 140.7, 143.8, 149.9.

HRMS–EI ( $m/z$ ):  $[\text{M}]^+$  calculated for  $\text{C}_{34}\text{H}_{30}\text{N}_4\text{Cl}_2$ , 564.1848; found 564.1848.

### Compound 6

Yield (0.81g, 29%), m.p. 167-169°C.

$^1\text{H}$  NMR (500 MHz,  $\text{CDCl}_3$ )  $\delta$  2.15 (s, 12H), 2.34 (s, 6H), 5.50-5.53 (m, 1H), 6.19-6.23 (m, 1H), 6.23-6.24 (m, 1H), 6.26-6.27 (m, 1H), 6.49 (s, 2H), 6.93 (s, 4H).

$^{13}\text{C}$  NMR (500 MHz,  $\text{CDCl}_3$ )  $\delta$  18.1, 21.0, 107.2, 116.4, 124.2, 128.5, 128.6, 130.5, 134.2, 135.4, 138.1, 150.3, 158.9.

HRMS–EI ( $m/z$ ):  $[\text{M}]^+$  calculated for  $\text{C}_{26}\text{H}_{28}\text{N}_4$ , 396.2314; found 396.2313.

### Compound 5

Prepared as for compound **2** except using 1,3-bis(isopropyl)-4,5-dimethylimidazole-2-ylidene

Reddish-orange crystals; Yield: 0.96 g, 48%. m.p. 151-153°C:

$^1\text{H}$  NMR (500 MHz,  $\text{C}_6\text{D}_6$ )  $\delta$  1.25 (d,  $J = 7$  Hz, 12H), 1.53 (s, 6H), 5.35 (broad, 2 H), 7.25 (t,  $J = 8$  Hz, 1H), 7.28 (t,  $J = 8$ , 1H), 7.37 (t,  $J = 8$  Hz, 1H), 7.50 (t,  $J = 8$  Hz, 1H), 7.74 (d,  $J = 8$  Hz, 1H), 7.78 (d,  $J = 8$  Hz, 1 H), 8.24 (d,  $J = 8$  Hz, 1H), 9.41 (d,  $J = 8$  Hz, 1H)

$^{13}\text{C}$  NMR (500 MHz,  $\text{C}_6\text{D}_6$ )  $\delta$  9.8, 21.4, 48.2, 118.4, 119.8, 119.9, 125.8, 126.8, 126.9, 127.1, 127.2, 128.3, 132.3, 138.3, 139.5, 140.7, 143.3, 152.8.

# Supplementary Material (ESI) for Chemical Communications  
# This journal is © The Royal Society of Chemistry 2004

MS  $m/z$  (relative intensity): 100% (373).

HRMS-EI ( $m/z$ ) :  $[M]^+$  calculated for  $C_{24}H_{28}N_4$ , 372.2314; found 372.2313.

### Preparation and Characterisation Data of Compound 7

A solution of fluorenone hydrazone (0.418 g, 2 mmol) and pyridine (0.15 ml, 2 mmol) in methanol (25 mL) was added dropwise to a solution of 2-methylthio-1,3 dithiolium iodide (0.6 g, 2 mmol) in methanol (20 mL) at 0°C under nitrogen. During the addition, an orange solid precipitated. The mixture was allowed to stir at room temperature for 2-3 hours. The solid was filtered, washed with cold methanol and dried. Recrystallisation from ether/benzene/hexane afforded reddish brown crystals (0.271 g, 46%) m.p. 150-152 °C.

$^1H$  NMR ( $CDCl_3$ )  $\delta$  6.65 (d,  $J = 7.3$  Hz, 1 H), 6.73 ( $J = 7.0$  Hz, 1H), 7.26-7.31 (m, 2H), 7.35-7.42 (m, 2H), 7.57-7.64 (m, 2H), 7.91 (d,  $J = 7.3$  Hz, 1H), 8.53 (d,  $J = 7.3$  Hz, 1H).

$^{13}C$  NMR (400 MHz,  $CDCl_3$ )  $\delta$  117.2, 120.0, 120.1, 120.3, 120.4, 123.1, 128.4, 130.1, 130.8, 131.2, 131.5, 131.6, 136.7, 141.5, 142.5, 155.1.

IR (KBr): 649, 726, 789, 930, 1093, 1306, 1431, 1594, 2921, 3053  $cm^{-1}$ .

MS  $m/z$  (relative intensity): 295 ( $M^+$ : 100%).

HRMS-EI ( $m/z$ ) :  $[M]^+$  calculated for  $C_{16}H_{10}N_2S_2$ , 294.0285; found 294.0286

**Table 1.** Crystal data and structure refinement for **2**

|                                   |                                                                |                  |
|-----------------------------------|----------------------------------------------------------------|------------------|
| Identification code               | <b>2</b>                                                       |                  |
| Empirical formula                 | C <sub>34</sub> H <sub>30</sub> Br <sub>2</sub> N <sub>4</sub> |                  |
| Formula weight                    | 654.44                                                         |                  |
| Temperature                       | 173(2) K                                                       |                  |
| Wavelength                        | 0.71073 Å                                                      |                  |
| Crystal system                    | Monoclinic                                                     |                  |
| Space group                       | P2(1)/c                                                        |                  |
| Unit cell dimensions              | a = 11.1477(7) Å                                               | α = 90°.         |
|                                   | b = 20.9731(13) Å                                              | β = 113.242(2)°. |
|                                   | c = 14.0060(8) Å                                               | γ = 90°.         |
| Volume                            | 3008.9(3) Å <sup>3</sup>                                       |                  |
| Z                                 | 4                                                              |                  |
| Density (calculated)              | 1.445 Mg/m <sup>3</sup>                                        |                  |
| Absorption coefficient            | 2.724 mm <sup>-1</sup>                                         |                  |
| F(000)                            | 1328                                                           |                  |
| Crystal size                      | 0.4 x 0.3 x 0.1 mm <sup>3</sup>                                |                  |
| Theta range for data collection   | 1.86 to 27.53°.                                                |                  |
| Index ranges                      | -14 ≤ h ≤ 14, -27 ≤ k ≤ 27, -18 ≤ l ≤ 18                       |                  |
| Reflections collected             | 28975                                                          |                  |
| Independent reflections           | 6935 [R(int) = 0.1293]                                         |                  |
| Completeness to theta = 27.53°    | 99.8 %                                                         |                  |
| Absorption correction             | None                                                           |                  |
| Refinement method                 | Full-matrix least-squares on F <sup>2</sup>                    |                  |
| Data / restraints / parameters    | 6935 / 0 / 361                                                 |                  |
| Goodness-of-fit on F <sup>2</sup> | 1.039                                                          |                  |
| Final R indices [I > 2σ(I)]       | R1 = 0.0845, wR2 = 0.1859                                      |                  |
| R indices (all data)              | R1 = 0.1996, wR2 = 0.2282                                      |                  |
| Largest diff. peak and hole       | 2.164 and -0.784 e.Å <sup>-3</sup>                             |                  |



# Supplementary Material (ESI) for Chemical Communications  
# This journal is © The Royal Society of Chemistry 2004

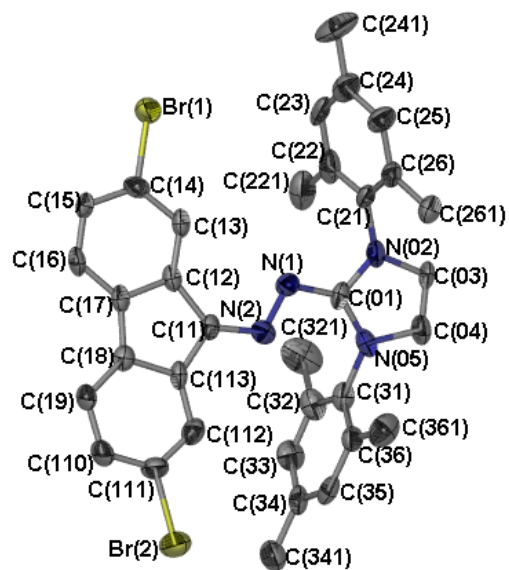

ORTEP Diagram of 2

Hydrogen atoms are removed for clarity. Thermal ellipsoids are shown at 50% probability level.

**Table 2.** Atomic coordinates ( $\times 10^4$ ) and equivalent isotropic displacement parameters ( $\text{\AA}^2 \times 10^3$ ) for **2** U(eq) is defined as one third of the trace of the orthogonalized  $U^{ij}$  tensor.

|        | x        | y       | z        | U(eq) |
|--------|----------|---------|----------|-------|
| C(01)  | 3267(7)  | 851(3)  | 1859(6)  | 39(2) |
| C(03)  | 2031(7)  | 421(4)  | 2611(6)  | 46(2) |
| C(04)  | 1354(8)  | 385(4)  | 1585(6)  | 51(2) |
| C(11)  | 5106(7)  | 1566(3) | 722(5)   | 35(2) |
| C(12)  | 6507(7)  | 1674(3) | 1436(5)  | 36(2) |
| C(13)  | 7166(7)  | 1550(3) | 2467(6)  | 40(2) |
| C(14)  | 8482(8)  | 1716(4) | 2921(5)  | 45(2) |
| C(15)  | 9133(7)  | 2007(3) | 2365(6)  | 41(2) |
| C(16)  | 8436(7)  | 2139(3) | 1321(6)  | 44(2) |
| C(17)  | 7114(7)  | 1979(3) | 839(6)   | 38(2) |
| C(18)  | 6170(7)  | 2057(3) | -217(6)  | 39(2) |
| C(19)  | 6248(8)  | 2329(4) | -1087(6) | 45(2) |
| C(21)  | 4221(7)  | 874(4)  | 3787(6)  | 45(2) |
| C(22)  | 5407(9)  | 546(4)  | 4129(7)  | 58(2) |
| C(23)  | 6344(8)  | 737(5)  | 5107(7)  | 64(3) |
| C(24)  | 6104(9)  | 1195(4) | 5706(7)  | 60(2) |
| C(25)  | 4909(8)  | 1492(4) | 5319(7)  | 56(2) |
| C(26)  | 3961(7)  | 1335(4) | 4355(6)  | 45(2) |
| C(31)  | 1796(7)  | 590(3)  | 7(6)     | 43(2) |
| C(32)  | 2360(8)  | 93(4)   | -332(6)  | 52(2) |
| C(33)  | 2050(8)  | 33(4)   | -1378(6) | 56(2) |
| C(34)  | 1172(8)  | 442(4)  | -2106(6) | 48(2) |
| C(35)  | 643(7)   | 931(4)  | -1733(6) | 47(2) |
| C(36)  | 926(7)   | 1012(4) | -677(6)  | 42(2) |
| C(110) | 5138(8)  | 2341(4) | -2018(6) | 54(2) |
| C(111) | 3992(8)  | 2079(4) | -2062(6) | 50(2) |
| C(112) | 3863(8)  | 1804(4) | -1237(6) | 49(2) |
| C(113) | 4946(7)  | 1800(3) | -288(6)  | 37(2) |
| C(221) | 5685(9)  | 23(5)   | 3514(8)  | 77(3) |
| C(241) | 7129(10) | 1359(5) | 6765(8)  | 96(4) |

# Supplementary Material (ESI) for Chemical Communications  
# This journal is © The Royal Society of Chemistry 2004

|        |          |         |          |       |
|--------|----------|---------|----------|-------|
| C(261) | 2668(7)  | 1687(4) | 3941(6)  | 54(2) |
| C(321) | 3356(11) | -344(4) | 452(7)   | 85(3) |
| C(341) | 855(9)   | 365(4)  | -3253(6) | 66(3) |
| C(361) | 348(9)   | 1549(4) | -311(7)  | 69(3) |
| N(1)   | 4357(6)  | 1135(3) | 1827(4)  | 42(2) |
| N(2)   | 4088(6)  | 1318(3) | 863(4)   | 40(2) |
| N(02)  | 3243(6)  | 703(3)  | 2783(5)  | 44(2) |
| N(05)  | 2128(6)  | 655(3)  | 1105(5)  | 43(2) |
| Br(1)  | 9423(1)  | 1539(1) | 4355(1)  | 56(1) |
| Br(2)  | 2498(1)  | 2098(1) | -3348(1) | 75(1) |

---

**Table 3.** Bond lengths [Å] and angles [°] for **2**.

---

|              |           |
|--------------|-----------|
| C(01)-N(02)  | 1.342(9)  |
| C(01)-N(05)  | 1.356(9)  |
| C(01)-N(1)   | 1.370(9)  |
| C(03)-C(04)  | 1.335(10) |
| C(03)-N(02)  | 1.405(9)  |
| C(04)-N(05)  | 1.406(9)  |
| C(11)-N(2)   | 1.331(9)  |
| C(11)-C(113) | 1.440(10) |
| C(11)-C(12)  | 1.503(10) |
| C(12)-C(13)  | 1.363(10) |
| C(12)-C(17)  | 1.419(9)  |
| C(13)-C(14)  | 1.393(10) |
| C(14)-C(15)  | 1.398(10) |
| C(14)-Br(1)  | 1.900(7)  |
| C(15)-C(16)  | 1.385(10) |
| C(16)-C(17)  | 1.398(10) |
| C(17)-C(18)  | 1.447(10) |
| C(18)-C(19)  | 1.378(9)  |
| C(18)-C(113) | 1.434(9)  |
| C(19)-C(110) | 1.400(11) |
| C(21)-C(26)  | 1.354(10) |
| C(21)-C(22)  | 1.397(11) |
| C(21)-N(02)  | 1.444(9)  |
| C(22)-C(23)  | 1.414(12) |
| C(22)-C(221) | 1.501(12) |
| C(23)-C(24)  | 1.371(13) |
| C(24)-C(25)  | 1.372(12) |
| C(24)-C(241) | 1.511(12) |
| C(25)-C(26)  | 1.386(10) |
| C(26)-C(261) | 1.517(10) |
| C(31)-C(36)  | 1.383(10) |
| C(31)-C(32)  | 1.395(10) |
| C(31)-N(05)  | 1.438(9)  |

# Supplementary Material (ESI) for Chemical Communications  
# This journal is © The Royal Society of Chemistry 2004

|                    |           |
|--------------------|-----------|
| C(32)-C(33)        | 1.371(11) |
| C(32)-C(321)       | 1.521(11) |
| C(33)-C(34)        | 1.396(11) |
| C(34)-C(35)        | 1.384(10) |
| C(34)-C(341)       | 1.511(10) |
| C(35)-C(36)        | 1.396(10) |
| C(36)-C(361)       | 1.485(10) |
| C(110)-C(111)      | 1.370(11) |
| C(111)-C(112)      | 1.348(10) |
| C(111)-Br(2)       | 1.912(8)  |
| C(112)-C(113)      | 1.399(10) |
| N(1)-N(2)          | 1.319(7)  |
|                    |           |
| N(02)-C(01)-N(05)  | 108.2(6)  |
| N(02)-C(01)-N(1)   | 119.3(7)  |
| N(05)-C(01)-N(1)   | 132.5(7)  |
| C(04)-C(03)-N(02)  | 107.8(6)  |
| C(03)-C(04)-N(05)  | 107.4(7)  |
| N(2)-C(11)-C(113)  | 119.8(6)  |
| N(2)-C(11)-C(12)   | 133.0(6)  |
| C(113)-C(11)-C(12) | 107.2(6)  |
| C(13)-C(12)-C(17)  | 121.9(7)  |
| C(13)-C(12)-C(11)  | 131.3(6)  |
| C(17)-C(12)-C(11)  | 106.8(6)  |
| C(12)-C(13)-C(14)  | 117.8(7)  |
| C(13)-C(14)-C(15)  | 122.7(7)  |
| C(13)-C(14)-Br(1)  | 118.5(6)  |
| C(15)-C(14)-Br(1)  | 118.9(6)  |
| C(16)-C(15)-C(14)  | 118.5(7)  |
| C(15)-C(16)-C(17)  | 120.5(7)  |
| C(16)-C(17)-C(12)  | 118.7(7)  |
| C(16)-C(17)-C(18)  | 132.1(6)  |
| C(12)-C(17)-C(18)  | 109.2(6)  |
| C(19)-C(18)-C(113) | 119.0(7)  |
| C(19)-C(18)-C(17)  | 132.5(7)  |

# Supplementary Material (ESI) for Chemical Communications  
# This journal is © The Royal Society of Chemistry 2004

|                      |           |
|----------------------|-----------|
| C(113)-C(18)-C(17)   | 108.4(6)  |
| C(18)-C(19)-C(110)   | 119.4(7)  |
| C(26)-C(21)-C(22)    | 122.9(8)  |
| C(26)-C(21)-N(02)    | 119.7(7)  |
| C(22)-C(21)-N(02)    | 117.4(8)  |
| C(21)-C(22)-C(23)    | 115.5(8)  |
| C(21)-C(22)-C(221)   | 123.0(9)  |
| C(23)-C(22)-C(221)   | 121.5(8)  |
| C(24)-C(23)-C(22)    | 122.9(8)  |
| C(25)-C(24)-C(23)    | 118.0(9)  |
| C(25)-C(24)-C(241)   | 121.7(10) |
| C(23)-C(24)-C(241)   | 120.3(9)  |
| C(24)-C(25)-C(26)    | 121.7(9)  |
| C(21)-C(26)-C(25)    | 119.0(7)  |
| C(21)-C(26)-C(261)   | 121.0(7)  |
| C(25)-C(26)-C(261)   | 120.0(7)  |
| C(36)-C(31)-C(32)    | 122.0(7)  |
| C(36)-C(31)-N(05)    | 119.6(6)  |
| C(32)-C(31)-N(05)    | 118.3(7)  |
| C(33)-C(32)-C(31)    | 118.3(8)  |
| C(33)-C(32)-C(321)   | 121.4(7)  |
| C(31)-C(32)-C(321)   | 120.2(7)  |
| C(32)-C(33)-C(34)    | 122.3(8)  |
| C(35)-C(34)-C(33)    | 117.4(7)  |
| C(35)-C(34)-C(341)   | 121.6(8)  |
| C(33)-C(34)-C(341)   | 121.0(7)  |
| C(34)-C(35)-C(36)    | 122.6(7)  |
| C(31)-C(36)-C(35)    | 117.4(7)  |
| C(31)-C(36)-C(361)   | 121.8(7)  |
| C(35)-C(36)-C(361)   | 120.8(7)  |
| C(111)-C(110)-C(19)  | 120.0(7)  |
| C(112)-C(111)-C(110) | 123.1(7)  |
| C(112)-C(111)-Br(2)  | 118.0(6)  |
| C(110)-C(111)-Br(2)  | 118.9(6)  |
| C(111)-C(112)-C(113) | 118.2(7)  |

# Supplementary Material (ESI) for Chemical Communications  
# This journal is © The Royal Society of Chemistry 2004

|                     |          |
|---------------------|----------|
| C(112)-C(113)-C(18) | 120.2(6) |
| C(112)-C(113)-C(11) | 131.4(6) |
| C(18)-C(113)-C(11)  | 108.4(6) |
| N(2)-N(1)-C(01)     | 108.3(6) |
| N(1)-N(2)-C(11)     | 113.8(6) |
| C(01)-N(02)-C(03)   | 108.4(6) |
| C(01)-N(02)-C(21)   | 125.9(6) |
| C(03)-N(02)-C(21)   | 125.3(6) |
| C(01)-N(05)-C(04)   | 108.2(6) |
| C(01)-N(05)-C(31)   | 129.0(6) |
| C(04)-N(05)-C(31)   | 121.6(6) |

---

Symmetry transformations used to generate equivalent atoms:

**Table 4.** Anisotropic displacement parameters ( $\text{\AA}^2 \times 10^3$ ) for **2**. The anisotropic displacement factor exponent takes the form:  $-2\pi^2 [h^2 a^* 2 U^{11} + \dots + 2 h k a^* b^* U^{12}]$

|        | U <sup>11</sup> | U <sup>22</sup> | U <sup>33</sup> | U <sup>23</sup> | U <sup>13</sup> | U <sup>12</sup> |
|--------|-----------------|-----------------|-----------------|-----------------|-----------------|-----------------|
| C(01)  | 28(4)           | 33(4)           | 61(5)           | -6(4)           | 23(4)           | -1(3)           |
| C(03)  | 30(4)           | 61(5)           | 56(5)           | 3(4)            | 26(4)           | -11(4)          |
| C(04)  | 50(5)           | 54(5)           | 62(6)           | 8(4)            | 34(5)           | -8(4)           |
| C(11)  | 33(4)           | 32(4)           | 47(4)           | -5(3)           | 23(3)           | -1(3)           |
| C(12)  | 42(4)           | 29(4)           | 47(4)           | 2(3)            | 29(4)           | 1(3)            |
| C(13)  | 38(4)           | 36(4)           | 56(5)           | 1(4)            | 31(4)           | 0(4)            |
| C(14)  | 49(5)           | 52(5)           | 33(4)           | 10(4)           | 15(4)           | 25(4)           |
| C(15)  | 29(4)           | 50(5)           | 50(5)           | 0(4)            | 22(4)           | 6(3)            |
| C(16)  | 45(5)           | 43(5)           | 59(5)           | 8(4)            | 37(4)           | -1(4)           |
| C(17)  | 40(4)           | 34(4)           | 52(5)           | 0(3)            | 31(4)           | 2(3)            |
| C(18)  | 39(4)           | 33(4)           | 49(4)           | -2(3)           | 22(4)           | 0(3)            |
| C(19)  | 44(5)           | 47(5)           | 50(5)           | 6(4)            | 25(4)           | -17(4)          |
| C(21)  | 22(4)           | 63(5)           | 46(5)           | 17(4)           | 11(4)           | 0(4)            |
| C(22)  | 54(6)           | 52(5)           | 85(7)           | 24(5)           | 43(5)           | 7(4)            |
| C(23)  | 23(4)           | 90(7)           | 76(6)           | 43(6)           | 16(5)           | 3(5)            |
| C(24)  | 48(6)           | 55(5)           | 70(6)           | 16(5)           | 16(5)           | -8(5)           |
| C(25)  | 42(5)           | 55(5)           | 62(5)           | 14(4)           | 9(4)            | 2(4)            |
| C(26)  | 35(4)           | 52(5)           | 49(5)           | 9(4)            | 19(4)           | -6(4)           |
| C(31)  | 44(5)           | 30(4)           | 62(5)           | 1(4)            | 29(4)           | 0(4)            |
| C(32)  | 67(6)           | 34(4)           | 67(6)           | 0(4)            | 39(5)           | -2(4)           |
| C(33)  | 65(6)           | 47(5)           | 64(6)           | -10(4)          | 34(5)           | 8(4)            |
| C(34)  | 40(5)           | 53(5)           | 60(5)           | -9(4)           | 31(4)           | -12(4)          |
| C(35)  | 28(4)           | 43(5)           | 69(6)           | 7(4)            | 17(4)           | -6(3)           |
| C(36)  | 39(4)           | 46(5)           | 46(5)           | -6(4)           | 22(4)           | -4(4)           |
| C(110) | 56(5)           | 63(6)           | 47(5)           | 7(4)            | 25(4)           | -23(4)          |
| C(111) | 50(5)           | 54(5)           | 40(4)           | 7(4)            | 11(4)           | -2(4)           |
| C(112) | 40(5)           | 48(5)           | 58(5)           | -8(4)           | 19(4)           | -12(4)          |
| C(113) | 37(4)           | 29(4)           | 58(5)           | -5(3)           | 32(4)           | -6(3)           |
| C(221) | 67(7)           | 68(7)           | 111(8)          | 21(6)           | 52(6)           | 10(5)           |
| C(241) | 58(6)           | 77(7)           | 100(8)          | 17(6)           | -24(6)          | -21(5)          |



# Supplementary Material (ESI) for Chemical Communications  
# This journal is © The Royal Society of Chemistry 2004

|        |         |       |       |        |       |        |
|--------|---------|-------|-------|--------|-------|--------|
| C(261) | 38(5)   | 65(6) | 62(5) | 0(4)   | 22(4) | 1(4)   |
| C(321) | 129(10) | 45(6) | 89(7) | 8(5)   | 50(7) | 46(6)  |
| C(341) | 69(6)   | 73(6) | 63(6) | -5(5)  | 36(5) | -12(5) |
| C(361) | 54(6)   | 63(6) | 88(7) | -15(5) | 25(5) | 13(5)  |
| N(1)   | 37(4)   | 45(4) | 42(4) | 3(3)   | 13(3) | 7(3)   |
| N(2)   | 48(4)   | 35(3) | 39(4) | 0(3)   | 20(3) | 9(3)   |
| N(02)  | 39(4)   | 48(4) | 53(4) | 7(3)   | 28(3) | -1(3)  |
| N(05)  | 57(4)   | 39(4) | 48(4) | 1(3)   | 36(4) | 0(3)   |
| Br(1)  | 49(1)   | 71(1) | 50(1) | 13(1)  | 20(1) | 13(1)  |
| Br(2)  | 61(1)   | 94(1) | 56(1) | 9(1)   | 7(1)  | -18(1) |

---

**Table 5.** Hydrogen coordinates ( $\times 10^4$ ) and isotropic displacement parameters ( $\text{\AA}^2 \times 10^3$ ) for **2**.

|        | x     | y    | z     | U(eq) |
|--------|-------|------|-------|-------|
| H(03)  | 1750  | 284  | 3120  | 56    |
| H(04)  | 523   | 213  | 1250  | 62    |
| H(13)  | 6751  | 1361 | 2855  | 48    |
| H(15)  | 10014 | 2111 | 2688  | 50    |
| H(16)  | 8851  | 2334 | 939   | 53    |
| H(19)  | 7030  | 2503 | -1055 | 54    |
| H(23)  | 7161  | 543  | 5354  | 76    |
| H(25)  | 4731  | 1805 | 5714  | 68    |
| H(33)  | 2438  | -291 | -1609 | 67    |
| H(35)  | 76    | 1217 | -2205 | 57    |
| H(110) | 5179  | 2527 | -2608 | 64    |
| H(112) | 3076  | 1622 | -1298 | 58    |
| H(22A) | 4938  | -40  | 2876  | 115   |
| H(22B) | 5871  | -365 | 3910  | 115   |
| H(22C) | 6424  | 138  | 3362  | 115   |
| H(24A) | 6808  | 1691 | 7072  | 143   |
| H(24B) | 7908  | 1501 | 6693  | 143   |
| H(24C) | 7322  | 988  | 7201  | 143   |
| H(26A) | 2656  | 1994 | 4445  | 81    |
| H(26B) | 1968  | 1388 | 3809  | 81    |
| H(26C) | 2562  | 1901 | 3307  | 81    |
| H(32A) | 3448  | -230 | 1141  | 128   |
| H(32B) | 4183  | -299 | 396   | 128   |
| H(32C) | 3067  | -778 | 314   | 128   |
| H(34A) | 1315  | 3    | -3360 | 98    |
| H(34B) | 1117  | 742  | -3511 | 98    |
| H(34C) | -67   | 302  | -3619 | 98    |
| H(36A) | -226  | 1788 | -898  | 104   |
| H(36B) | 1032  | 1822 | 133   | 104   |

H(36C) -136 1383 69 104

**Table 1.** Crystal data and structure refinement for **3**.

|                                   |                                                  |                   |  |
|-----------------------------------|--------------------------------------------------|-------------------|--|
| Identification code               | <b>3</b>                                         |                   |  |
| Empirical formula                 | C <sub>37</sub> H <sub>34</sub> F N <sub>4</sub> |                   |  |
| Formula weight                    | 553.68                                           |                   |  |
| Temperature                       | 173(2) K                                         |                   |  |
| Wavelength                        | 0.71073 Å                                        |                   |  |
| Crystal system                    | Triclinic                                        |                   |  |
| Space group                       | P-1                                              |                   |  |
| Unit cell dimensions              | a = 10.5060(6) Å                                 | α = 80.3250(10)°. |  |
|                                   | b = 11.5012(7) Å                                 | β = 81.3250(10)°. |  |
|                                   | c = 25.6373(16) Å                                | γ = 89.4250(10)°. |  |
| Volume                            | 3018.4(3) Å <sup>3</sup>                         |                   |  |
| Z                                 | 4                                                |                   |  |
| Density (calculated)              | 1.218 Mg/m <sup>3</sup>                          |                   |  |
| Absorption coefficient            | 0.076 mm <sup>-1</sup>                           |                   |  |
| F(000)                            | 1172                                             |                   |  |
| Crystal size                      | 0.50 x 0.10 x 0.10 mm <sup>3</sup>               |                   |  |
| Theta range for data collection   | 0.82 to 27.49°.                                  |                   |  |
| Index ranges                      | -13 ≤ h ≤ 13, -14 ≤ k ≤ 14, -33 ≤ l ≤ 33         |                   |  |
| Reflections collected             | 26256                                            |                   |  |
| Independent reflections           | 13150 [R(int) = 0.0234]                          |                   |  |
| Completeness to theta = 27.49°    | 94.9 %                                           |                   |  |
| Absorption correction             | None                                             |                   |  |
| Refinement method                 | Full-matrix least-squares on F <sup>2</sup>      |                   |  |
| Data / restraints / parameters    | 13150 / 0 / 769                                  |                   |  |
| Goodness-of-fit on F <sup>2</sup> | 1.069                                            |                   |  |
| Final R indices [I > 2σ(I)]       | R1 = 0.0770, wR2 = 0.1807                        |                   |  |
| R indices (all data)              | R1 = 0.0992, wR2 = 0.1929                        |                   |  |
| Largest diff. peak and hole       | 0.692 and -0.274 e.Å <sup>-3</sup>               |                   |  |

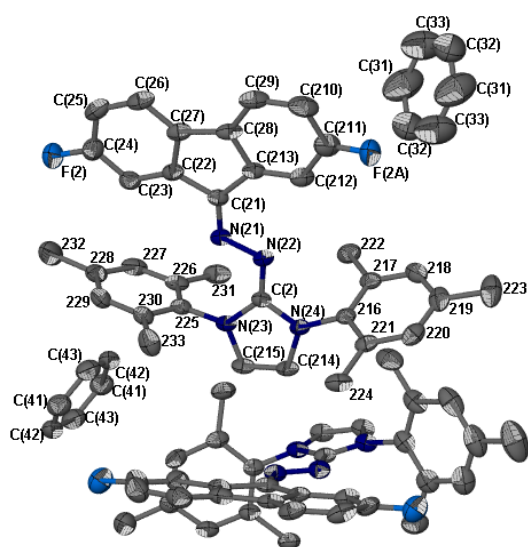

ORTEP Diagram of 3 (view 1)

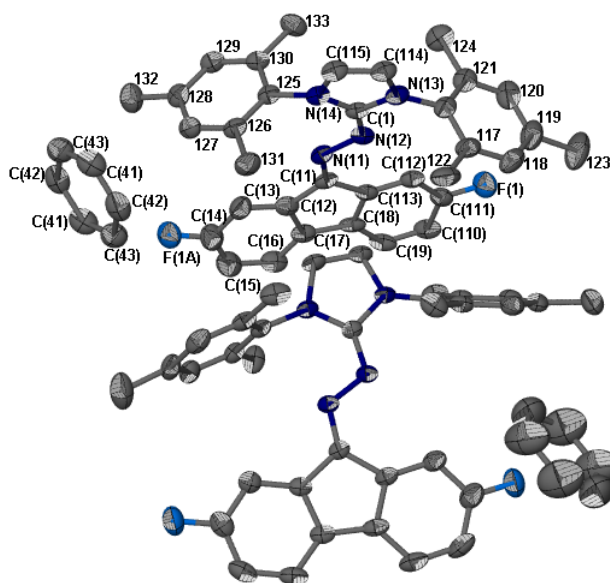

ORTEP Diagram of 3 (view 2)

There is occupational disorder in regard to the position of the single F atom in each independent molecule, these diagrams indicate both possible positions. The actual occupancy of each position is indicated below.

F2 (64%) F2A (36%)

F1 (21%) F1A (79%)

Hydrogen atoms are removed for clarity. Thermal ellipsoids are shown at 50% probability level.

**Table 2.** Atomic coordinates ( $\times 10^4$ ) and equivalent isotropic displacement parameters ( $\text{\AA}^2 \times 10^3$ ) for **3**.  $U(\text{eq})$  is defined as one third of the trace of the orthogonalized  $U^{ij}$  tensor.

|        | x        | y        | z       | U(eq)  |
|--------|----------|----------|---------|--------|
| C(1)   | -1334(2) | 12169(2) | 2779(1) | 38(1)  |
| C(11)  | 1325(2)  | 13755(2) | 2119(1) | 40(1)  |
| C(12)  | 2142(3)  | 13948(2) | 1602(1) | 45(1)  |
| C(13)  | 2031(3)  | 13596(3) | 1121(1) | 56(1)  |
| C(14)  | 3004(4)  | 13846(3) | 698(2)  | 69(1)  |
| C(15)  | 4097(4)  | 14452(3) | 749(1)  | 69(1)  |
| C(16)  | 4217(3)  | 14840(3) | 1220(1) | 58(1)  |
| C(17)  | 3256(3)  | 14593(2) | 1652(1) | 46(1)  |
| C(18)  | 3122(2)  | 14845(2) | 2195(1) | 43(1)  |
| C(19)  | 3938(3)  | 15448(2) | 2445(1) | 51(1)  |
| C(110) | 3595(3)  | 15554(2) | 2973(1) | 55(1)  |
| C(111) | 2408(3)  | 15049(2) | 3249(1) | 50(1)  |
| C(112) | 1603(2)  | 14457(2) | 3011(1) | 44(1)  |
| C(113) | 1938(2)  | 14340(2) | 2484(1) | 39(1)  |
| C(114) | -2889(2) | 10951(2) | 3266(1) | 45(1)  |
| C(115) | -2930(2) | 10905(2) | 2755(1) | 45(1)  |
| 1(16)  | -1449(2) | 12029(2) | 3749(1) | 45(1)  |
| 1(17)  | -601(3)  | 11264(3) | 3992(1) | 54(1)  |
| 1(18)  | -76(3)   | 11608(4) | 4409(1) | 69(1)  |
| 1(19)  | -371(4)  | 12662(4) | 4580(1) | 72(1)  |
| 1(20)  | -1250(3) | 13387(3) | 4335(1) | 65(1)  |
| 1(21)  | -1805(3) | 13089(3) | 3915(1) | 52(1)  |
| 1(22)  | -277(3)  | 10105(3) | 3809(1) | 67(1)  |
| 1(23)  | 256(5)   | 13042(5) | 5022(2) | 108(2) |
| 1(24)  | -2719(3) | 13900(3) | 3643(2) | 65(1)  |
| 1(25)  | -1869(2) | 12047(2) | 1874(1) | 39(1)  |
| 1(26)  | -1206(2) | 11364(2) | 1526(1) | 43(1)  |
| 1(27)  | -1055(3) | 11807(2) | 984(1)  | 48(1)  |
| 1(28)  | -1554(3) | 12888(2) | 783(1)  | 47(1)  |
| 1(29)  | -2264(3) | 13503(2) | 1146(1) | 45(1)  |

# Supplementary Material (ESI) for Chemical Communications  
# This journal is © The Royal Society of Chemistry 2004

|        |          |          |         |       |
|--------|----------|----------|---------|-------|
| 1(30)  | -2430(2) | 13111(2) | 1693(1) | 41(1) |
| 1(31)  | -666(3)  | 10187(3) | 1735(1) | 58(1) |
| 1(32)  | -1315(4) | 13386(3) | 192(1)  | 69(1) |
| 1(33)  | -3169(3) | 13821(2) | 2076(1) | 55(1) |
| C(2)   | 3836(2)  | 9652(2)  | 2571(1) | 32(1) |
| C(21)  | 6402(2)  | 7831(2)  | 2403(1) | 33(1) |
| C(22)  | 7169(2)  | 7303(2)  | 1983(1) | 36(1) |
| C(23)  | 6986(3)  | 7248(2)  | 1466(1) | 42(1) |
| C(24)  | 7885(3)  | 6667(2)  | 1160(1) | 51(1) |
| C(25)  | 8957(3)  | 6142(2)  | 1348(1) | 53(1) |
| C(26)  | 9144(2)  | 6197(2)  | 1865(1) | 49(1) |
| C(27)  | 8262(2)  | 6775(2)  | 2185(1) | 40(1) |
| C(28)  | 8185(2)  | 6955(2)  | 2738(1) | 41(1) |
| C(29)  | 9021(3)  | 6632(2)  | 3108(1) | 53(1) |
| C(210) | 8708(3)  | 6880(3)  | 3616(1) | 61(1) |
| C(211) | 7568(3)  | 7450(3)  | 3761(2) | 58(1) |
| C(212) | 6730(3)  | 7798(2)  | 3396(1) | 45(1) |
| C(213) | 7043(2)  | 7564(2)  | 2883(1) | 36(1) |
| C(214) | 2290(2)  | 11006(2) | 2659(1) | 42(1) |
| C(215) | 2439(2)  | 10830(2) | 2158(1) | 43(1) |
| 2(16)  | 3269(2)  | 10203(2) | 3477(1) | 36(1) |
| 2(17)  | 2904(2)  | 9169(2)  | 3837(1) | 41(1) |
| 2(18)  | 2965(3)  | 9162(3)  | 4372(1) | 48(1) |
| 2(19)  | 3356(3)  | 10144(3) | 4559(1) | 50(1) |
| 2(20)  | 3716(2)  | 11150(3) | 4189(1) | 47(1) |
| 2(21)  | 3684(2)  | 11204(2) | 3647(1) | 39(1) |
| 2(22)  | 2426(3)  | 8099(2)  | 3652(1) | 52(1) |
| 2(23)  | 3345(3)  | 10122(4) | 5150(1) | 72(1) |
| 2(24)  | 4101(3)  | 12314(2) | 3256(1) | 50(1) |
| 2(25)  | 3679(2)  | 9452(2)  | 1620(1) | 37(1) |
| 2(26)  | 2982(2)  | 8451(2)  | 1590(1) | 43(1) |
| 2(27)  | 3287(3)  | 7943(2)  | 1135(1) | 51(1) |
| 2(28)  | 4243(3)  | 8406(3)  | 721(1)  | 54(1) |
| 2(29)  | 4894(3)  | 9417(3)  | 765(1)  | 49(1) |
| 2(30)  | 4627(2)  | 9965(2)  | 1211(1) | 41(1) |

# Supplementary Material (ESI) for Chemical Communications  
# This journal is © The Royal Society of Chemistry 2004

|       |          |          |         |        |
|-------|----------|----------|---------|--------|
| 2(31) | 1972(3)  | 7918(2)  | 2044(1) | 56(1)  |
| 2(32) | 4606(5)  | 7802(3)  | 241(1)  | 85(1)  |
| 2(33) | 5366(3)  | 11046(3) | 1267(1) | 57(1)  |
| N(11) | 280(2)   | 13076(2) | 2204(1) | 42(1)  |
| N(12) | -325(2)  | 12913(2) | 2709(1) | 43(1)  |
| N(13) | -1914(2) | 11745(2) | 3285(1) | 42(1)  |
| N(14) | -1968(2) | 11666(2) | 2444(1) | 40(1)  |
| N(21) | 5390(2)  | 8455(2)  | 2306(1) | 34(1)  |
| N(22) | 4773(2)  | 8937(2)  | 2722(1) | 35(1)  |
| N(23) | 3393(2)  | 9980(2)  | 2094(1) | 37(1)  |
| N(24) | 3141(2)  | 10274(2) | 2925(1) | 35(1)  |
| C(41) | -1093(3) | 9337(3)  | 213(1)  | 64(1)  |
| C(42) | 14(4)    | 9109(3)  | 429(1)  | 61(1)  |
| C(43) | 1110(3)  | 9772(3)  | 219(1)  | 62(1)  |
| C(31) | 4289(6)  | 4438(6)  | 4720(3) | 130(2) |
| C(32) | 4239(6)  | 5613(6)  | 4671(2) | 118(2) |
| C(33) | 4923(7)  | 6188(5)  | 4960(3) | 129(2) |
| F(1)  | 2095(2)  | 15162(2) | 3756(1) | 67(1)  |
| F(1A) | 2811(10) | 13602(8) | 258(4)  | 67(1)  |
| F(2)  | 7710(3)  | 6570(3)  | 671(2)  | 65(1)  |
| F(2A) | 7364(5)  | 7739(5)  | 4204(2) | 65(1)  |

---

**Table 3.** Bond lengths [Å] and angles [°] for **3**.

---

|               |           |
|---------------|-----------|
| C(1)-N(12)    | 1.341(3)  |
| C(1)-N(13)    | 1.361(3)  |
| C(1)-N(14)    | 1.365(3)  |
| C(11)-N(11)   | 1.324(3)  |
| C(11)-C(12)   | 1.451(4)  |
| C(11)-C(113)  | 1.463(4)  |
| C(12)-C(13)   | 1.382(4)  |
| C(12)-C(17)   | 1.425(4)  |
| C(13)-C(14)   | 1.368(5)  |
| C(14)-F(1A)   | 1.253(12) |
| C(14)-C(15)   | 1.383(5)  |
| C(15)-C(16)   | 1.380(5)  |
| C(16)-C(17)   | 1.374(4)  |
| C(17)-C(18)   | 1.456(4)  |
| C(18)-C(19)   | 1.397(4)  |
| C(18)-C(113)  | 1.424(3)  |
| C(19)-C(110)  | 1.375(4)  |
| C(110)-C(111) | 1.416(4)  |
| C(111)-F(1)   | 1.320(4)  |
| C(111)-C(112) | 1.361(4)  |
| C(112)-C(113) | 1.374(4)  |
| C(114)-C(115) | 1.326(4)  |
| C(114)-N(13)  | 1.392(3)  |
| C(115)-N(14)  | 1.402(3)  |
| 1(16)-1(17)   | 1.388(4)  |
| 1(16)-1(21)   | 1.388(4)  |
| 1(16)-N(13)   | 1.437(3)  |
| 1(17)-1(18)   | 1.389(5)  |
| 1(17)-1(22)   | 1.505(5)  |
| 1(18)-1(19)   | 1.374(5)  |
| 1(19)-1(20)   | 1.387(5)  |
| 1(19)-1(23)   | 1.520(5)  |
| 1(20)-1(21)   | 1.391(4)  |



# Supplementary Material (ESI) for Chemical Communications  
# This journal is © The Royal Society of Chemistry 2004

|               |          |
|---------------|----------|
| 1(21)-1(24)   | 1.498(4) |
| 1(25)-1(30)   | 1.391(3) |
| 1(25)-1(26)   | 1.391(4) |
| 1(25)-N(14)   | 1.441(3) |
| 1(26)-1(27)   | 1.385(4) |
| 1(26)-1(31)   | 1.507(4) |
| 1(27)-1(28)   | 1.391(4) |
| 1(28)-1(29)   | 1.387(4) |
| 1(28)-1(32)   | 1.511(4) |
| 1(29)-1(30)   | 1.383(4) |
| 1(30)-1(33)   | 1.504(4) |
| C(2)-N(22)    | 1.337(3) |
| C(2)-N(23)    | 1.367(3) |
| C(2)-N(24)    | 1.370(3) |
| C(21)-N(21)   | 1.308(3) |
| C(21)-C(22)   | 1.459(3) |
| C(21)-C(213)  | 1.477(3) |
| C(22)-C(23)   | 1.379(4) |
| C(22)-C(27)   | 1.419(3) |
| C(23)-C(24)   | 1.377(4) |
| C(24)-F(2)    | 1.316(5) |
| C(24)-C(25)   | 1.385(4) |
| C(25)-C(26)   | 1.381(4) |
| C(26)-C(27)   | 1.384(4) |
| C(27)-C(28)   | 1.457(4) |
| C(28)-C(29)   | 1.391(4) |
| C(28)-C(213)  | 1.416(3) |
| C(29)-C(210)  | 1.372(4) |
| C(210)-C(211) | 1.390(5) |
| C(211)-F(2A)  | 1.225(6) |
| C(211)-C(212) | 1.389(4) |
| C(212)-C(213) | 1.375(4) |
| C(214)-C(215) | 1.320(4) |
| C(214)-N(24)  | 1.396(3) |
| C(215)-N(23)  | 1.404(3) |

# Supplementary Material (ESI) for Chemical Communications  
# This journal is © The Royal Society of Chemistry 2004

|                   |          |
|-------------------|----------|
| 2(16)-2(21)       | 1.392(3) |
| 2(16)-2(17)       | 1.395(3) |
| 2(16)-N(24)       | 1.430(3) |
| 2(17)-2(18)       | 1.383(4) |
| 2(17)-2(22)       | 1.507(4) |
| 2(18)-2(19)       | 1.387(4) |
| 2(19)-2(20)       | 1.383(4) |
| 2(19)-2(23)       | 1.509(4) |
| 2(20)-2(21)       | 1.388(4) |
| 2(21)-2(24)       | 1.508(4) |
| 2(25)-2(26)       | 1.389(3) |
| 2(25)-2(30)       | 1.389(4) |
| 2(25)-N(23)       | 1.440(3) |
| 2(26)-2(27)       | 1.385(4) |
| 2(26)-2(31)       | 1.503(4) |
| 2(27)-2(28)       | 1.384(4) |
| 2(28)-2(29)       | 1.384(4) |
| 2(28)-2(32)       | 1.512(4) |
| 2(29)-2(30)       | 1.386(4) |
| 2(30)-2(33)       | 1.511(4) |
| N(11)-N(12)       | 1.336(3) |
| N(21)-N(22)       | 1.358(3) |
| C(41)-C(42)       | 1.365(5) |
| C(41)-C(43)#1     | 1.378(5) |
| C(42)-C(43)       | 1.375(5) |
| C(43)-C(41)#1     | 1.378(5) |
| C(31)-C(32)       | 1.337(8) |
| C(31)-C(33)#2     | 1.368(8) |
| C(32)-C(33)       | 1.355(8) |
| C(33)-C(31)#2     | 1.368(8) |
| <br>              |          |
| N(12)-C(1)-N(13)  | 118.9(2) |
| N(12)-C(1)-N(14)  | 134.6(2) |
| N(13)-C(1)-N(14)  | 106.5(2) |
| N(11)-C(11)-C(12) | 120.8(2) |

# Supplementary Material (ESI) for Chemical Communications  
# This journal is © The Royal Society of Chemistry 2004

|                      |          |
|----------------------|----------|
| N(11)-C(11)-C(113)   | 131.1(2) |
| C(12)-C(11)-C(113)   | 107.9(2) |
| C(13)-C(12)-C(17)    | 119.9(3) |
| C(13)-C(12)-C(11)    | 132.3(3) |
| C(17)-C(12)-C(11)    | 107.7(2) |
| C(14)-C(13)-C(12)    | 119.8(3) |
| F(1A)-C(14)-C(13)    | 117.3(6) |
| F(1A)-C(14)-C(15)    | 122.0(5) |
| C(13)-C(14)-C(15)    | 120.4(4) |
| C(16)-C(15)-C(14)    | 121.0(3) |
| C(17)-C(16)-C(15)    | 119.7(3) |
| C(16)-C(17)-C(12)    | 119.2(3) |
| C(16)-C(17)-C(18)    | 132.4(3) |
| C(12)-C(17)-C(18)    | 108.4(2) |
| C(19)-C(18)-C(113)   | 120.5(3) |
| C(19)-C(18)-C(17)    | 131.0(2) |
| C(113)-C(18)-C(17)   | 108.5(2) |
| C(110)-C(19)-C(18)   | 119.8(3) |
| C(19)-C(110)-C(111)  | 118.4(3) |
| F(1)-C(111)-C(112)   | 120.0(3) |
| F(1)-C(111)-C(110)   | 117.4(3) |
| C(112)-C(111)-C(110) | 122.6(3) |
| C(111)-C(112)-C(113) | 119.7(3) |
| C(112)-C(113)-C(18)  | 119.1(2) |
| C(112)-C(113)-C(11)  | 133.5(2) |
| C(18)-C(113)-C(11)   | 107.4(2) |
| C(115)-C(114)-N(13)  | 107.8(2) |
| C(114)-C(115)-N(14)  | 108.0(2) |
| 1(17)-1(16)-1(21)    | 122.7(3) |
| 1(17)-1(16)-N(13)    | 118.5(3) |
| 1(21)-1(16)-N(13)    | 118.7(2) |
| 1(16)-1(17)-1(18)    | 117.4(3) |
| 1(16)-1(17)-1(22)    | 120.7(3) |
| 1(18)-1(17)-1(22)    | 121.9(3) |
| 1(19)-1(18)-1(17)    | 122.2(3) |

# Supplementary Material (ESI) for Chemical Communications  
# This journal is © The Royal Society of Chemistry 2004

|                    |            |
|--------------------|------------|
| 1(18)-1(19)-1(20)  | 118.6(3)   |
| 1(18)-1(19)-1(23)  | 121.2(4)   |
| 1(20)-1(19)-1(23)  | 120.2(4)   |
| 1(19)-1(20)-1(21)  | 121.8(3)   |
| 1(16)-1(21)-1(20)  | 117.4(3)   |
| 1(16)-1(21)-1(24)  | 121.4(3)   |
| 1(20)-1(21)-1(24)  | 121.2(3)   |
| 1(30)-1(25)-1(26)  | 122.3(3)   |
| 1(30)-1(25)-N(14)  | 118.0(2)   |
| 1(26)-1(25)-N(14)  | 119.6(2)   |
| 1(27)-1(26)-1(25)  | 117.6(2)   |
| 1(27)-1(26)-1(31)  | 121.4(2)   |
| 1(25)-1(26)-1(31)  | 121.0(3)   |
| 1(26)-1(27)-1(28)  | 122.3(3)   |
| 1(29)-1(28)-1(27)  | 117.7(3)   |
| 1(29)-1(28)-1(32)  | 121.0(3)   |
| 1(27)-1(28)-1(32)  | 121.4(3)   |
| 1(30)-1(29)-1(28)  | 122.5(2)   |
| 1(29)-1(30)-1(25)  | 117.5(2)   |
| 1(29)-1(30)-1(33)  | 121.1(2)   |
| 1(25)-1(30)-1(33)  | 121.4(2)   |
| N(22)-C(2)-N(23)   | 133.1(2)   |
| N(22)-C(2)-N(24)   | 120.6(2)   |
| N(23)-C(2)-N(24)   | 106.26(19) |
| N(21)-C(21)-C(22)  | 120.7(2)   |
| N(21)-C(21)-C(213) | 132.2(2)   |
| C(22)-C(21)-C(213) | 107.1(2)   |
| C(23)-C(22)-C(27)  | 120.1(2)   |
| C(23)-C(22)-C(21)  | 131.4(2)   |
| C(27)-C(22)-C(21)  | 108.5(2)   |
| C(24)-C(23)-C(22)  | 118.1(3)   |
| F(2)-C(24)-C(23)   | 119.2(3)   |
| F(2)-C(24)-C(25)   | 117.9(3)   |
| C(23)-C(24)-C(25)  | 122.8(3)   |
| C(26)-C(25)-C(24)  | 119.2(3)   |

# Supplementary Material (ESI) for Chemical Communications  
# This journal is © The Royal Society of Chemistry 2004

|                      |          |
|----------------------|----------|
| C(25)-C(26)-C(27)    | 119.6(3) |
| C(26)-C(27)-C(22)    | 120.1(3) |
| C(26)-C(27)-C(28)    | 132.1(2) |
| C(22)-C(27)-C(28)    | 107.8(2) |
| C(29)-C(28)-C(213)   | 119.9(3) |
| C(29)-C(28)-C(27)    | 130.6(2) |
| C(213)-C(28)-C(27)   | 109.4(2) |
| C(210)-C(29)-C(28)   | 119.3(3) |
| C(29)-C(210)-C(211)  | 120.4(3) |
| F(2A)-C(211)-C(212)  | 119.6(4) |
| F(2A)-C(211)-C(210)  | 118.8(4) |
| C(212)-C(211)-C(210) | 121.3(3) |
| C(213)-C(212)-C(211) | 118.7(3) |
| C(212)-C(213)-C(28)  | 120.3(2) |
| C(212)-C(213)-C(21)  | 132.6(2) |
| C(28)-C(213)-C(21)   | 107.1(2) |
| C(215)-C(214)-N(24)  | 107.9(2) |
| C(214)-C(215)-N(23)  | 108.3(2) |
| 2(21)-2(16)-2(17)    | 121.6(2) |
| 2(21)-2(16)-N(24)    | 118.5(2) |
| 2(17)-2(16)-N(24)    | 119.8(2) |
| 2(18)-2(17)-2(16)    | 118.0(2) |
| 2(18)-2(17)-2(22)    | 120.7(2) |
| 2(16)-2(17)-2(22)    | 121.3(2) |
| 2(17)-2(18)-2(19)    | 122.3(3) |
| 2(20)-2(19)-2(18)    | 117.9(3) |
| 2(20)-2(19)-2(23)    | 121.3(3) |
| 2(18)-2(19)-2(23)    | 120.8(3) |
| 2(19)-2(20)-2(21)    | 122.2(3) |
| 2(20)-2(21)-2(16)    | 118.0(2) |
| 2(20)-2(21)-2(24)    | 120.5(2) |
| 2(16)-2(21)-2(24)    | 121.5(2) |
| 2(26)-2(25)-2(30)    | 122.8(2) |
| 2(26)-2(25)-N(23)    | 118.3(2) |
| 2(30)-2(25)-N(23)    | 119.0(2) |

# Supplementary Material (ESI) for Chemical Communications  
# This journal is © The Royal Society of Chemistry 2004

|                     |            |
|---------------------|------------|
| 2(27)-2(26)-2(25)   | 117.4(3)   |
| 2(27)-2(26)-2(31)   | 121.5(3)   |
| 2(25)-2(26)-2(31)   | 121.0(3)   |
| 2(28)-2(27)-2(26)   | 122.0(3)   |
| 2(29)-2(28)-2(27)   | 118.5(3)   |
| 2(29)-2(28)-2(32)   | 120.5(3)   |
| 2(27)-2(28)-2(32)   | 121.0(3)   |
| 2(28)-2(29)-2(30)   | 122.1(3)   |
| 2(29)-2(30)-2(25)   | 117.3(2)   |
| 2(29)-2(30)-2(33)   | 122.1(3)   |
| 2(25)-2(30)-2(33)   | 120.5(2)   |
| C(11)-N(11)-N(12)   | 114.0(2)   |
| N(11)-N(12)-C(1)    | 111.5(2)   |
| C(1)-N(13)-C(114)   | 109.2(2)   |
| C(1)-N(13)-1(16)    | 122.2(2)   |
| C(114)-N(13)-1(16)  | 128.3(2)   |
| C(1)-N(14)-C(115)   | 108.5(2)   |
| C(1)-N(14)-1(25)    | 125.4(2)   |
| C(115)-N(14)-1(25)  | 124.8(2)   |
| C(21)-N(21)-N(22)   | 115.6(2)   |
| C(2)-N(22)-N(21)    | 111.40(19) |
| C(2)-N(23)-C(215)   | 108.5(2)   |
| C(2)-N(23)-2(25)    | 127.56(19) |
| C(215)-N(23)-2(25)  | 123.3(2)   |
| C(2)-N(24)-C(214)   | 109.0(2)   |
| C(2)-N(24)-2(16)    | 125.94(19) |
| C(214)-N(24)-2(16)  | 125.0(2)   |
| C(42)-C(41)-C(43)#1 | 120.0(3)   |
| C(41)-C(42)-C(43)   | 120.2(3)   |
| C(42)-C(43)-C(41)#1 | 119.8(3)   |
| C(32)-C(31)-C(33)#2 | 120.4(5)   |
| C(31)-C(32)-C(33)   | 120.1(5)   |
| C(32)-C(33)-C(31)#2 | 119.4(5)   |

---

Symmetry transformations used to generate equivalent atoms:

# Supplementary Material (ESI) for Chemical Communications  
# This journal is © The Royal Society of Chemistry 2004

#1 -x,-y+2,-z #2 -x+1,-y+1,-z+1

**Table 4.** Anisotropic displacement parameters ( $\text{\AA}^2 \times 10^3$ ) for **3**. The anisotropic displacement factor exponent takes the form:  $-2\pi^2 [h^2 a^{*2} U^{11} + \dots + 2 h k a^* b^* U^{12}]$

|        | U <sup>11</sup> | U <sup>22</sup> | U <sup>33</sup> | U <sup>23</sup> | U <sup>13</sup> | U <sup>12</sup> |
|--------|-----------------|-----------------|-----------------|-----------------|-----------------|-----------------|
| C(1)   | 29(1)           | 30(1)           | 55(2)           | -7(1)           | -10(1)          | 4(1)            |
| C(11)  | 34(1)           | 31(1)           | 56(2)           | -3(1)           | -16(1)          | 8(1)            |
| C(12)  | 45(2)           | 32(1)           | 53(2)           | 6(1)            | -5(1)           | 7(1)            |
| C(13)  | 64(2)           | 56(2)           | 53(2)           | -7(1)           | -20(2)          | 9(2)            |
| C(14)  | 83(3)           | 71(2)           | 49(2)           | 0(2)            | -6(2)           | 9(2)            |
| C(15)  | 71(2)           | 68(2)           | 58(2)           | 5(2)            | 3(2)            | 1(2)            |
| C(16)  | 51(2)           | 46(2)           | 68(2)           | 7(1)            | 1(2)            | 0(1)            |
| C(17)  | 41(1)           | 31(1)           | 61(2)           | 3(1)            | -8(1)           | 4(1)            |
| C(18)  | 27(1)           | 24(1)           | 73(2)           | 2(1)            | -4(1)           | 4(1)            |
| C(19)  | 36(1)           | 34(1)           | 79(2)           | -9(1)           | 3(1)            | 3(1)            |
| C(110) | 45(2)           | 39(2)           | 87(2)           | -23(2)          | -13(2)          | 5(1)            |
| C(111) | 51(2)           | 43(2)           | 59(2)           | -18(1)          | -9(1)           | 18(1)           |
| C(112) | 37(1)           | 32(1)           | 65(2)           | -10(1)          | -12(1)          | 6(1)            |
| C(113) | 34(1)           | 28(1)           | 54(2)           | -3(1)           | -5(1)           | 10(1)           |
| C(114) | 34(1)           | 39(1)           | 59(2)           | 3(1)            | -7(1)           | -7(1)           |
| C(115) | 35(1)           | 33(1)           | 64(2)           | -2(1)           | -10(1)          | -9(1)           |
| 1(16)  | 35(1)           | 51(2)           | 47(2)           | 0(1)            | -7(1)           | -11(1)          |
| 1(17)  | 31(1)           | 69(2)           | 56(2)           | 9(2)            | -4(1)           | -3(1)           |
| 1(18)  | 43(2)           | 101(3)          | 57(2)           | 15(2)           | -16(1)          | -12(2)          |
| 1(19)  | 64(2)           | 100(3)          | 50(2)           | 0(2)            | -13(2)          | -29(2)          |
| 1(20)  | 65(2)           | 71(2)           | 59(2)           | -12(2)          | -7(2)           | -23(2)          |
| 1(21)  | 45(2)           | 51(2)           | 56(2)           | -4(1)           | -7(1)           | -14(1)          |
| 1(22)  | 42(2)           | 73(2)           | 76(2)           | 9(2)            | -5(2)           | 16(2)           |
| 1(23)  | 102(3)          | 158(5)          | 67(3)           | -6(3)           | -35(2)          | -46(3)          |
| 1(24)  | 72(2)           | 46(2)           | 82(2)           | -14(2)          | -22(2)          | 0(2)            |
| 1(25)  | 35(1)           | 32(1)           | 50(2)           | -8(1)           | -11(1)          | -2(1)           |
| 1(26)  | 41(1)           | 35(1)           | 60(2)           | -15(1)          | -20(1)          | 3(1)            |
| 1(27)  | 50(2)           | 43(2)           | 57(2)           | -23(1)          | -15(1)          | 7(1)            |
| 1(28)  | 54(2)           | 40(1)           | 52(2)           | -10(1)          | -16(1)          | -2(1)           |
| 1(29)  | 48(2)           | 31(1)           | 58(2)           | -4(1)           | -14(1)          | 3(1)            |



# Supplementary Material (ESI) for Chemical Communications  
# This journal is © The Royal Society of Chemistry 2004

|        |       |        |       |        |        |       |
|--------|-------|--------|-------|--------|--------|-------|
| 1(30)  | 37(1) | 32(1)  | 55(2) | -5(1)  | -8(1)  | 0(1)  |
| 1(31)  | 66(2) | 45(2)  | 68(2) | -15(1) | -24(2) | 20(1) |
| 1(32)  | 94(3) | 59(2)  | 56(2) | -14(2) | -14(2) | 6(2)  |
| 1(33)  | 59(2) | 39(2)  | 60(2) | -1(1)  | 4(1)   | 12(1) |
| C(2)   | 33(1) | 24(1)  | 39(1) | -2(1)  | -7(1)  | 0(1)  |
| C(21)  | 33(1) | 25(1)  | 42(1) | -4(1)  | -10(1) | -2(1) |
| C(22)  | 33(1) | 26(1)  | 48(1) | -4(1)  | -3(1)  | -2(1) |
| C(23)  | 46(1) | 31(1)  | 46(2) | -3(1)  | -6(1)  | -1(1) |
| C(24)  | 62(2) | 39(1)  | 51(2) | -10(1) | 3(1)   | -4(1) |
| C(25)  | 46(2) | 38(1)  | 71(2) | -15(1) | 10(1)  | 2(1)  |
| C(26)  | 33(1) | 35(1)  | 78(2) | -12(1) | -5(1)  | 4(1)  |
| C(27)  | 33(1) | 27(1)  | 60(2) | -7(1)  | -9(1)  | -2(1) |
| C(28)  | 31(1) | 25(1)  | 68(2) | -7(1)  | -14(1) | 2(1)  |
| C(29)  | 45(2) | 37(1)  | 82(2) | -13(1) | -28(2) | 10(1) |
| C(210) | 66(2) | 50(2)  | 78(2) | -12(2) | -45(2) | 11(2) |
| C(211) | 71(2) | 50(2)  | 64(2) | -19(2) | -31(2) | 7(2)  |
| C(212) | 47(2) | 38(1)  | 56(2) | -12(1) | -19(1) | 6(1)  |
| C(213) | 35(1) | 25(1)  | 51(2) | -7(1)  | -15(1) | 2(1)  |
| C(214) | 36(1) | 33(1)  | 54(2) | -2(1)  | -9(1)  | 11(1) |
| C(215) | 38(1) | 36(1)  | 55(2) | -1(1)  | -15(1) | 12(1) |
| 2(16)  | 29(1) | 34(1)  | 42(1) | -5(1)  | -3(1)  | 10(1) |
| 2(17)  | 32(1) | 35(1)  | 51(2) | -3(1)  | 1(1)   | 7(1)  |
| 2(18)  | 39(1) | 51(2)  | 47(2) | 5(1)   | 1(1)   | 7(1)  |
| 2(19)  | 33(1) | 72(2)  | 45(2) | -12(1) | -2(1)  | 8(1)  |
| 2(20)  | 36(1) | 51(2)  | 59(2) | -23(1) | -6(1)  | 5(1)  |
| 2(21)  | 28(1) | 36(1)  | 55(2) | -10(1) | -5(1)  | 8(1)  |
| 2(22)  | 55(2) | 34(1)  | 63(2) | -6(1)  | 5(1)   | -2(1) |
| 2(23)  | 56(2) | 112(3) | 49(2) | -22(2) | 1(2)   | 2(2)  |
| 2(24)  | 46(2) | 33(1)  | 73(2) | -6(1)  | -14(1) | 3(1)  |
| 2(25)  | 38(1) | 31(1)  | 42(1) | -2(1)  | -15(1) | 6(1)  |
| 2(26)  | 40(1) | 32(1)  | 57(2) | -1(1)  | -20(1) | 6(1)  |
| 2(27)  | 64(2) | 33(1)  | 64(2) | -7(1)  | -33(2) | 5(1)  |
| 2(28)  | 80(2) | 44(2)  | 43(2) | -9(1)  | -27(2) | 17(2) |
| 2(29)  | 56(2) | 51(2)  | 39(2) | 1(1)   | -13(1) | 8(1)  |
| 2(30)  | 43(1) | 41(1)  | 39(1) | -1(1)  | -14(1) | 2(1)  |

# Supplementary Material (ESI) for Chemical Communications  
# This journal is © The Royal Society of Chemistry 2004

|       |        |        |        |        |        |        |
|-------|--------|--------|--------|--------|--------|--------|
| 2(31) | 45(2)  | 38(2)  | 82(2)  | -1(1)  | -12(2) | -3(1)  |
| 2(32) | 149(4) | 57(2)  | 53(2)  | -15(2) | -24(2) | 14(2)  |
| 2(33) | 61(2)  | 61(2)  | 46(2)  | -3(1)  | -8(1)  | -22(2) |
| N(11) | 41(1)  | 36(1)  | 51(1)  | -5(1)  | -15(1) | 5(1)   |
| N(12) | 33(1)  | 40(1)  | 52(1)  | -3(1)  | -3(1)  | 3(1)   |
| N(13) | 33(1)  | 38(1)  | 53(1)  | -1(1)  | -8(1)  | -4(1)  |
| N(14) | 35(1)  | 29(1)  | 54(1)  | -4(1)  | -10(1) | -2(1)  |
| N(21) | 30(1)  | 28(1)  | 43(1)  | -5(1)  | -7(1)  | 1(1)   |
| N(22) | 31(1)  | 28(1)  | 45(1)  | -7(1)  | -6(1)  | 3(1)   |
| N(23) | 36(1)  | 30(1)  | 44(1)  | -2(1)  | -9(1)  | 6(1)   |
| N(24) | 32(1)  | 31(1)  | 43(1)  | -4(1)  | -5(1)  | 7(1)   |
| C(41) | 65(2)  | 48(2)  | 73(2)  | -9(2)  | 3(2)   | -2(2)  |
| C(42) | 88(2)  | 38(2)  | 52(2)  | -6(1)  | -2(2)  | 8(2)   |
| C(43) | 67(2)  | 52(2)  | 70(2)  | -18(2) | -14(2) | 12(2)  |
| C(31) | 109(4) | 121(5) | 186(6) | -75(4) | -54(4) | 23(4)  |
| C(32) | 128(5) | 125(5) | 101(4) | -13(3) | -33(3) | 48(4)  |
| C(33) | 137(5) | 78(3)  | 175(6) | -18(4) | -39(4) | 9(3)   |
| F(1)  | 75(2)  | 65(1)  | 67(2)  | -27(1) | -11(1) | 0(1)   |
| F(1A) | 75(2)  | 65(1)  | 67(2)  | -27(1) | -11(1) | 0(1)   |
| F(2)  | 88(2)  | 66(2)  | 44(1)  | -16(1) | -8(1)  | 8(1)   |
| F(2A) | 88(2)  | 66(2)  | 44(1)  | -16(1) | -8(1)  | 8(1)   |

---

**Table 5.** Hydrogen coordinates ( $\times 10^4$ ) and isotropic displacement parameters ( $\text{\AA}^2 \times 10^3$ ) for **3**.

|        | x     | y     | z    | U(eq) |
|--------|-------|-------|------|-------|
| H(13A) | 1281  | 13181 | 1084 | 68    |
| H(15A) | 4775  | 14603 | 455  | 83    |
| H(16A) | 4962  | 15276 | 1246 | 69    |
| H(19A) | 4727  | 15784 | 2249 | 61    |
| H(11A) | 4142  | 15956 | 3150 | 66    |
| H(11B) | 815   | 14128 | 3209 | 53    |
| H(11C) | -3429 | 10518 | 3565 | 55    |
| H(11D) | -3510 | 10439 | 2623 | 54    |
| H(18A) | 506   | 11097 | 4582 | 83    |
| H(20A) | -1478 | 14107 | 4458 | 78    |
| H(12A) | -740  | 10027 | 3512 | 100   |
| H(12B) | -532  | 9457  | 4106 | 100   |
| H(12C) | 652   | 10078 | 3689 | 100   |
| H(12D) | 327   | 9681  | 4026 | 100   |
| H(12E) | 119   | 10251 | 3432 | 100   |
| H(12F) | -1065 | 9630  | 3849 | 100   |
| H(23A) | 850   | 12432 | 5148 | 162   |
| H(23B) | -410  | 13154 | 5320 | 162   |
| H(23C) | 733   | 13785 | 4884 | 162   |
| H(12G) | -2853 | 14597 | 3817 | 97    |
| H(12H) | -3544 | 13488 | 3669 | 97    |
| H(12I) | -2357 | 14144 | 3265 | 97    |
| H(12J) | -2983 | 13556 | 3350 | 97    |
| H(12K) | -2292 | 14665 | 3499 | 97    |
| H(12L) | -3479 | 14009 | 3902 | 97    |
| H(27A) | -594  | 11359 | 740  | 57    |
| H(29A) | -2650 | 14221 | 1014 | 55    |
| H(13B) | -868  | 10027 | 2126 | 87    |
| H(13C) | 270   | 10204 | 1628 | 87    |

# Supplementary Material (ESI) for Chemical Communications  
# This journal is © The Royal Society of Chemistry 2004

|        |       |       |      |     |
|--------|-------|-------|------|-----|
| H(13D) | -1050 | 9567  | 1587 | 87  |
| H(13E) | -230  | 9838  | 1434 | 87  |
| H(13F) | -1369 | 9661  | 1933 | 87  |
| H(13G) | -49   | 10298 | 1974 | 87  |
| H(32A) | -1739 | 14149 | 129  | 103 |
| H(32B) | -1663 | 12840 | -7   | 103 |
| H(32C) | -386  | 13495 | 72   | 103 |
| H(33A) | -3487 | 14537 | 1874 | 82  |
| H(33B) | -2602 | 14039 | 2315 | 82  |
| H(33C) | -3899 | 13350 | 2287 | 82  |
| H(23D) | 6260  | 7600  | 1326 | 50  |
| H(25A) | 9556  | 5750  | 1124 | 63  |
| H(26A) | 9873  | 5840  | 2001 | 59  |
| H(29B) | 9800  | 6244  | 3009 | 63  |
| H(21A) | 9273  | 6660  | 3871 | 73  |
| H(21B) | 5955  | 8191  | 3498 | 54  |
| H(21C) | 1706  | 11537 | 2812 | 50  |
| H(21D) | 1979  | 11211 | 1887 | 52  |
| H(18B) | 2731  | 8460  | 4621 | 58  |
| H(20B) | 3995  | 11827 | 4311 | 57  |
| H(22D) | 2219  | 7464  | 3960 | 78  |
| H(22E) | 3096  | 7838  | 3389 | 78  |
| H(22F) | 1652  | 8300  | 3487 | 78  |
| H(23E) | 3066  | 9339  | 5347 | 108 |
| H(23F) | 2749  | 10716 | 5272 | 108 |
| H(23G) | 4213  | 10298 | 5214 | 108 |
| H(22A) | 4358  | 12916 | 3450 | 76  |
| H(22B) | 3384  | 12604 | 3068 | 76  |
| H(22C) | 4831  | 12142 | 2995 | 76  |
| H(22G) | 4024  | 12192 | 2892 | 76  |
| H(22H) | 4998  | 12504 | 3274 | 76  |
| H(22I) | 3551  | 12966 | 3347 | 76  |
| H(27B) | 2827  | 7256  | 1105 | 62  |
| H(29C) | 5544  | 9746  | 481  | 59  |
| H(31D) | 1585  | 7223  | 1952 | 84  |

# Supplementary Material (ESI) for Chemical Communications  
# This journal is © The Royal Society of Chemistry 2004

|        |       |       |      |           |
|--------|-------|-------|------|-----------|
| H(31E) | 1304  | 8500  | 2110 | 84        |
| H(31F) | 2369  | 7685  | 2368 | 84        |
| H(32D) | 5300  | 8252  | -7   | 127       |
| H(32E) | 3854  | 7762  | 59   | 127       |
| H(32F) | 4898  | 7003  | 358  | 127       |
| H(23H) | 5034  | 11294 | 1609 | 85        |
| H(23I) | 5263  | 11685 | 972  | 85        |
| H(23J) | 6281  | 10859 | 1257 | 85        |
| H(23K) | 6018  | 11264 | 950  | 85        |
| H(23L) | 5788  | 10874 | 1587 | 85        |
| H(23M) | 4771  | 11700 | 1301 | 85        |
| H(41A) | -1850 | 8881  | 360  | 76        |
| H(42A) | 26    | 8491  | 725  | 73        |
| H(43A) | 1878  | 9616  | 371  | 74        |
| H(31G) | 3774  | 4036  | 4530 | 156       |
| H(32G) | 3723  | 6046  | 4434 | 141       |
| H(33G) | 4856  | 7018  | 4941 | 155       |
| H(14)  | 2919  | 13614 | 375  | 250(100)  |
| H(111) | 2192  | 15117 | 3612 | 2000(500) |
| H(211) | 7359  | 7577  | 4114 | 310(120)  |
| H(24)  | 7750  | 6613  | 810  | 0(20)     |

---

**Table 1.** Crystal data and structure refinement for **4**.

|                                   |                                                                |          |
|-----------------------------------|----------------------------------------------------------------|----------|
| Identification code               | <b>4</b>                                                       |          |
| Empirical formula                 | C <sub>34</sub> H <sub>30</sub> Cl <sub>2</sub> N <sub>4</sub> |          |
| Formula weight                    | 565.52                                                         |          |
| Temperature                       | 173(2) K                                                       |          |
| Wavelength                        | 0.71073 Å                                                      |          |
| Crystal system                    | Orthorhombic                                                   |          |
| Space group                       | Pna2(1)                                                        |          |
| Unit cell dimensions              | a = 10.5020(5) Å                                               | α = 90°. |
|                                   | b = 11.0120(5) Å                                               | β = 90°. |
|                                   | c = 25.2110(12) Å                                              | γ = 90°. |
| Volume                            | 2915.6(2) Å <sup>3</sup>                                       |          |
| Z                                 | 4                                                              |          |
| Density (calculated)              | 1.288 Mg/m <sup>3</sup>                                        |          |
| Absorption coefficient            | 0.253 mm <sup>-1</sup>                                         |          |
| F(000)                            | 1184                                                           |          |
| Crystal size                      | 0.2 x 0.2 x 0.4 mm <sup>3</sup>                                |          |
| Theta range for data collection   | 2.02 to 20.00°.                                                |          |
| Index ranges                      | -10 ≤ h ≤ 10, -10 ≤ k ≤ 10, -24 ≤ l ≤ 24                       |          |
| Reflections collected             | 11349                                                          |          |
| Independent reflections           | 2700 [R(int) = 0.0456]                                         |          |
| Completeness to theta = 20.00°    | 99.8 %                                                         |          |
| Absorption correction             | None                                                           |          |
| Refinement method                 | Full-matrix least-squares on F <sup>2</sup>                    |          |
| Data / restraints / parameters    | 2700 / 2030 / 495                                              |          |
| Goodness-of-fit on F <sup>2</sup> | 1.067                                                          |          |
| Final R indices [I > 2σ(I)]       | R1 = 0.0448, wR2 = 0.0901                                      |          |
| R indices (all data)              | R1 = 0.0540, wR2 = 0.0933                                      |          |
| Absolute structure parameter      | 0.24(12)                                                       |          |
| Largest diff. peak and hole       | 0.111 and -0.144 e.Å <sup>-3</sup>                             |          |

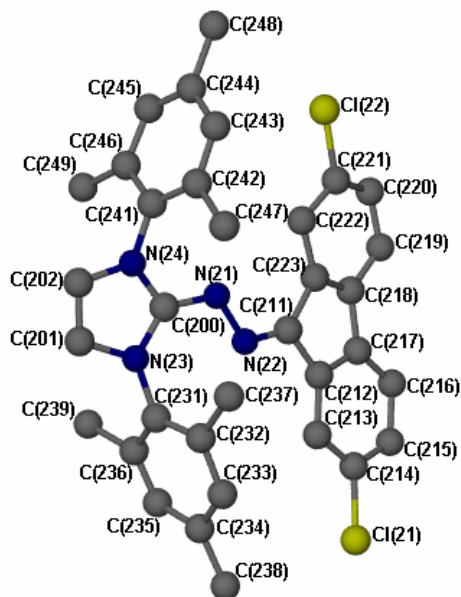

Ball and Stick Diagram of 4 (view 1)

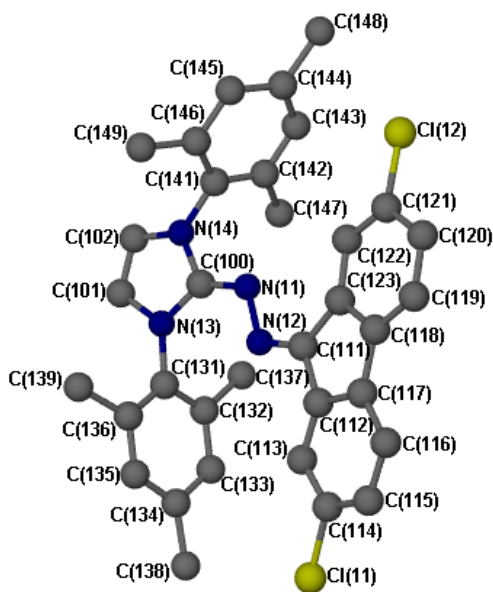

Ball and Stick Diagram of 4 (view 2)

These are the two components used to model the occupational disorder in the structure. The refined percentages of each component are listed below.

65%

35%

Please note that because of the poor quality of the data, in combination with twinning and occupational disorder, the structural parameters for 4 must be treated with caution, however the connectivity, arrangement and structure of the molecule is clearly determined. Hydrogen atoms have been removed for clarity.

**Table 2.** Atomic coordinates ( $\times 10^4$ ) and equivalent isotropic displacement parameters ( $\text{\AA}^2 \times 10^3$ ) for 4.  $U(\text{eq})$  is defined as one third of the trace of the orthogonalized  $U^{ij}$  tensor.

|        | x         | y         | z       | $U(\text{eq})$ |
|--------|-----------|-----------|---------|----------------|
| N(11)  | 12640(5)  | 10500(5)  | 3408(2) | 29(1)          |
| N(12)  | 12054(5)  | 10105(5)  | 2961(2) | 28(1)          |
| C(100) | 13608(9)  | 11260(9)  | 3309(3) | 27(2)          |
| N(13)  | 14111(8)  | 11762(9)  | 2852(3) | 33(2)          |
| C(101) | 15079(11) | 12576(10) | 3012(3) | 33(2)          |
| C(102) | 15130(10) | 12568(10) | 3539(3) | 31(2)          |
| N(14)  | 14199(9)  | 11798(9)  | 3715(3) | 33(2)          |
| C(111) | 11025(6)  | 9452(7)   | 3047(2) | 26(1)          |

# Supplementary Material (ESI) for Chemical Communications  
# This journal is © The Royal Society of Chemistry 2004

|        |           |           |         |       |
|--------|-----------|-----------|---------|-------|
| C(112) | 10265(6)  | 9055(7)   | 2610(2) | 27(1) |
| C(113) | 10475(7)  | 9041(7)   | 2068(2) | 35(2) |
| C(114) | 9561(6)   | 8532(7)   | 1749(2) | 34(1) |
| Cl(11) | 9876(2)   | 8430(2)   | 1071(1) | 61(1) |
| C(115) | 8433(8)   | 8060(9)   | 1942(3) | 46(2) |
| C(116) | 8193(8)   | 8071(11)  | 2485(3) | 38(2) |
| C(117) | 9152(6)   | 8519(8)   | 2825(2) | 30(1) |
| C(118) | 9206(6)   | 8565(8)   | 3396(2) | 26(1) |
| C(119) | 8406(8)   | 8178(9)   | 3781(2) | 33(2) |
| C(120) | 8733(7)   | 8218(8)   | 4310(3) | 35(2) |
| C(121) | 9894(7)   | 8759(8)   | 4453(2) | 44(2) |
| Cl(12) | 10341(2)  | 8731(2)   | 5121(1) | 68(1) |
| C(122) | 10725(7)  | 9171(7)   | 4080(3) | 36(2) |
| C(123) | 10389(6)  | 9098(7)   | 3543(2) | 26(1) |
| C(131) | 13808(12) | 11458(11) | 2313(3) | 31(2) |
| C(132) | 14287(19) | 10360(14) | 2133(4) | 39(2) |
| C(133) | 13928(12) | 10002(13) | 1621(4) | 41(2) |
| C(134) | 13215(10) | 10742(11) | 1286(3) | 41(2) |
| C(135) | 12865(12) | 11834(10) | 1493(3) | 40(2) |
| C(136) | 13104(9)  | 12213(10) | 1994(3) | 30(2) |
| C(137) | 15040(20) | 9560(20)  | 2499(5) | 44(3) |
| C(138) | 12911(12) | 10284(13) | 749(3)  | 60(2) |
| C(139) | 12700(20) | 13479(14) | 2179(5) | 54(3) |
| C(141) | 14013(16) | 11400(12) | 4249(3) | 33(2) |
| C(142) | 14460(20) | 10274(15) | 4417(4) | 38(2) |
| C(143) | 14240(20) | 9912(15)  | 4927(4) | 44(2) |
| C(144) | 13500(20) | 10586(16) | 5268(5) | 46(2) |
| C(145) | 13096(14) | 11752(12) | 5112(3) | 39(2) |
| C(146) | 13300(20) | 12153(15) | 4587(4) | 34(2) |
| C(147) | 15335(10) | 9526(11)  | 4070(4) | 44(2) |
| C(148) | 13200(30) | 10161(19) | 5829(5) | 72(3) |
| C(149) | 12826(13) | 13365(11) | 4427(3) | 37(2) |
| N(21)  | 12691(10) | 10509(11) | 3033(4) | 29(1) |
| N(22)  | 12066(9)  | 10118(11) | 3476(4) | 28(1) |
| C(200) | 13580(20) | 11380(20) | 3112(5) | 27(2) |



# Supplementary Material (ESI) for Chemical Communications  
# This journal is © The Royal Society of Chemistry 2004

|        |           |           |          |       |
|--------|-----------|-----------|----------|-------|
| N(23)  | 14188(19) | 11817(18) | 3560(6)  | 33(2) |
| C(201) | 15040(20) | 12731(19) | 3375(7)  | 33(2) |
| C(202) | 15040(20) | 12720(20) | 2848(7)  | 31(2) |
| N(24)  | 14207(18) | 11826(16) | 2696(6)  | 33(2) |
| C(211) | 11033(11) | 9479(14)  | 3402(4)  | 26(1) |
| C(212) | 10327(13) | 9028(16)  | 3849(4)  | 26(1) |
| C(213) | 10578(13) | 9023(15)  | 4401(4)  | 36(2) |
| C(214) | 9671(13)  | 8493(17)  | 4737(4)  | 44(2) |
| Cl(21) | 10003(5)  | 8388(6)   | 5420(2)  | 68(1) |
| C(215) | 8531(13)  | 7992(17)  | 4555(4)  | 35(2) |
| C(216) | 8276(17)  | 7990(20)  | 4004(5)  | 33(2) |
| C(217) | 9201(14)  | 8487(18)  | 3658(4)  | 26(1) |
| C(218) | 9131(13)  | 8630(20)  | 3087(4)  | 30(1) |
| C(219) | 8419(17)  | 8150(20)  | 2695(5)  | 38(2) |
| C(220) | 8616(16)  | 8300(20)  | 2160(5)  | 46(2) |
| C(221) | 9854(13)  | 8691(16)  | 2032(4)  | 34(1) |
| Cl(22) | 10224(4)  | 8799(4)   | 1367(2)  | 61(1) |
| C(222) | 10640(14) | 9237(16)  | 2391(4)  | 35(2) |
| C(223) | 10351(11) | 9064(14)  | 2930(4)  | 27(1) |
| C(231) | 13970(30) | 11480(20) | 4106(7)  | 33(2) |
| C(232) | 14440(50) | 10340(30) | 4264(9)  | 38(2) |
| C(233) | 14110(40) | 10020(30) | 4785(9)  | 44(2) |
| C(234) | 13460(50) | 10760(30) | 5139(11) | 46(2) |
| C(235) | 13020(30) | 11840(20) | 4933(7)  | 39(2) |
| C(236) | 13300(50) | 12240(30) | 4442(9)  | 34(2) |
| C(237) | 15040(20) | 9510(20)  | 3863(7)  | 44(2) |
| C(238) | 13140(60) | 10330(40) | 5681(11) | 72(3) |
| C(239) | 12800(30) | 13450(20) | 4223(7)  | 37(2) |
| C(241) | 14010(20) | 11430(20) | 2161(6)  | 31(2) |
| C(242) | 14410(40) | 10290(30) | 1981(8)  | 39(2) |
| C(243) | 14170(30) | 9950(20)  | 1474(7)  | 41(2) |
| C(244) | 13500(20) | 10680(20) | 1133(7)  | 41(2) |
| C(245) | 13020(30) | 11800(20) | 1308(6)  | 40(2) |
| C(246) | 13350(20) | 12221(18) | 1821(6)  | 30(2) |
| C(247) | 15150(40) | 9470(40)  | 2348(12) | 44(3) |

# Supplementary Material (ESI) for Chemical Communications  
# This journal is © The Royal Society of Chemistry 2004

|        |           |           |          |       |
|--------|-----------|-----------|----------|-------|
| C(248) | 13130(30) | 10270(30) | 572(6)   | 60(2) |
| C(249) | 12830(50) | 13400(30) | 2023(12) | 54(3) |

---

**Table 3.** Bond lengths [Å] and angles [°] for **4**.

---

|               |           |
|---------------|-----------|
| N(11)-C(100)  | 1.340(6)  |
| N(11)-N(12)   | 1.358(6)  |
| N(12)-C(111)  | 1.316(6)  |
| C(100)-N(14)  | 1.335(9)  |
| C(100)-N(13)  | 1.384(8)  |
| N(13)-C(101)  | 1.414(9)  |
| N(13)-C(131)  | 1.434(10) |
| C(101)-C(102) | 1.330(6)  |
| C(102)-N(14)  | 1.368(9)  |
| N(14)-C(141)  | 1.431(9)  |
| C(111)-C(112) | 1.429(7)  |
| C(111)-C(123) | 1.470(7)  |
| C(112)-C(113) | 1.386(7)  |
| C(112)-C(117) | 1.416(8)  |
| C(113)-C(114) | 1.371(7)  |
| C(114)-C(115) | 1.382(7)  |
| C(114)-Cl(11) | 1.745(6)  |
| C(115)-C(116) | 1.392(8)  |
| C(116)-C(117) | 1.412(7)  |
| C(117)-C(118) | 1.442(6)  |
| C(118)-C(119) | 1.352(7)  |
| C(118)-C(123) | 1.423(8)  |
| C(119)-C(120) | 1.378(8)  |
| C(120)-C(121) | 1.404(8)  |
| C(121)-C(122) | 1.360(8)  |
| C(121)-Cl(12) | 1.748(6)  |
| C(122)-C(123) | 1.401(8)  |
| C(131)-C(136) | 1.374(13) |
| C(131)-C(132) | 1.387(13) |
| C(132)-C(133) | 1.401(12) |
| C(132)-C(137) | 1.504(14) |
| C(133)-C(134) | 1.391(14) |
| C(134)-C(135) | 1.361(11) |

# Supplementary Material (ESI) for Chemical Communications  
# This journal is © The Royal Society of Chemistry 2004

|               |           |
|---------------|-----------|
| C(134)-C(138) | 1.479(10) |
| C(135)-C(136) | 1.353(10) |
| C(136)-C(139) | 1.530(13) |
| C(141)-C(142) | 1.392(13) |
| C(141)-C(146) | 1.403(13) |
| C(142)-C(143) | 1.365(11) |
| C(142)-C(147) | 1.514(14) |
| C(143)-C(144) | 1.372(14) |
| C(144)-C(145) | 1.409(12) |
| C(144)-C(148) | 1.525(11) |
| C(145)-C(146) | 1.414(10) |
| C(146)-C(149) | 1.481(12) |
| N(21)-C(200)  | 1.347(10) |
| N(21)-N(22)   | 1.365(10) |
| N(22)-C(211)  | 1.306(10) |
| C(200)-N(24)  | 1.337(13) |
| C(200)-N(23)  | 1.387(13) |
| N(23)-C(201)  | 1.422(13) |
| N(23)-C(231)  | 1.444(14) |
| C(201)-C(202) | 1.330(12) |
| C(202)-N(24)  | 1.370(14) |
| N(24)-C(241)  | 1.434(14) |
| C(211)-C(223) | 1.461(10) |
| C(211)-C(212) | 1.438(9)  |
| C(212)-C(217) | 1.409(12) |
| C(212)-C(213) | 1.417(10) |
| C(213)-C(214) | 1.403(10) |
| C(214)-C(215) | 1.396(10) |
| C(214)-Cl(21) | 1.759(10) |
| C(215)-C(216) | 1.413(10) |
| C(216)-C(217) | 1.416(10) |
| C(217)-C(218) | 1.450(9)  |
| C(218)-C(219) | 1.351(12) |
| C(218)-C(223) | 1.421(12) |
| C(219)-C(220) | 1.374(13) |

# Supplementary Material (ESI) for Chemical Communications  
# This journal is © The Royal Society of Chemistry 2004

|               |           |
|---------------|-----------|
| C(220)-C(221) | 1.407(13) |
| C(221)-C(222) | 1.366(12) |
| C(221)-Cl(22) | 1.724(10) |
| C(222)-C(223) | 1.406(11) |
| C(231)-C(236) | 1.384(18) |
| C(231)-C(232) | 1.404(18) |
| C(232)-C(233) | 1.409(16) |
| C(232)-C(237) | 1.502(18) |
| C(233)-C(234) | 1.384(19) |
| C(234)-C(235) | 1.381(16) |
| C(234)-C(238) | 1.485(15) |
| C(235)-C(236) | 1.342(14) |
| C(236)-C(239) | 1.537(17) |
| C(241)-C(242) | 1.395(18) |
| C(241)-C(246) | 1.404(18) |
| C(242)-C(243) | 1.358(16) |
| C(242)-C(247) | 1.511(19) |
| C(243)-C(244) | 1.368(19) |
| C(244)-C(245) | 1.408(17) |
| C(244)-C(248) | 1.536(15) |
| C(245)-C(246) | 1.419(14) |
| C(246)-C(249) | 1.499(17) |

|                     |          |
|---------------------|----------|
| C(100)-N(11)-N(12)  | 112.9(6) |
| C(111)-N(12)-N(11)  | 114.1(5) |
| N(14)-C(100)-N(11)  | 119.2(6) |
| N(14)-C(100)-N(13)  | 106.5(4) |
| N(11)-C(100)-N(13)  | 134.0(6) |
| C(100)-N(13)-C(101) | 106.9(6) |
| C(100)-N(13)-C(131) | 127.7(7) |
| C(101)-N(13)-C(131) | 125.2(7) |
| C(102)-C(101)-N(13) | 108.0(7) |
| C(101)-C(102)-N(14) | 107.4(7) |
| C(100)-N(14)-C(102) | 111.1(6) |
| C(100)-N(14)-C(141) | 121.4(8) |

# Supplementary Material (ESI) for Chemical Communications  
# This journal is © The Royal Society of Chemistry 2004

|                      |           |
|----------------------|-----------|
| C(102)-N(14)-C(141)  | 126.4(8)  |
| N(12)-C(111)-C(112)  | 119.8(5)  |
| N(12)-C(111)-C(123)  | 131.3(5)  |
| C(112)-C(111)-C(123) | 108.7(4)  |
| C(113)-C(112)-C(117) | 120.3(6)  |
| C(113)-C(112)-C(111) | 132.5(6)  |
| C(117)-C(112)-C(111) | 107.1(5)  |
| C(114)-C(113)-C(112) | 118.1(6)  |
| C(113)-C(114)-C(115) | 123.3(6)  |
| C(113)-C(114)-Cl(11) | 117.8(5)  |
| C(115)-C(114)-Cl(11) | 118.8(5)  |
| C(114)-C(115)-C(116) | 119.8(6)  |
| C(115)-C(116)-C(117) | 118.1(7)  |
| C(116)-C(117)-C(112) | 120.1(5)  |
| C(116)-C(117)-C(118) | 130.3(6)  |
| C(112)-C(117)-C(118) | 109.6(6)  |
| C(119)-C(118)-C(123) | 119.0(5)  |
| C(119)-C(118)-C(117) | 132.9(6)  |
| C(123)-C(118)-C(117) | 108.0(5)  |
| C(118)-C(119)-C(120) | 122.0(6)  |
| C(119)-C(120)-C(121) | 118.6(5)  |
| C(122)-C(121)-C(120) | 121.4(6)  |
| C(122)-C(121)-Cl(12) | 119.9(5)  |
| C(120)-C(121)-Cl(12) | 118.2(5)  |
| C(121)-C(122)-C(123) | 119.2(6)  |
| C(122)-C(123)-C(118) | 119.7(6)  |
| C(122)-C(123)-C(111) | 133.8(5)  |
| C(118)-C(123)-C(111) | 106.5(5)  |
| C(136)-C(131)-C(132) | 122.0(8)  |
| C(136)-C(131)-N(13)  | 122.3(9)  |
| C(132)-C(131)-N(13)  | 115.7(9)  |
| C(131)-C(132)-C(133) | 116.7(10) |
| C(131)-C(132)-C(137) | 120.2(9)  |
| C(133)-C(132)-C(137) | 122.8(10) |
| C(134)-C(133)-C(132) | 122.6(9)  |

# Supplementary Material (ESI) for Chemical Communications  
# This journal is © The Royal Society of Chemistry 2004

|                      |           |
|----------------------|-----------|
| C(135)-C(134)-C(133) | 115.5(8)  |
| C(135)-C(134)-C(138) | 126.4(10) |
| C(133)-C(134)-C(138) | 118.1(9)  |
| C(136)-C(135)-C(134) | 125.4(9)  |
| C(135)-C(136)-C(131) | 117.4(8)  |
| C(135)-C(136)-C(139) | 121.0(9)  |
| C(131)-C(136)-C(139) | 121.3(9)  |
| C(142)-C(141)-C(146) | 121.4(8)  |
| C(142)-C(141)-N(14)  | 120.9(9)  |
| C(146)-C(141)-N(14)  | 117.6(9)  |
| C(143)-C(142)-C(141) | 119.3(10) |
| C(143)-C(142)-C(147) | 119.3(9)  |
| C(141)-C(142)-C(147) | 120.9(9)  |
| C(142)-C(143)-C(144) | 121.8(9)  |
| C(143)-C(144)-C(145) | 119.3(8)  |
| C(143)-C(144)-C(148) | 122.3(10) |
| C(145)-C(144)-C(148) | 118.2(10) |
| C(144)-C(145)-C(146) | 119.9(9)  |
| C(141)-C(146)-C(145) | 117.7(8)  |
| C(141)-C(146)-C(149) | 123.2(7)  |
| C(145)-C(146)-C(149) | 119.0(8)  |
| C(200)-N(21)-N(22)   | 115.8(11) |
| C(211)-N(22)-N(21)   | 116.9(9)  |
| N(24)-C(200)-N(21)   | 119.3(11) |
| N(24)-C(200)-N(23)   | 106.2(9)  |
| N(21)-C(200)-N(23)   | 133.5(11) |
| C(200)-N(23)-C(201)  | 105.8(9)  |
| C(200)-N(23)-C(231)  | 127.9(15) |
| C(201)-N(23)-C(231)  | 126.3(15) |
| C(202)-C(201)-N(23)  | 108.7(11) |
| C(201)-C(202)-N(24)  | 106.6(11) |
| C(200)-N(24)-C(202)  | 111.2(11) |
| C(200)-N(24)-C(241)  | 123.6(13) |
| C(202)-N(24)-C(241)  | 125.2(13) |
| N(22)-C(211)-C(223)  | 133.8(9)  |

# Supplementary Material (ESI) for Chemical Communications  
# This journal is © The Royal Society of Chemistry 2004

|                      |           |
|----------------------|-----------|
| N(22)-C(211)-C(212)  | 120.1(9)  |
| C(223)-C(211)-C(212) | 106.1(8)  |
| C(217)-C(212)-C(213) | 119.4(9)  |
| C(217)-C(212)-C(211) | 108.1(8)  |
| C(213)-C(212)-C(211) | 132.5(10) |
| C(214)-C(213)-C(212) | 118.0(10) |
| C(215)-C(214)-C(213) | 123.2(10) |
| C(215)-C(214)-Cl(21) | 117.8(8)  |
| C(213)-C(214)-Cl(21) | 118.9(8)  |
| C(214)-C(215)-C(216) | 119.2(10) |
| C(217)-C(216)-C(215) | 118.3(11) |
| C(216)-C(217)-C(212) | 121.9(9)  |
| C(216)-C(217)-C(218) | 128.4(11) |
| C(212)-C(217)-C(218) | 109.5(9)  |
| C(219)-C(218)-C(223) | 115.3(10) |
| C(219)-C(218)-C(217) | 135.2(13) |
| C(223)-C(218)-C(217) | 105.5(10) |
| C(218)-C(219)-C(220) | 125.9(14) |
| C(219)-C(220)-C(221) | 113.7(11) |
| C(222)-C(221)-C(220) | 122.7(10) |
| C(222)-C(221)-Cl(22) | 118.6(9)  |
| C(220)-C(221)-Cl(22) | 117.0(9)  |
| C(221)-C(222)-C(223) | 116.9(11) |
| C(222)-C(223)-C(218) | 120.6(10) |
| C(222)-C(223)-C(211) | 129.6(9)  |
| C(218)-C(223)-C(211) | 108.7(8)  |
| C(236)-C(231)-C(232) | 122.9(13) |
| C(236)-C(231)-N(23)  | 120.6(15) |
| C(232)-C(231)-N(23)  | 116.4(15) |
| C(231)-C(232)-C(233) | 113.8(15) |
| C(231)-C(232)-C(237) | 120.2(14) |
| C(233)-C(232)-C(237) | 125.2(17) |
| C(234)-C(233)-C(232) | 125.0(16) |
| C(235)-C(234)-C(233) | 115.5(14) |
| C(235)-C(234)-C(238) | 122.9(18) |



# Supplementary Material (ESI) for Chemical Communications  
# This journal is © The Royal Society of Chemistry 2004

|                      |           |
|----------------------|-----------|
| C(233)-C(234)-C(238) | 121.2(18) |
| C(236)-C(235)-C(234) | 123.6(16) |
| C(235)-C(236)-C(231) | 118.8(15) |
| C(235)-C(236)-C(239) | 122.6(15) |
| C(231)-C(236)-C(239) | 118.4(13) |
| C(242)-C(241)-C(246) | 120.5(12) |
| C(242)-C(241)-N(24)  | 122.4(15) |
| C(246)-C(241)-N(24)  | 117.1(15) |
| C(243)-C(242)-C(241) | 120.1(15) |
| C(243)-C(242)-C(247) | 120.4(17) |
| C(241)-C(242)-C(247) | 119.5(17) |
| C(242)-C(243)-C(244) | 121.4(16) |
| C(243)-C(244)-C(245) | 120.3(14) |
| C(243)-C(244)-C(248) | 122.6(15) |
| C(245)-C(244)-C(248) | 116.7(15) |
| C(244)-C(245)-C(246) | 118.8(15) |
| C(241)-C(246)-C(245) | 118.3(14) |
| C(241)-C(246)-C(249) | 120.7(15) |
| C(245)-C(246)-C(249) | 120.2(16) |

---

Symmetry transformations used to generate equivalent atoms:

**Table 4.** Anisotropic displacement parameters ( $\text{\AA}^2 \times 10^3$ ) for **4**. The anisotropic displacement factor exponent takes the form:  $-2\pi^2 [h^2 a^{*2} U^{11} + \dots + 2 h k a^* b^* U^{12}]$

|        | U <sup>11</sup> | U <sup>22</sup> | U <sup>33</sup> | U <sup>23</sup> | U <sup>13</sup> | U <sup>12</sup> |
|--------|-----------------|-----------------|-----------------|-----------------|-----------------|-----------------|
| N(11)  | 14(2)           | 22(2)           | 50(3)           | -5(3)           | -3(3)           | -3(2)           |
| N(12)  | 14(3)           | 25(2)           | 45(2)           | -4(3)           | -3(3)           | -3(2)           |
| C(100) | 21(2)           | 16(3)           | 43(4)           | 9(4)            | -6(4)           | 2(2)            |
| N(13)  | 26(3)           | 26(3)           | 47(4)           | 1(3)            | 6(3)            | -5(2)           |
| C(101) | 36(4)           | 15(4)           | 48(5)           | 13(5)           | 0(5)            | -9(3)           |
| C(102) | 27(3)           | 18(4)           | 49(5)           | 18(4)           | -14(4)          | -7(3)           |
| N(14)  | 32(3)           | 24(3)           | 42(4)           | -3(3)           | 9(3)            | -7(2)           |
| C(111) | 11(2)           | 14(2)           | 53(3)           | -6(4)           | 6(3)            | -2(2)           |
| C(112) | 18(2)           | 21(3)           | 43(3)           | 9(4)            | -6(3)           | 5(2)            |
| C(113) | 44(4)           | 10(4)           | 50(3)           | 3(4)            | 6(3)            | -14(3)          |
| C(114) | 39(4)           | 13(3)           | 51(3)           | 3(4)            | -9(3)           | -1(3)           |
| Cl(11) | 67(1)           | 61(1)           | 55(1)           | -3(1)           | -5(1)           | -16(1)          |
| C(115) | 42(3)           | 31(5)           | 65(4)           | -6(5)           | -10(4)          | -12(3)          |
| C(116) | 17(3)           | 34(4)           | 62(4)           | 10(5)           | -12(4)          | 9(3)            |
| C(117) | 26(3)           | 15(3)           | 50(3)           | 1(4)            | -1(3)           | -4(2)           |
| C(118) | 15(2)           | 16(3)           | 48(4)           | 25(5)           | -3(4)           | 1(2)            |
| C(119) | 25(3)           | 18(4)           | 57(4)           | 10(5)           | 6(4)            | -12(3)          |
| C(120) | 30(3)           | 27(4)           | 47(4)           | 9(4)            | 23(3)           | 5(3)            |
| C(121) | 35(4)           | 45(5)           | 52(4)           | 2(4)            | 10(3)           | -8(3)           |
| Cl(12) | 64(1)           | 90(2)           | 52(2)           | -4(1)           | 7(1)            | -9(1)           |
| C(122) | 21(3)           | 32(4)           | 55(3)           | 8(5)            | -1(3)           | 7(3)            |
| C(123) | 16(3)           | 14(3)           | 48(3)           | 2(4)            | -2(3)           | -2(2)           |
| C(131) | 18(4)           | 27(3)           | 47(4)           | -7(4)           | 14(4)           | -2(3)           |
| C(132) | 25(5)           | 37(3)           | 57(6)           | -9(4)           | 11(6)           | 4(2)            |
| C(133) | 38(6)           | 37(3)           | 46(6)           | -15(4)          | 31(5)           | -5(3)           |
| C(134) | 36(5)           | 58(4)           | 30(5)           | -8(4)           | 33(4)           | 0(3)            |
| C(135) | 41(4)           | 43(3)           | 36(5)           | 5(4)            | 28(5)           | 0(3)            |
| C(136) | 24(4)           | 26(3)           | 40(5)           | 2(4)            | 27(4)           | -5(3)           |
| C(137) | 30(4)           | 20(4)           | 82(8)           | -12(7)          | 7(7)            | 1(3)            |
| C(138) | 63(6)           | 92(5)           | 26(5)           | -7(5)           | 41(5)           | 0(4)            |

# Supplementary Material (ESI) for Chemical Communications  
# This journal is © The Royal Society of Chemistry 2004

|        |       |       |       |        |        |        |
|--------|-------|-------|-------|--------|--------|--------|
| C(139) | 52(6) | 35(4) | 73(9) | -12(4) | 13(7)  | 9(3)   |
| C(141) | 34(3) | 23(3) | 41(4) | 4(3)   | 2(4)   | -1(2)  |
| C(142) | 30(3) | 17(3) | 68(7) | 12(5)  | -10(8) | -6(3)  |
| C(143) | 33(5) | 38(4) | 60(6) | 15(4)  | -25(6) | 5(3)   |
| C(144) | 41(3) | 43(5) | 53(6) | 14(4)  | -19(6) | -5(4)  |
| C(145) | 42(3) | 46(4) | 28(5) | -5(5)  | -11(6) | 8(3)   |
| C(146) | 39(3) | 36(4) | 27(6) | 1(4)   | -8(7)  | -1(3)  |
| C(147) | 26(5) | 34(4) | 72(7) | 6(5)   | -21(4) | 13(4)  |
| C(148) | 84(4) | 76(7) | 55(8) | 22(5)  | -11(9) | -13(5) |
| C(149) | 54(3) | 37(4) | 21(7) | -2(5)  | -5(6)  | 7(3)   |
| N(21)  | 14(2) | 22(2) | 50(3) | -5(3)  | -3(3)  | -3(2)  |
| N(22)  | 14(3) | 25(2) | 45(2) | -4(3)  | -3(3)  | -3(2)  |
| C(200) | 21(2) | 16(3) | 43(4) | 9(4)   | -6(4)  | 2(2)   |
| N(23)  | 26(3) | 26(3) | 47(4) | 1(3)   | 6(3)   | -5(2)  |
| C(201) | 36(4) | 15(4) | 48(5) | 13(5)  | 0(5)   | -9(3)  |
| C(202) | 27(3) | 18(4) | 49(5) | 18(4)  | -14(4) | -7(3)  |
| N(24)  | 32(3) | 24(3) | 42(4) | -3(3)  | 9(3)   | -7(2)  |
| C(211) | 11(2) | 14(2) | 53(3) | -6(4)  | 6(3)   | -2(2)  |
| C(212) | 16(3) | 14(3) | 48(3) | 2(4)   | -2(3)  | -2(2)  |
| C(213) | 21(3) | 32(4) | 55(3) | 8(5)   | -1(3)  | 7(3)   |
| C(214) | 35(4) | 45(5) | 52(4) | 2(4)   | 10(3)  | -8(3)  |
| Cl(21) | 64(1) | 90(2) | 52(2) | -4(1)  | 7(1)   | -9(1)  |
| C(215) | 30(3) | 27(4) | 47(4) | 9(4)   | 23(3)  | 5(3)   |
| C(216) | 25(3) | 18(4) | 57(4) | 10(5)  | 6(4)   | -12(3) |
| C(217) | 15(2) | 16(3) | 48(4) | 25(5)  | -3(4)  | 1(2)   |
| C(218) | 26(3) | 15(3) | 50(3) | 1(4)   | -1(3)  | -4(2)  |
| C(219) | 17(3) | 34(4) | 62(4) | 10(5)  | -12(4) | 9(3)   |
| C(220) | 42(3) | 31(5) | 65(4) | -6(5)  | -10(4) | -12(3) |
| C(221) | 39(4) | 13(3) | 51(3) | 3(4)   | -9(3)  | -1(3)  |
| Cl(22) | 67(1) | 61(1) | 55(1) | -3(1)  | -5(1)  | -16(1) |
| C(222) | 44(4) | 10(4) | 50(3) | 3(4)   | 6(3)   | -14(3) |
| C(223) | 18(2) | 21(3) | 43(3) | 9(4)   | -6(3)  | 5(2)   |
| C(231) | 34(3) | 23(3) | 41(4) | 4(3)   | 2(4)   | -1(2)  |
| C(232) | 30(3) | 17(3) | 68(7) | 12(5)  | -10(8) | -6(3)  |
| C(233) | 33(5) | 38(4) | 60(6) | 15(4)  | -25(6) | 5(3)   |

# Supplementary Material (ESI) for Chemical Communications  
# This journal is © The Royal Society of Chemistry 2004

|        |       |       |       |        |        |        |
|--------|-------|-------|-------|--------|--------|--------|
| C(234) | 41(3) | 43(5) | 53(6) | 14(4)  | -19(6) | -5(4)  |
| C(235) | 42(3) | 46(4) | 28(5) | -5(5)  | -11(6) | 8(3)   |
| C(236) | 39(3) | 36(4) | 27(6) | 1(4)   | -8(7)  | -1(3)  |
| C(237) | 26(5) | 34(4) | 72(7) | 6(5)   | -21(4) | 13(4)  |
| C(238) | 84(4) | 76(7) | 55(8) | 22(5)  | -11(9) | -13(5) |
| C(239) | 54(3) | 37(4) | 21(7) | -2(5)  | -5(6)  | 7(3)   |
| C(241) | 18(4) | 27(3) | 47(4) | -7(4)  | 14(4)  | -2(3)  |
| C(242) | 25(5) | 37(3) | 57(6) | -9(4)  | 11(6)  | 4(2)   |
| C(243) | 38(6) | 37(3) | 46(6) | -15(4) | 31(5)  | -5(3)  |
| C(244) | 36(5) | 58(4) | 30(5) | -8(4)  | 33(4)  | 0(3)   |
| C(245) | 41(4) | 43(3) | 36(5) | 5(4)   | 28(5)  | 0(3)   |
| C(246) | 24(4) | 26(3) | 40(5) | 2(4)   | 27(4)  | -5(3)  |
| C(247) | 30(4) | 20(4) | 82(8) | -12(7) | 7(7)   | 1(3)   |
| C(248) | 63(6) | 92(5) | 26(5) | -7(5)  | 41(5)  | 0(4)   |
| C(249) | 52(6) | 35(4) | 73(9) | -12(4) | 13(7)  | 9(3)   |

---

**Table 5.** Hydrogen coordinates ( $\times 10^4$ ) and isotropic displacement parameters ( $\text{\AA}^2 \times 10^3$ ) for **4**.

|        | x     | y     | z    | U(eq) |
|--------|-------|-------|------|-------|
| H(101) | 15589 | 13037 | 2787 | 40    |
| H(102) | 15695 | 13005 | 3749 | 38    |
| H(113) | 11214 | 9368  | 1923 | 42    |
| H(115) | 7836  | 7735  | 1709 | 55    |
| H(116) | 7423  | 7791  | 2620 | 45    |
| H(119) | 7612  | 7875  | 3686 | 40    |
| H(120) | 8196  | 7893  | 4567 | 42    |
| H(122) | 11505 | 9497  | 4180 | 43    |
| H(133) | 14177 | 9241  | 1500 | 49    |
| H(134) | 12426 | 12364 | 1271 | 48    |
| H(37A) | 15334 | 8856  | 2308 | 66    |
| H(37B) | 14508 | 9299  | 2788 | 66    |
| H(37C) | 15756 | 9997  | 2635 | 66    |
| H(38A) | 12790 | 10958 | 513  | 90    |
| H(38B) | 12146 | 9808  | 763  | 90    |
| H(38C) | 13600 | 9789  | 624  | 90    |
| H(39A) | 12014 | 13766 | 1963 | 80    |
| H(39B) | 13412 | 14025 | 2149 | 80    |
| H(39C) | 12433 | 13441 | 2542 | 80    |
| H(143) | 14593 | 9189  | 5046 | 52    |
| H(145) | 12691 | 12256 | 5355 | 47    |
| H(47A) | 15879 | 10057 | 3870 | 66    |
| H(47B) | 14836 | 9043  | 3831 | 66    |
| H(47C) | 15846 | 9004  | 4288 | 66    |
| H(48A) | 12321 | 9909  | 5845 | 108   |
| H(48B) | 13333 | 10816 | 6073 | 108   |
| H(48C) | 13736 | 9490  | 5920 | 108   |
| H(49A) | 13533 | 13887 | 4348 | 56    |
| H(49B) | 12337 | 13709 | 4712 | 56    |

# Supplementary Material (ESI) for Chemical Communications  
# This journal is © The Royal Society of Chemistry 2004

|        |       |       |      |     |
|--------|-------|-------|------|-----|
| H(49C) | 12298 | 13286 | 4118 | 56  |
| H(201) | 15514 | 13249 | 3588 | 40  |
| H(202) | 15505 | 13226 | 2626 | 38  |
| H(21A) | 11322 | 9361  | 4537 | 43  |
| H(21B) | 7948  | 7664  | 4792 | 42  |
| H(21C) | 7520  | 7671  | 3873 | 40  |
| H(21D) | 7733  | 7666  | 2796 | 45  |
| H(22A) | 7990  | 8157  | 1907 | 55  |
| H(22B) | 11333 | 9702  | 2285 | 42  |
| H(233) | 14331 | 9244  | 4901 | 52  |
| H(235) | 12509 | 12326 | 5146 | 47  |
| H(37D) | 15474 | 8861  | 4043 | 66  |
| H(37E) | 15632 | 9952  | 3649 | 66  |
| H(37F) | 14384 | 9170  | 3640 | 66  |
| H(39D) | 12239 | 10382 | 5734 | 108 |
| H(38E) | 13567 | 10833 | 5938 | 108 |
| H(38F) | 13414 | 9505  | 5723 | 108 |
| H(39D) | 12107 | 13729 | 4439 | 56  |
| H(39E) | 12510 | 13336 | 3865 | 56  |
| H(39F) | 13473 | 14038 | 4228 | 56  |
| H(243) | 14454 | 9194  | 1357 | 49  |
| H(245) | 12487 | 12257 | 1090 | 48  |
| H(47D) | 15471 | 8789  | 2153 | 66  |
| H(47E) | 14604 | 9192  | 2627 | 66  |
| H(47F) | 15852 | 9915  | 2499 | 66  |
| H(48D) | 12216 | 10217 | 548  | 90  |
| H(48E) | 13493 | 9488  | 500  | 90  |
| H(48F) | 13434 | 10849 | 318  | 90  |
| H(49D) | 13229 | 14062 | 1837 | 80  |
| H(49E) | 13005 | 13472 | 2395 | 80  |
| H(49F) | 11929 | 13427 | 1965 | 80  |

---

**Table 1.** Crystal data and structure refinement for **5**.

|                                   |                                                |          |
|-----------------------------------|------------------------------------------------|----------|
| Identification code               | <b>5</b>                                       |          |
| Empirical formula                 | C <sub>24</sub> H <sub>28</sub> N <sub>4</sub> |          |
| Formula weight                    | 372.50                                         |          |
| Temperature                       | 173(2) K                                       |          |
| Wavelength                        | 0.71069 Å                                      |          |
| Crystal system                    | Orthorhombic                                   |          |
| Space group                       | Pbca                                           |          |
| Unit cell dimensions              | a = 11.0490(6) Å                               | α = 90°. |
|                                   | b = 18.8681(10) Å                              | β = 90°. |
|                                   | c = 19.8287(10) Å                              | γ = 90°. |
| Volume                            | 4133.8(4) Å <sup>3</sup>                       |          |
| Z                                 | 8                                              |          |
| Density (calculated)              | 1.197 Mg/m <sup>3</sup>                        |          |
| Absorption coefficient            | 0.072 mm <sup>-1</sup>                         |          |
| F(000)                            | 1600                                           |          |
| Crystal size                      | 0.40 x 0.30 x 0.20 mm <sup>3</sup>             |          |
| Theta range for data collection   | 2.05 to 27.54°.                                |          |
| Index ranges                      | -13 ≤ h ≤ 14, -24 ≤ k ≤ 24, -25 ≤ l ≤ 25       |          |
| Reflections collected             | 38365                                          |          |
| Independent reflections           | 4770 [R(int) = 0.1136]                         |          |
| Completeness to theta = 27.54°    | 99.9 %                                         |          |
| Absorption correction             | None                                           |          |
| Refinement method                 | Full-matrix least-squares on F <sup>2</sup>    |          |
| Data / restraints / parameters    | 4770 / 0 / 269                                 |          |
| Goodness-of-fit on F <sup>2</sup> | 1.006                                          |          |
| Final R indices [I > 2σ(I)]       | R1 = 0.0600, wR2 = 0.1244                      |          |
| R indices (all data)              | R1 = 0.1237, wR2 = 0.1495                      |          |
| Largest diff. peak and hole       | 0.240 and -0.267 e.Å <sup>-3</sup>             |          |

# Supplementary Material (ESI) for Chemical Communications  
# This journal is © The Royal Society of Chemistry 2004

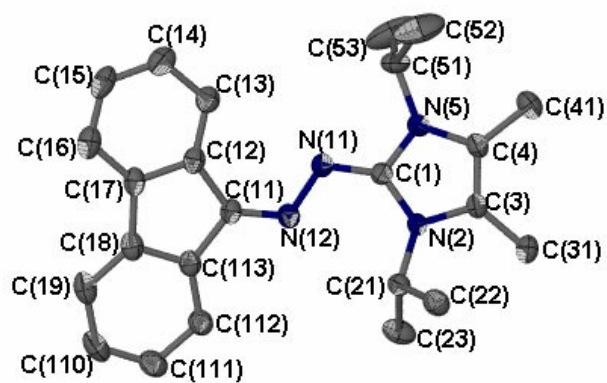

ORTEP Diagram of 5

Hydrogen atoms are removed for clarity. Thermal ellipsoids are shown at 50% probability level.



**Table 2.** Atomic coordinates ( $\times 10^4$ ) and equivalent isotropic displacement parameters ( $\text{\AA}^2 \times 10^3$ ) for **5**.  $U(\text{eq})$  is defined as one third of the trace of the orthogonalized  $U^{ij}$  tensor.

|        | x        | y       | z       | U(eq)  |
|--------|----------|---------|---------|--------|
| C(1)   | 10796(2) | 1054(1) | 914(1)  | 31(1)  |
| C(3)   | 12241(2) | 290(1)  | 579(1)  | 31(1)  |
| C(4)   | 12649(2) | 946(1)  | 460(1)  | 34(1)  |
| C(11)  | 7843(2)  | 1281(1) | 1426(1) | 32(1)  |
| C(12)  | 7613(2)  | 2005(1) | 1667(1) | 33(1)  |
| C(13)  | 8315(2)  | 2618(1) | 1664(1) | 38(1)  |
| C(14)  | 7825(2)  | 3241(1) | 1920(1) | 45(1)  |
| C(15)  | 6657(2)  | 3257(1) | 2172(1) | 49(1)  |
| C(16)  | 5946(2)  | 2656(1) | 2174(1) | 47(1)  |
| C(17)  | 6419(2)  | 2030(1) | 1924(1) | 36(1)  |
| C(18)  | 5871(2)  | 1326(1) | 1848(1) | 38(1)  |
| C(19)  | 4741(2)  | 1066(2) | 2032(1) | 45(1)  |
| C(21)  | 10436(2) | -222(1) | 1243(1) | 32(1)  |
| C(22)  | 11224(2) | -541(1) | 1790(1) | 41(1)  |
| C(23)  | 9907(2)  | -765(1) | 764(1)  | 48(1)  |
| C(31)  | 12808(2) | -400(1) | 383(1)  | 41(1)  |
| C(41)  | 13826(2) | 1164(1) | 153(1)  | 47(1)  |
| C(51)  | 11776(2) | 2205(1) | 661(1)  | 49(1)  |
| C(52)  | 12662(4) | 2502(2) | 1142(2) | 93(1)  |
| C(53)  | 11688(4) | 2509(2) | -17(2)  | 100(2) |
| C(110) | 4463(2)  | 370(2)  | 1881(1) | 49(1)  |
| C(111) | 5293(2)  | -68(2)  | 1555(1) | 46(1)  |
| C(112) | 6432(2)  | 181(1)  | 1388(1) | 39(1)  |
| C(113) | 6725(2)  | 882(1)  | 1533(1) | 33(1)  |
| N(2)   | 11085(2) | 349(1)  | 876(1)  | 29(1)  |
| N(5)   | 11760(2) | 1420(1) | 672(1)  | 35(1)  |
| N(11)  | 9806(2)  | 1399(1) | 1128(1) | 34(1)  |
| N(12)  | 8814(2)  | 982(1)  | 1176(1) | 33(1)  |

**Table 3.** Bond lengths [Å] and angles [°] for **5**.

---

|                 |            |
|-----------------|------------|
| C(1)-N(11)      | 1.341(3)   |
| C(1)-N(5)       | 1.359(3)   |
| C(1)-N(2)       | 1.370(3)   |
| C(3)-C(4)       | 1.338(3)   |
| C(3)-N(2)       | 1.410(3)   |
| C(3)-C(31)      | 1.497(3)   |
| C(4)-N(5)       | 1.394(3)   |
| C(4)-C(41)      | 1.494(3)   |
| C(11)-N(12)     | 1.310(3)   |
| C(11)-C(113)    | 1.461(3)   |
| C(11)-C(12)     | 1.470(3)   |
| C(12)-C(13)     | 1.392(3)   |
| C(12)-C(17)     | 1.415(3)   |
| C(13)-C(14)     | 1.391(3)   |
| C(14)-C(15)     | 1.384(4)   |
| C(15)-C(16)     | 1.380(4)   |
| C(16)-C(17)     | 1.384(3)   |
| C(17)-C(18)     | 1.467(3)   |
| C(18)-C(19)     | 1.390(3)   |
| C(18)-C(113)    | 1.408(3)   |
| C(19)-C(110)    | 1.381(4)   |
| C(21)-N(2)      | 1.485(3)   |
| C(21)-C(23)     | 1.515(3)   |
| C(21)-C(22)     | 1.516(3)   |
| C(51)-C(53)     | 1.463(4)   |
| C(51)-C(52)     | 1.477(4)   |
| C(51)-N(5)      | 1.481(3)   |
| C(110)-C(111)   | 1.393(4)   |
| C(111)-C(112)   | 1.385(3)   |
| C(112)-C(113)   | 1.393(3)   |
| N(11)-N(12)     | 1.353(2)   |
| <br>            |            |
| N(11)-C(1)-N(5) | 120.23(19) |

# Supplementary Material (ESI) for Chemical Communications  
# This journal is © The Royal Society of Chemistry 2004

|                      |            |
|----------------------|------------|
| N(11)-C(1)-N(2)      | 132.8(2)   |
| N(5)-C(1)-N(2)       | 106.95(18) |
| C(4)-C(3)-N(2)       | 107.85(18) |
| C(4)-C(3)-C(31)      | 128.12(19) |
| N(2)-C(3)-C(31)      | 123.78(19) |
| C(3)-C(4)-N(5)       | 107.63(18) |
| C(3)-C(4)-C(41)      | 128.4(2)   |
| N(5)-C(4)-C(41)      | 124.0(2)   |
| N(12)-C(11)-C(113)   | 121.71(19) |
| N(12)-C(11)-C(12)    | 131.7(2)   |
| C(113)-C(11)-C(12)   | 106.52(18) |
| C(13)-C(12)-C(17)    | 119.6(2)   |
| C(13)-C(12)-C(11)    | 132.3(2)   |
| C(17)-C(12)-C(11)    | 108.0(2)   |
| C(14)-C(13)-C(12)    | 118.9(2)   |
| C(15)-C(14)-C(13)    | 120.9(3)   |
| C(16)-C(15)-C(14)    | 121.0(2)   |
| C(15)-C(16)-C(17)    | 119.0(2)   |
| C(16)-C(17)-C(12)    | 120.6(2)   |
| C(16)-C(17)-C(18)    | 130.8(2)   |
| C(12)-C(17)-C(18)    | 108.51(19) |
| C(19)-C(18)-C(113)   | 120.5(2)   |
| C(19)-C(18)-C(17)    | 131.6(2)   |
| C(113)-C(18)-C(17)   | 107.91(19) |
| C(110)-C(19)-C(18)   | 118.7(2)   |
| N(2)-C(21)-C(23)     | 111.67(19) |
| N(2)-C(21)-C(22)     | 111.20(17) |
| C(23)-C(21)-C(22)    | 113.67(19) |
| C(53)-C(51)-C(52)    | 119.3(3)   |
| C(53)-C(51)-N(5)     | 113.8(2)   |
| C(52)-C(51)-N(5)     | 112.2(2)   |
| C(19)-C(110)-C(111)  | 121.2(2)   |
| C(112)-C(111)-C(110) | 120.5(3)   |
| C(111)-C(112)-C(113) | 119.0(2)   |
| C(112)-C(113)-C(18)  | 120.1(2)   |

# Supplementary Material (ESI) for Chemical Communications  
# This journal is © The Royal Society of Chemistry 2004

|                     |            |
|---------------------|------------|
| C(112)-C(113)-C(11) | 130.9(2)   |
| C(18)-C(113)-C(11)  | 109.0(2)   |
| C(1)-N(2)-C(3)      | 108.11(17) |
| C(1)-N(2)-C(21)     | 124.31(17) |
| C(3)-N(2)-C(21)     | 125.85(17) |
| C(1)-N(5)-C(4)      | 109.41(17) |
| C(1)-N(5)-C(51)     | 121.60(19) |
| C(4)-N(5)-C(51)     | 128.99(19) |
| C(1)-N(11)-N(12)    | 113.59(18) |
| C(11)-N(12)-N(11)   | 116.09(18) |

---

Symmetry transformations used to generate equivalent atoms:

**Table 4.** Anisotropic displacement parameters ( $\text{\AA}^2 \times 10^3$ ) for **5**. The anisotropic displacement factor exponent takes the form:  $-2\pi^2 [h^2 a^{*2} U^{11} + \dots + 2 h k a^* b^* U^{12}]$

|        | U <sup>11</sup> | U <sup>22</sup> | U <sup>33</sup> | U <sup>23</sup> | U <sup>13</sup> | U <sup>12</sup> |
|--------|-----------------|-----------------|-----------------|-----------------|-----------------|-----------------|
| C(1)   | 28(1)           | 29(1)           | 36(1)           | -3(1)           | -3(1)           | 0(1)            |
| C(3)   | 26(1)           | 37(1)           | 30(1)           | 1(1)            | 0(1)            | 1(1)            |
| C(4)   | 27(1)           | 40(1)           | 36(1)           | 2(1)            | 1(1)            | -1(1)           |
| C(11)  | 29(1)           | 36(1)           | 32(1)           | 0(1)            | -2(1)           | 5(1)            |
| C(12)  | 31(1)           | 39(1)           | 29(1)           | -3(1)           | -5(1)           | 6(1)            |
| C(13)  | 35(1)           | 41(1)           | 38(1)           | -3(1)           | -6(1)           | 3(1)            |
| C(14)  | 49(2)           | 42(1)           | 45(2)           | -8(1)           | -12(1)          | 6(1)            |
| C(15)  | 49(2)           | 48(2)           | 52(2)           | -15(1)          | -9(1)           | 19(1)           |
| C(16)  | 41(2)           | 58(2)           | 44(2)           | -7(1)           | 0(1)            | 13(1)           |
| C(17)  | 29(1)           | 46(1)           | 33(1)           | -3(1)           | -4(1)           | 7(1)            |
| C(18)  | 32(1)           | 51(2)           | 30(1)           | 2(1)            | -2(1)           | 5(1)            |
| C(19)  | 30(1)           | 66(2)           | 39(1)           | 2(1)            | 1(1)            | 4(1)            |
| C(21)  | 29(1)           | 31(1)           | 35(1)           | 4(1)            | 0(1)            | -2(1)           |
| C(22)  | 40(1)           | 47(1)           | 36(1)           | 7(1)            | 2(1)            | -3(1)           |
| C(23)  | 52(2)           | 51(2)           | 42(2)           | 3(1)            | -8(1)           | -19(1)          |
| C(31)  | 34(1)           | 44(1)           | 44(1)           | -3(1)           | 3(1)            | 7(1)            |
| C(41)  | 37(1)           | 53(2)           | 53(2)           | 3(1)            | 9(1)            | -5(1)           |
| C(51)  | 47(2)           | 31(1)           | 67(2)           | 3(1)            | -1(1)           | -7(1)           |
| C(52)  | 158(4)          | 43(2)           | 79(2)           | -15(2)          | -25(2)          | -11(2)          |
| C(53)  | 198(5)          | 40(2)           | 62(2)           | 7(2)            | -24(3)          | 11(2)           |
| C(110) | 30(1)           | 70(2)           | 48(2)           | 13(1)           | -2(1)           | -9(1)           |
| C(111) | 37(1)           | 51(2)           | 49(2)           | 8(1)            | -9(1)           | -8(1)           |
| C(112) | 34(1)           | 42(1)           | 41(1)           | 2(1)            | -3(1)           | -1(1)           |
| C(113) | 29(1)           | 41(1)           | 30(1)           | 1(1)            | -3(1)           | 3(1)            |
| N(2)   | 24(1)           | 30(1)           | 34(1)           | 1(1)            | 2(1)            | 1(1)            |
| N(5)   | 30(1)           | 31(1)           | 45(1)           | 0(1)            | 2(1)            | -3(1)           |
| N(11)  | 29(1)           | 33(1)           | 41(1)           | -1(1)           | 0(1)            | 2(1)            |
| N(12)  | 28(1)           | 36(1)           | 35(1)           | -1(1)           | -2(1)           | 0(1)            |

**Table 5.** Hydrogen coordinates ( $\times 10^4$ ) and isotropic displacement parameters ( $\text{\AA}^2 \times 10^3$ ) for **5**.

|        | x         | y        | z       | U(eq) |
|--------|-----------|----------|---------|-------|
| H(13)  | 9110(20)  | 2610(1)  | 1491(5) | 45    |
| H(14)  | 8334(13)  | 3694(12) | 1922(1) | 54    |
| H(15)  | 6337(9)   | 3694(12) | 2349(5) | 59    |
| H(16)  | 5160(20)  | 2672(1)  | 2342(5) | 57    |
| H(19)  | 4172(16)  | 1360(8)  | 2256(6) | 54    |
| H(21)  | 9751(17)  | 4(6)     | 1471(6) | 38    |
| H(22A) | 11914     | -784     | 1584    | 62    |
| H(22B) | 10748     | -882     | 2053    | 62    |
| H(22C) | 11518     | -164     | 2088    | 62    |
| H(23A) | 9352      | -530     | 450     | 73    |
| H(23B) | 9466      | -1125    | 1021    | 73    |
| H(23C) | 10562     | -991     | 509     | 73    |
| H(31A) | 13584     | -310     | 159     | 61    |
| H(31B) | 12269     | -654     | 73      | 61    |
| H(31C) | 12942     | -688     | 787     | 61    |
| H(41A) | 14259     | 743      | -7      | 71    |
| H(41B) | 14318     | 1409     | 491     | 71    |
| H(41C) | 13673     | 1483     | -228    | 71    |
| H(51)  | 10950(20) | 2338(4)  | 877(6)  | 58    |
| H(52A) | 13482     | 2442     | 961     | 140   |
| H(52B) | 12596     | 2253     | 1574    | 140   |
| H(52C) | 12497     | 3007     | 1209    | 140   |
| H(53A) | 12413     | 2385     | -276    | 150   |
| H(53B) | 11622     | 3025     | 16      | 150   |
| H(53C) | 10970     | 2319     | -244    | 150   |
| H(110) | 3680(20)  | 184(5)   | 2003(4) | 59    |
| H(111) | 5062(6)   | -569(13) | 1441(3) | 55    |
| H(112) | 7021(15)  | -130(8)  | 1171(6) | 47    |

**Table 1.** Crystal data and structure refinement for **6**

|                                   |                                                |                   |
|-----------------------------------|------------------------------------------------|-------------------|
| Identification code               | <b>6</b>                                       |                   |
| Empirical formula                 | C <sub>52</sub> H <sub>56</sub> N <sub>8</sub> |                   |
| Formula weight                    | 793.05                                         |                   |
| Temperature                       | 173(2) K                                       |                   |
| Wavelength                        | 0.71069 Å                                      |                   |
| Crystal system                    | Triclinic                                      |                   |
| Space group                       | P-1                                            |                   |
| Unit cell dimensions              | a = 9.4223(6) Å                                | α = 79.4400(10)°. |
|                                   | b = 15.6479(10) Å                              | β = 82.2910(10)°. |
|                                   | c = 16.0880(10) Å                              | γ = 74.5940(10)°. |
| Volume                            | 2238.9(2) Å <sup>3</sup>                       |                   |
| Z                                 | 2                                              |                   |
| Density (calculated)              | 1.176 Mg/m <sup>3</sup>                        |                   |
| Absorption coefficient            | 0.071 mm <sup>-1</sup>                         |                   |
| F(000)                            | 848                                            |                   |
| Crystal size                      | 0.40 x 0.40 x 0.30 mm <sup>3</sup>             |                   |
| Theta range for data collection   | 1.73 to 27.60°.                                |                   |
| Index ranges                      | -12 ≤ h ≤ 12, -20 ≤ k ≤ 20, -20 ≤ l ≤ 20       |                   |
| Reflections collected             | 22193                                          |                   |
| Independent reflections           | 10308 [R(int) = 0.0562]                        |                   |
| Completeness to theta = 27.60°    | 99.2 %                                         |                   |
| Absorption correction             | None                                           |                   |
| Refinement method                 | Full-matrix least-squares on F <sup>2</sup>    |                   |
| Data / restraints / parameters    | 10308 / 0 / 541                                |                   |
| Goodness-of-fit on F <sup>2</sup> | 0.946                                          |                   |
| Final R indices [I > 2σ(I)]       | R1 = 0.0650, wR2 = 0.1357                      |                   |
| R indices (all data)              | R1 = 0.1587, wR2 = 0.1699                      |                   |
| Largest diff. peak and hole       | 0.219 and -0.162 e.Å <sup>-3</sup>             |                   |

# Supplementary Material (ESI) for Chemical Communications  
# This journal is © The Royal Society of Chemistry 2004

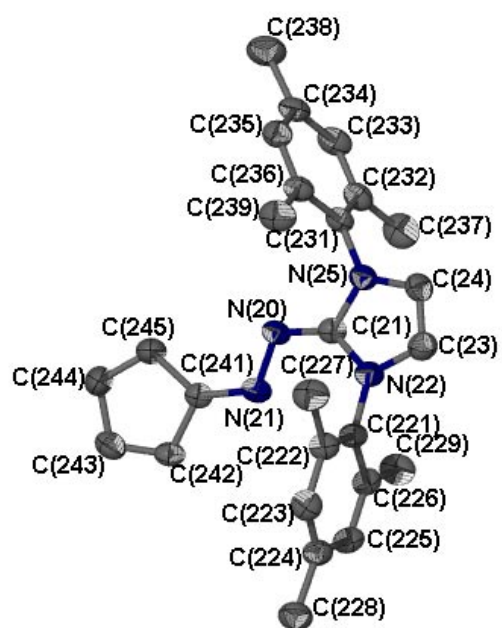

ORTEP Diagram of 6

Hydrogen atoms have been removed for clarity. Thermal ellipsoids are shown at 50% probability level.



**Table 2.** Atomic coordinates ( $\times 10^4$ ) and equivalent isotropic displacement parameters ( $\text{\AA}^2 \times 10^3$ ) for **6** U(eq) is defined as one third of the trace of the orthogonalized  $U^{ij}$  tensor.

|        | x       | y        | z       | U(eq) |
|--------|---------|----------|---------|-------|
| C(11)  | 5989(3) | 2087(2)  | 5656(2) | 40(1) |
| C(13)  | 7234(3) | 2061(2)  | 6755(2) | 55(1) |
| C(14)  | 7891(3) | 1329(2)  | 6414(2) | 55(1) |
| C(21)  | 6743(3) | 1944(2)  | 751(2)  | 40(1) |
| C(23)  | 4974(3) | 1785(2)  | 1801(2) | 51(1) |
| C(24)  | 6218(3) | 1222(2)  | 2045(2) | 51(1) |
| C(121) | 5241(3) | 3436(2)  | 6409(2) | 39(1) |
| C(122) | 3974(3) | 3550(2)  | 6954(2) | 42(1) |
| C(123) | 3258(3) | 4422(2)  | 7075(2) | 43(1) |
| C(124) | 3795(3) | 5146(2)  | 6676(2) | 44(1) |
| C(125) | 5079(3) | 4992(2)  | 6149(2) | 45(1) |
| C(126) | 5846(3) | 4133(2)  | 6008(2) | 43(1) |
| C(127) | 3392(3) | 2769(2)  | 7395(2) | 62(1) |
| C(128) | 2970(3) | 6089(2)  | 6804(2) | 57(1) |
| C(129) | 7277(3) | 3975(2)  | 5458(2) | 59(1) |
| C(131) | 7468(3) | 669(2)   | 5181(2) | 41(1) |
| C(132) | 8317(3) | 813(2)   | 4427(2) | 44(1) |
| C(133) | 8570(3) | 179(2)   | 3885(2) | 46(1) |
| C(134) | 8019(3) | -573(2)  | 4095(2) | 49(1) |
| C(135) | 7203(3) | -697(2)  | 4861(2) | 55(1) |
| C(136) | 6899(3) | -74(2)   | 5421(2) | 49(1) |
| C(137) | 8973(3) | 1606(2)  | 4200(2) | 67(1) |
| C(138) | 8278(4) | -1250(2) | 3497(2) | 72(1) |
| C(139) | 6008(4) | -234(2)  | 6256(2) | 70(1) |
| C(141) | 2988(3) | 3158(2)  | 4583(2) | 44(1) |
| C(142) | 1559(3) | 3778(2)  | 4666(2) | 57(1) |
| C(143) | 973(4)  | 3951(2)  | 3928(2) | 72(1) |
| C(144) | 2008(4) | 3456(2)  | 3335(2) | 73(1) |
| C(145) | 3213(3) | 2979(2)  | 3719(2) | 57(1) |
| C(221) | 4237(3) | 2999(2)  | 591(2)  | 40(1) |

# Supplementary Material (ESI) for Chemical Communications  
# This journal is © The Royal Society of Chemistry 2004

|        |          |         |          |       |
|--------|----------|---------|----------|-------|
| C(222) | 4184(3)  | 3838(2) | 776(2)   | 45(1) |
| C(223) | 3231(3)  | 4576(2) | 357(2)   | 50(1) |
| C(224) | 2341(3)  | 4488(2) | -220(2)  | 47(1) |
| C(225) | 2392(3)  | 3638(2) | -360(2)  | 48(1) |
| C(226) | 3336(3)  | 2879(2) | 36(2)    | 42(1) |
| C(227) | 5161(3)  | 3947(2) | 1395(2)  | 63(1) |
| C(228) | 1361(3)  | 5303(2) | -699(2)  | 62(1) |
| C(229) | 3419(3)  | 1969(2) | -160(2)  | 59(1) |
| C(231) | 8854(3)  | 847(2)  | 1408(2)  | 41(1) |
| C(232) | 9304(3)  | -19(2)  | 1213(2)  | 46(1) |
| C(233) | 10785(3) | -447(2) | 1221(2)  | 52(1) |
| C(234) | 11804(3) | -46(2)  | 1416(2)  | 49(1) |
| C(235) | 11307(3) | 818(2)  | 1614(2)  | 49(1) |
| C(236) | 9851(3)  | 1279(2) | 1607(2)  | 44(1) |
| C(237) | 8232(4)  | -473(2) | 975(2)   | 68(1) |
| C(238) | 13431(3) | -504(2) | 1377(2)  | 75(1) |
| C(239) | 9348(3)  | 2229(2) | 1781(2)  | 63(1) |
| C(241) | 7542(3)  | 3130(2) | -1152(2) | 38(1) |
| C(242) | 6847(3)  | 3758(2) | -1847(2) | 43(1) |
| C(243) | 7872(3)  | 4099(2) | -2330(2) | 55(1) |
| C(244) | 9265(3)  | 3701(2) | -1979(2) | 77(1) |
| C(245) | 9076(3)  | 3125(2) | -1275(2) | 65(1) |
| N(10)  | 5120(2)  | 2266(1) | 5035(1)  | 42(1) |
| N(11)  | 3847(2)  | 2878(1) | 5202(1)  | 42(1) |
| N(12)  | 6058(2)  | 2533(1) | 6294(1)  | 43(1) |
| N(15)  | 7133(2)  | 1339(1) | 5734(1)  | 46(1) |
| N(20)  | 7589(2)  | 2195(1) | 80(1)    | 41(1) |
| N(21)  | 6784(2)  | 2736(1) | -538(1)  | 40(1) |
| N(22)  | 5272(2)  | 2237(1) | 997(1)   | 43(1) |
| N(25)  | 7324(2)  | 1313(1) | 1400(1)  | 43(1) |

---

**Table 3.** Bond lengths [Å] and angles [°] for **6**.

---

|               |          |
|---------------|----------|
| C(11)-N(10)   | 1.321(3) |
| C(11)-N(12)   | 1.360(3) |
| C(11)-N(15)   | 1.363(3) |
| C(13)-C(14)   | 1.327(3) |
| C(13)-N(12)   | 1.381(3) |
| C(14)-N(15)   | 1.380(3) |
| C(21)-N(20)   | 1.318(3) |
| C(21)-N(25)   | 1.361(3) |
| C(21)-N(22)   | 1.368(3) |
| C(23)-C(24)   | 1.324(4) |
| C(23)-N(22)   | 1.387(3) |
| C(24)-N(25)   | 1.385(3) |
| C(121)-C(122) | 1.375(3) |
| C(121)-C(126) | 1.380(3) |
| C(121)-N(12)  | 1.449(3) |
| C(122)-C(123) | 1.389(3) |
| C(122)-C(127) | 1.493(4) |
| C(123)-C(124) | 1.379(4) |
| C(124)-C(125) | 1.372(4) |
| C(124)-C(128) | 1.511(3) |
| C(125)-C(126) | 1.391(3) |
| C(126)-C(129) | 1.499(3) |
| C(131)-C(132) | 1.378(3) |
| C(131)-C(136) | 1.378(4) |
| C(131)-N(15)  | 1.444(3) |
| C(132)-C(133) | 1.392(3) |
| C(132)-C(137) | 1.496(4) |
| C(133)-C(134) | 1.379(4) |
| C(134)-C(135) | 1.373(4) |
| C(134)-C(138) | 1.510(4) |
| C(135)-C(136) | 1.395(4) |
| C(136)-C(139) | 1.504(4) |
| C(141)-N(11)  | 1.306(3) |

# Supplementary Material (ESI) for Chemical Communications  
# This journal is © The Royal Society of Chemistry 2004

|               |          |
|---------------|----------|
| C(141)-C(142) | 1.441(4) |
| C(141)-C(145) | 1.445(4) |
| C(142)-C(143) | 1.329(4) |
| C(143)-C(144) | 1.443(4) |
| C(144)-C(145) | 1.340(4) |
| C(221)-C(226) | 1.379(3) |
| C(221)-C(222) | 1.385(3) |
| C(221)-N(22)  | 1.438(3) |
| C(222)-C(223) | 1.385(4) |
| C(222)-C(227) | 1.504(4) |
| C(223)-C(224) | 1.379(4) |
| C(224)-C(225) | 1.376(4) |
| C(224)-C(228) | 1.509(4) |
| C(225)-C(226) | 1.386(4) |
| C(226)-C(229) | 1.494(4) |
| C(231)-C(232) | 1.390(3) |
| C(231)-C(236) | 1.393(4) |
| C(231)-N(25)  | 1.433(3) |
| C(232)-C(233) | 1.379(4) |
| C(232)-C(237) | 1.502(4) |
| C(233)-C(234) | 1.373(4) |
| C(234)-C(235) | 1.389(4) |
| C(234)-C(238) | 1.507(4) |
| C(235)-C(236) | 1.370(3) |
| C(236)-C(239) | 1.502(3) |
| C(241)-N(21)  | 1.299(3) |
| C(241)-C(245) | 1.431(4) |
| C(241)-C(242) | 1.448(3) |
| C(242)-C(243) | 1.320(4) |
| C(243)-C(244) | 1.437(4) |
| C(244)-C(245) | 1.336(4) |
| N(10)-N(11)   | 1.351(3) |
| N(20)-N(21)   | 1.354(3) |

N(10)-C(11)-N(12) 133.1(2)

# Supplementary Material (ESI) for Chemical Communications  
# This journal is © The Royal Society of Chemistry 2004

|                      |          |
|----------------------|----------|
| N(10)-C(11)-N(15)    | 121.4(2) |
| N(12)-C(11)-N(15)    | 105.5(2) |
| C(14)-C(13)-N(12)    | 108.0(2) |
| C(13)-C(14)-N(15)    | 107.4(2) |
| N(20)-C(21)-N(25)    | 121.1(2) |
| N(20)-C(21)-N(22)    | 132.6(2) |
| N(25)-C(21)-N(22)    | 106.1(2) |
| C(24)-C(23)-N(22)    | 108.3(2) |
| C(23)-C(24)-N(25)    | 107.7(2) |
| C(122)-C(121)-C(126) | 123.4(2) |
| C(122)-C(121)-N(12)  | 118.9(2) |
| C(126)-C(121)-N(12)  | 117.5(2) |
| C(121)-C(122)-C(123) | 117.1(2) |
| C(121)-C(122)-C(127) | 121.4(2) |
| C(123)-C(122)-C(127) | 121.5(2) |
| C(124)-C(123)-C(122) | 121.9(2) |
| C(125)-C(124)-C(123) | 118.6(2) |
| C(125)-C(124)-C(128) | 120.8(3) |
| C(123)-C(124)-C(128) | 120.6(3) |
| C(124)-C(125)-C(126) | 122.0(3) |
| C(121)-C(126)-C(125) | 116.9(2) |
| C(121)-C(126)-C(129) | 121.8(2) |
| C(125)-C(126)-C(129) | 121.2(3) |
| C(132)-C(131)-C(136) | 123.0(2) |
| C(132)-C(131)-N(15)  | 118.2(2) |
| C(136)-C(131)-N(15)  | 118.7(2) |
| C(131)-C(132)-C(133) | 117.4(3) |
| C(131)-C(132)-C(137) | 121.8(2) |
| C(133)-C(132)-C(137) | 120.8(3) |
| C(134)-C(133)-C(132) | 121.7(3) |
| C(135)-C(134)-C(133) | 118.8(2) |
| C(135)-C(134)-C(138) | 119.8(3) |
| C(133)-C(134)-C(138) | 121.4(3) |
| C(134)-C(135)-C(136) | 121.7(3) |
| C(131)-C(136)-C(135) | 117.4(3) |

# Supplementary Material (ESI) for Chemical Communications  
# This journal is © The Royal Society of Chemistry 2004

|                      |          |
|----------------------|----------|
| C(131)-C(136)-C(139) | 122.4(2) |
| C(135)-C(136)-C(139) | 120.2(3) |
| N(11)-C(141)-C(142)  | 122.6(3) |
| N(11)-C(141)-C(145)  | 130.9(3) |
| C(142)-C(141)-C(145) | 106.4(2) |
| C(143)-C(142)-C(141) | 108.5(3) |
| C(142)-C(143)-C(144) | 108.4(3) |
| C(145)-C(144)-C(143) | 109.6(3) |
| C(144)-C(145)-C(141) | 107.1(3) |
| C(226)-C(221)-C(222) | 122.1(2) |
| C(226)-C(221)-N(22)  | 119.8(2) |
| C(222)-C(221)-N(22)  | 118.1(2) |
| C(223)-C(222)-C(221) | 118.0(2) |
| C(223)-C(222)-C(227) | 121.0(3) |
| C(221)-C(222)-C(227) | 121.0(2) |
| C(224)-C(223)-C(222) | 121.7(3) |
| C(225)-C(224)-C(223) | 118.2(3) |
| C(225)-C(224)-C(228) | 120.9(3) |
| C(223)-C(224)-C(228) | 120.9(3) |
| C(224)-C(225)-C(226) | 122.4(3) |
| C(221)-C(226)-C(225) | 117.5(2) |
| C(221)-C(226)-C(229) | 121.3(2) |
| C(225)-C(226)-C(229) | 121.1(2) |
| C(232)-C(231)-C(236) | 121.9(2) |
| C(232)-C(231)-N(25)  | 119.2(2) |
| C(236)-C(231)-N(25)  | 118.9(2) |
| C(233)-C(232)-C(231) | 117.8(3) |
| C(233)-C(232)-C(237) | 120.5(3) |
| C(231)-C(232)-C(237) | 121.7(3) |
| C(234)-C(233)-C(232) | 122.3(3) |
| C(233)-C(234)-C(235) | 118.1(3) |
| C(233)-C(234)-C(238) | 121.6(3) |
| C(235)-C(234)-C(238) | 120.2(3) |
| C(236)-C(235)-C(234) | 122.2(3) |
| C(235)-C(236)-C(231) | 117.8(2) |

# Supplementary Material (ESI) for Chemical Communications  
# This journal is © The Royal Society of Chemistry 2004

|                      |          |
|----------------------|----------|
| C(235)-C(236)-C(239) | 121.4(3) |
| C(231)-C(236)-C(239) | 120.8(2) |
| N(21)-C(241)-C(245)  | 131.4(2) |
| N(21)-C(241)-C(242)  | 122.0(2) |
| C(245)-C(241)-C(242) | 106.4(2) |
| C(243)-C(242)-C(241) | 108.1(2) |
| C(242)-C(243)-C(244) | 108.5(3) |
| C(245)-C(244)-C(243) | 109.7(3) |
| C(244)-C(245)-C(241) | 107.2(3) |
| C(11)-N(10)-N(11)    | 111.6(2) |
| C(141)-N(11)-N(10)   | 115.4(2) |
| C(11)-N(12)-C(13)    | 109.4(2) |
| C(11)-N(12)-C(121)   | 127.2(2) |
| C(13)-N(12)-C(121)   | 122.5(2) |
| C(11)-N(15)-C(14)    | 109.7(2) |
| C(11)-N(15)-C(131)   | 124.0(2) |
| C(14)-N(15)-C(131)   | 126.2(2) |
| C(21)-N(20)-N(21)    | 111.9(2) |
| C(241)-N(21)-N(20)   | 114.8(2) |
| C(21)-N(22)-C(23)    | 108.6(2) |
| C(21)-N(22)-C(221)   | 127.0(2) |
| C(23)-N(22)-C(221)   | 123.4(2) |
| C(21)-N(25)-C(24)    | 109.3(2) |
| C(21)-N(25)-C(231)   | 124.3(2) |
| C(24)-N(25)-C(231)   | 126.4(2) |

---

Symmetry transformations used to generate equivalent atoms:

**Table 4.** Anisotropic displacement parameters ( $\text{\AA}^2 \times 10^3$ ) for **6**. The anisotropic displacement factor exponent takes the form:  $-2\pi^2 [h^2 a^{*2} U^{11} + \dots + 2 h k a^* b^* U^{12}]$

|        | U <sup>11</sup> | U <sup>22</sup> | U <sup>33</sup> | U <sup>23</sup> | U <sup>13</sup> | U <sup>12</sup> |
|--------|-----------------|-----------------|-----------------|-----------------|-----------------|-----------------|
| C(11)  | 45(2)           | 33(1)           | 42(2)           | -10(1)          | -5(1)           | -4(1)           |
| C(13)  | 60(2)           | 49(2)           | 55(2)           | -21(2)          | -23(2)          | 9(2)            |
| C(14)  | 55(2)           | 46(2)           | 59(2)           | -18(2)          | -24(2)          | 12(1)           |
| C(21)  | 42(2)           | 35(2)           | 42(2)           | -13(1)          | -6(1)           | -4(1)           |
| C(23)  | 45(2)           | 61(2)           | 45(2)           | -9(2)           | -1(1)           | -9(2)           |
| C(24)  | 52(2)           | 58(2)           | 41(2)           | 0(1)            | -2(1)           | -12(2)          |
| C(121) | 41(2)           | 34(2)           | 42(2)           | -14(1)          | -12(1)          | -1(1)           |
| C(122) | 45(2)           | 38(2)           | 44(2)           | -12(1)          | -8(1)           | -6(1)           |
| C(123) | 41(2)           | 40(2)           | 47(2)           | -18(1)          | -7(1)           | -1(1)           |
| C(124) | 54(2)           | 32(2)           | 45(2)           | -13(1)          | -18(1)          | -1(1)           |
| C(125) | 55(2)           | 36(2)           | 46(2)           | -5(1)           | -14(1)          | -12(1)          |
| C(126) | 45(2)           | 46(2)           | 40(2)           | -11(1)          | -11(1)          | -6(1)           |
| C(127) | 72(2)           | 47(2)           | 69(2)           | -19(2)          | 9(2)            | -17(2)          |
| C(128) | 76(2)           | 36(2)           | 58(2)           | -18(1)          | -19(2)          | 2(1)            |
| C(129) | 57(2)           | 66(2)           | 53(2)           | -10(2)          | -1(2)           | -14(2)          |
| C(131) | 42(2)           | 34(2)           | 45(2)           | -13(1)          | -8(1)           | 2(1)            |
| C(132) | 45(2)           | 30(1)           | 49(2)           | -5(1)           | -7(1)           | 2(1)            |
| C(133) | 45(2)           | 45(2)           | 42(2)           | -9(1)           | -3(1)           | 2(1)            |
| C(134) | 47(2)           | 52(2)           | 52(2)           | -22(1)          | -5(1)           | -9(1)           |
| C(135) | 64(2)           | 46(2)           | 59(2)           | -17(2)          | 2(2)            | -21(2)          |
| C(136) | 50(2)           | 48(2)           | 47(2)           | -12(1)          | -1(1)           | -9(1)           |
| C(137) | 80(2)           | 40(2)           | 73(2)           | -6(2)           | 3(2)            | -9(2)           |
| C(138) | 80(2)           | 73(2)           | 76(2)           | -42(2)          | 0(2)            | -24(2)          |
| C(139) | 81(2)           | 76(2)           | 58(2)           | -18(2)          | 13(2)           | -31(2)          |
| C(141) | 45(2)           | 37(2)           | 52(2)           | -8(1)           | -10(1)          | -8(1)           |
| C(142) | 45(2)           | 55(2)           | 72(2)           | -16(2)          | -12(2)          | -4(2)           |
| C(143) | 56(2)           | 63(2)           | 97(3)           | -5(2)           | -33(2)          | -9(2)           |
| C(144) | 82(3)           | 76(2)           | 65(2)           | -5(2)           | -34(2)          | -17(2)          |
| C(145) | 65(2)           | 53(2)           | 54(2)           | -11(2)          | -16(2)          | -11(2)          |
| C(221) | 38(2)           | 40(2)           | 41(2)           | -11(1)          | -5(1)           | -3(1)           |



# Supplementary Material (ESI) for Chemical Communications  
# This journal is © The Royal Society of Chemistry 2004

|        |       |       |       |        |        |        |
|--------|-------|-------|-------|--------|--------|--------|
| C(222) | 45(2) | 46(2) | 45(2) | -14(1) | -6(1)  | -6(1)  |
| C(223) | 56(2) | 43(2) | 52(2) | -18(1) | -1(2)  | -7(1)  |
| C(224) | 40(2) | 46(2) | 49(2) | -9(1)  | -4(1)  | -1(1)  |
| C(225) | 40(2) | 56(2) | 48(2) | -14(1) | -9(1)  | -6(1)  |
| C(226) | 39(2) | 46(2) | 42(2) | -16(1) | 0(1)   | -5(1)  |
| C(227) | 70(2) | 59(2) | 69(2) | -19(2) | -21(2) | -16(2) |
| C(228) | 56(2) | 55(2) | 65(2) | -5(2)  | -8(2)  | 0(2)   |
| C(229) | 70(2) | 54(2) | 59(2) | -18(2) | -16(2) | -13(2) |
| C(231) | 45(2) | 39(2) | 34(1) | -5(1)  | -5(1)  | -2(1)  |
| C(232) | 58(2) | 40(2) | 38(2) | -7(1)  | -6(1)  | -8(1)  |
| C(233) | 64(2) | 37(2) | 49(2) | -12(1) | -9(2)  | 3(2)   |
| C(234) | 48(2) | 50(2) | 40(2) | -3(1)  | -7(1)  | 5(1)   |
| C(235) | 51(2) | 50(2) | 46(2) | -7(1)  | -10(1) | -11(1) |
| C(236) | 48(2) | 39(2) | 41(2) | -9(1)  | -9(1)  | -2(1)  |
| C(237) | 86(2) | 58(2) | 68(2) | -17(2) | -17(2) | -24(2) |
| C(238) | 63(2) | 69(2) | 75(2) | -10(2) | -7(2)  | 13(2)  |
| C(239) | 71(2) | 44(2) | 75(2) | -18(2) | -20(2) | -7(2)  |
| C(241) | 42(2) | 32(1) | 40(2) | -11(1) | -6(1)  | -5(1)  |
| C(242) | 45(2) | 42(2) | 41(2) | -10(1) | -13(1) | -4(1)  |
| C(243) | 63(2) | 52(2) | 48(2) | 1(1)   | -13(2) | -13(2) |
| C(244) | 50(2) | 87(3) | 84(3) | 25(2)  | -12(2) | -24(2) |
| C(245) | 46(2) | 68(2) | 72(2) | 15(2)  | -14(2) | -10(2) |
| N(10)  | 44(1) | 35(1) | 46(1) | -12(1) | -10(1) | -2(1)  |
| N(11)  | 41(1) | 34(1) | 50(1) | -11(1) | -5(1)  | -5(1)  |
| N(12)  | 43(1) | 39(1) | 45(1) | -13(1) | -11(1) | 3(1)   |
| N(15)  | 48(1) | 38(1) | 49(1) | -17(1) | -11(1) | 5(1)   |
| N(20)  | 44(1) | 36(1) | 39(1) | -4(1)  | -7(1)  | -2(1)  |
| N(21)  | 45(1) | 35(1) | 38(1) | -12(1) | -7(1)  | 0(1)   |
| N(22)  | 43(1) | 44(1) | 38(1) | -9(1)  | -6(1)  | -3(1)  |
| N(25)  | 43(1) | 41(1) | 42(1) | -4(1)  | -5(1)  | -5(1)  |

---

**Table 5.** Hydrogen coordinates ( $\times 10^4$ ) and isotropic displacement parameters ( $\text{\AA}^2 \times 10^3$ ) for **6**.

|        | x    | y     | z    | U(eq) |
|--------|------|-------|------|-------|
| H(13)  | 7516 | 2227  | 7222 | 66    |
| H(14)  | 8713 | 889   | 6599 | 66    |
| H(23)  | 4057 | 1863  | 2114 | 61    |
| H(24)  | 6330 | 835   | 2558 | 62    |
| H(123) | 2392 | 4521  | 7436 | 51    |
| H(125) | 5447 | 5478  | 5879 | 54    |
| H(12A) | 2502 | 2979  | 7745 | 93    |
| H(12B) | 4116 | 2367  | 7744 | 93    |
| H(12C) | 3182 | 2460  | 6981 | 93    |
| H(12D) | 4032 | 2225  | 7235 | 93    |
| H(12E) | 2417 | 2837  | 7236 | 93    |
| H(12F) | 3352 | 2744  | 7999 | 93    |
| H(12G) | 2104 | 6070  | 7190 | 85    |
| H(12H) | 2682 | 6435  | 6269 | 85    |
| H(12I) | 3598 | 6361  | 7035 | 85    |
| H(12J) | 3486 | 6508  | 6473 | 85    |
| H(12K) | 2908 | 6142  | 7394 | 85    |
| H(12L) | 1991 | 6216  | 6628 | 85    |
| H(12M) | 7512 | 4538  | 5236 | 89    |
| H(12N) | 7186 | 3687  | 4996 | 89    |
| H(12O) | 8050 | 3597  | 5788 | 89    |
| H(12P) | 7653 | 3343  | 5444 | 89    |
| H(12Q) | 7980 | 4195  | 5684 | 89    |
| H(12R) | 7115 | 4284  | 4892 | 89    |
| H(133) | 9125 | 265   | 3367 | 56    |
| H(135) | 6844 | -1209 | 5011 | 65    |
| H(13A) | 9525 | 1589  | 3654 | 100   |
| H(13B) | 9618 | 1592  | 4619 | 100   |
| H(13C) | 8196 | 2148  | 4181 | 100   |

# Supplementary Material (ESI) for Chemical Communications  
# This journal is © The Royal Society of Chemistry 2004

|        |       |       |       |     |
|--------|-------|-------|-------|-----|
| H(13D) | 8701  | 1963  | 4649  | 100 |
| H(13E) | 8608  | 1961  | 3684  | 100 |
| H(13F) | 10030 | 1404  | 4122  | 100 |
| H(13G) | 8865  | -1068 | 2993  | 108 |
| H(13H) | 7346  | -1286 | 3346  | 108 |
| H(13I) | 8789  | -1828 | 3770  | 108 |
| H(13J) | 7802  | -1720 | 3746  | 108 |
| H(13K) | 9321  | -1502 | 3394  | 108 |
| H(13L) | 7878  | -960  | 2969  | 108 |
| H(13M) | 5712  | -784  | 6300  | 106 |
| H(13N) | 5146  | 255   | 6291  | 106 |
| H(13O) | 6597  | -276  | 6712  | 106 |
| H(13P) | 5925  | 247   | 6568  | 106 |
| H(13Q) | 6491  | -792  | 6578  | 106 |
| H(13R) | 5040  | -261  | 6156  | 106 |
| H(142) | 1121  | 4017  | 5154  | 69  |
| H(143) | 52    | 4327  | 3814  | 86  |
| H(144) | 1861  | 3466  | 2773  | 88  |
| H(145) | 4039  | 2603  | 3475  | 68  |
| H(223) | 3190  | 5145  | 468   | 60  |
| H(225) | 1771  | 3571  | -733  | 57  |
| H(22A) | 4976  | 4571  | 1443  | 95  |
| H(22B) | 6178  | 3728  | 1197  | 95  |
| H(22C) | 4952  | 3614  | 1940  | 95  |
| H(22D) | 5762  | 3371  | 1610  | 95  |
| H(22E) | 4560  | 4214  | 1857  | 95  |
| H(22F) | 5786  | 4328  | 1113  | 95  |
| H(22G) | 827   | 5116  | -1072 | 93  |
| H(22H) | 1957  | 5679  | -1026 | 93  |
| H(22I) | 674   | 5632  | -303  | 93  |
| H(22J) | 1479  | 5835  | -529  | 93  |
| H(22K) | 348   | 5273  | -575  | 93  |
| H(22L) | 1631  | 5319  | -1297 | 93  |
| H(22M) | 2712  | 2017  | -555  | 89  |
| H(22N) | 3203  | 1586  | 353   | 89  |

# Supplementary Material (ESI) for Chemical Communications  
# This journal is © The Royal Society of Chemistry 2004

|        |       |       |       |     |
|--------|-------|-------|-------|-----|
| H(22O) | 4395  | 1720  | -405  | 89  |
| H(22P) | 4161  | 1531  | 150   | 89  |
| H(22Q) | 3670  | 1963  | -758  | 89  |
| H(22R) | 2478  | 1828  | 1     | 89  |
| H(233) | 11105 | -1026 | 1091  | 62  |
| H(235) | 11985 | 1092  | 1755  | 58  |
| H(23A) | 7256  | -83   | 1002  | 102 |
| H(23B) | 8243  | -1020 | 1363  | 102 |
| H(23C) | 8513  | -608  | 408   | 102 |
| H(23D) | 8752  | -1057 | 847   | 102 |
| H(23E) | 7765  | -121  | 486   | 102 |
| H(23F) | 7495  | -533  | 1441  | 102 |
| H(23G) | 13965 | -122  | 1533  | 112 |
| H(23H) | 13776 | -621  | 810   | 112 |
| H(23I) | 13588 | -1059 | 1763  | 112 |
| H(23J) | 13588 | -1080 | 1204  | 112 |
| H(23K) | 13777 | -580  | 1927  | 112 |
| H(23L) | 13964 | -142  | 974   | 112 |
| H(23M) | 8299  | 2438  | 1751  | 94  |
| H(23N) | 9839  | 2603  | 1366  | 94  |
| H(23O) | 9583  | 2253  | 2338  | 94  |
| H(23P) | 10182 | 2425  | 1885  | 94  |
| H(23Q) | 8641  | 2260  | 2271  | 94  |
| H(23R) | 8898  | 2610  | 1299  | 94  |
| H(242) | 5852  | 3897  | -1938 | 51  |
| H(243) | 7719  | 4526  | -2816 | 66  |
| H(244) | 10162 | 3826  | -2208 | 92  |
| H(245) | 9806  | 2785  | -930  | 78  |

---

**Table 1.** Crystal data and structure refinement for **7**.

|                                   |                                                               |          |
|-----------------------------------|---------------------------------------------------------------|----------|
| Identification code               | p212121                                                       |          |
| Empirical formula                 | C <sub>16</sub> H <sub>10</sub> N <sub>2</sub> S <sub>2</sub> |          |
| Formula weight                    | 294.38                                                        |          |
| Temperature                       | 100(2) K                                                      |          |
| Wavelength                        | 0.71073 Å                                                     |          |
| Crystal system                    | Orthorhombic                                                  |          |
| Space group                       | P2(1)2(1)2(1)                                                 |          |
| Unit cell dimensions              | a = 8.6383(4) Å                                               | α = 90°. |
|                                   | b = 10.1038(5) Å                                              | β = 90°. |
|                                   | c = 15.5131(7) Å                                              | γ = 90°. |
| Volume                            | 1353.98(11) Å <sup>3</sup>                                    |          |
| Z                                 | 4                                                             |          |
| Density (calculated)              | 1.444 Mg/m <sup>3</sup>                                       |          |
| Absorption coefficient            | 0.382 mm <sup>-1</sup>                                        |          |
| F(000)                            | 608                                                           |          |
| Crystal size                      | 0.30 x 0.30 x 0.30 mm <sup>3</sup>                            |          |
| Theta range for data collection   | 2.41 to 27.55°.                                               |          |
| Index ranges                      | -11 ≤ h ≤ 11, -13 ≤ k ≤ 13, -20 ≤ l ≤ 20                      |          |
| Reflections collected             | 12173                                                         |          |
| Independent reflections           | 3112 [R(int) = 0.0835]                                        |          |
| Completeness to theta = 27.55°    | 99.9 %                                                        |          |
| Absorption correction             | None                                                          |          |
| Refinement method                 | Full-matrix least-squares on F <sup>2</sup>                   |          |
| Data / restraints / parameters    | 3112 / 55 / 242                                               |          |
| Goodness-of-fit on F <sup>2</sup> | 1.211                                                         |          |
| Final R indices [I > 2σ(I)]       | R1 = 0.0482, wR2 = 0.0936                                     |          |
| R indices (all data)              | R1 = 0.0538, wR2 = 0.0974                                     |          |
| Absolute structure parameter      | 0.00(11)                                                      |          |
| Largest diff. peak and hole       | 0.275 and -0.270 e.Å <sup>-3</sup>                            |          |

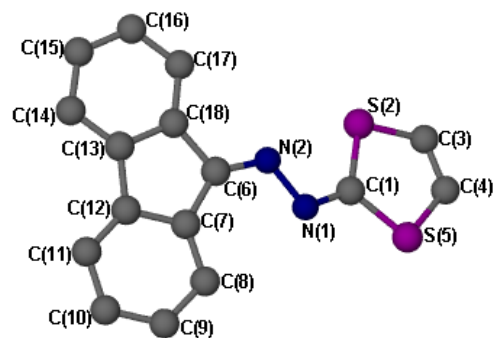

ORTEP Diagram of 7 (view 1)

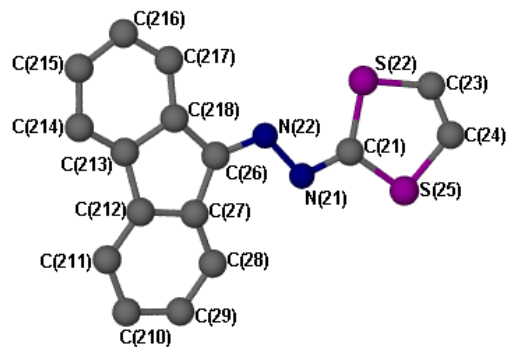

ORTEP Diagram of 7 (view 2)

These are the two components used to model the occupational disorder in the structure. The refined percentages of each component are listed below.

(75%)

(25%)

Hydrogen atoms are removed for clarity.

**Table 2.** Atomic coordinates ( $\times 10^4$ ) and equivalent isotropic displacement parameters ( $\text{\AA}^2 \times 10^3$ ) for 7.  $U(\text{eq})$  is defined as one third of the trace of the orthogonalized  $U^{ij}$  tensor.

|        | x         | y         | z         | U(eq) |
|--------|-----------|-----------|-----------|-------|
| C(1)   | 196(4)    | 8105(3)   | 8425(2)   | 19(1) |
| C(3)   | 2819(6)   | 7852(4)   | 9182(3)   | 27(1) |
| C(4)   | 3005(5)   | 7285(5)   | 8422(3)   | 24(1) |
| C(6)   | -3272(6)  | 9573(8)   | 8709(5)   | 21(1) |
| C(7)   | -4266(9)  | 9641(10)  | 7938(4)   | 21(1) |
| C(8)   | -4097(5)  | 9116(6)   | 7117(3)   | 21(1) |
| C(9)   | -5261(8)  | 9376(7)   | 6513(4)   | 29(1) |
| C(10)  | -6526(13) | 10175(17) | 6701(7)   | 35(2) |
| C(11)  | -6691(19) | 10690(20) | 7532(8)   | 28(1) |
| C(12)  | -5548(6)  | 10459(5)  | 8132(5)   | 20(1) |
| C(13)  | -5479(11) | 10789(12) | 9060(4)   | 20(1) |
| C(14)  | -6441(14) | 11558(14) | 9567(6)   | 22(1) |
| C(15)  | -6022(12) | 11733(11) | 10426(6)  | 27(1) |
| C(16)  | -4712(10) | 11187(7)  | 10780(4)  | 27(1) |
| C(17)  | -3711(9)  | 10463(6)  | 10268(4)  | 25(1) |
| C(18)  | -4101(9)  | 10262(10) | 9408(4)   | 21(1) |
| N(1)   | -1219(4)  | 8385(3)   | 8194(2)   | 26(1) |
| N(2)   | -1936(4)  | 9041(3)   | 8876(2)   | 24(1) |
| S(2)   | 1028(1)   | 8554(1)   | 9408(1)   | 25(1) |
| S(5)   | 1409(1)   | 7218(1)   | 7740(1)   | 27(1) |
| C(21)  | 249(11)   | 8363(10)  | 8926(6)   | 19(1) |
| C(23)  | 2602(15)  | 7297(18)  | 8209(10)  | 27(1) |
| C(24)  | 3055(17)  | 7542(15)  | 8999(10)  | 24(1) |
| C(26)  | -3380(20) | 9420(30)  | 8527(15)  | 21(1) |
| C(27)  | -4030(30) | 10210(30) | 9240(13)  | 21(1) |
| C(28)  | -3680(30) | 10260(20) | 10100(13) | 21(1) |
| C(29)  | -4620(40) | 10990(30) | 10652(15) | 29(1) |
| C(210) | -6010(40) | 11590(40) | 10400(20) | 35(2) |
| C(211) | -6390(50) | 11440(50) | 9530(20)  | 28(1) |
| C(212) | -5420(30) | 10810(30) | 8958(13)  | 20(1) |

# Supplementary Material (ESI) for Chemical Communications  
# This journal is © The Royal Society of Chemistry 2004

|        |           |           |          |       |
|--------|-----------|-----------|----------|-------|
| C(213) | -5740(20) | 10280(20) | 8100(14) | 20(1) |
| C(214) | -6820(60) | 10710(70) | 7510(20) | 22(1) |
| C(215) | -6710(40) | 10240(50) | 6670(18) | 27(1) |
| C(216) | -5510(20) | 9500(20)  | 6358(13) | 27(1) |
| C(217) | -4410(20) | 9160(20)  | 6948(12) | 25(1) |
| C(218) | -4370(30) | 9650(40)  | 7776(13) | 21(1) |
| N(21)  | -1105(11) | 8900(10)  | 9123(6)  | 26(1) |
| N(22)  | -2020(11) | 8880(11)  | 8400(7)  | 24(1) |
| S(22)  | 750(4)    | 7733(3)   | 7916(2)  | 25(1) |
| S(25)  | 1666(4)   | 8209(3)   | 9707(2)  | 27(1) |

---



**Table 3.** Bond lengths [Å] and angles [°] for **7**.

---

|              |           |
|--------------|-----------|
| C(1)-N(1)    | 1.306(4)  |
| C(1)-S(5)    | 1.741(3)  |
| C(1)-S(2)    | 1.745(3)  |
| C(3)-C(4)    | 1.321(6)  |
| C(3)-S(2)    | 1.738(5)  |
| C(4)-S(5)    | 1.739(4)  |
| C(6)-N(2)    | 1.299(5)  |
| C(6)-C(18)   | 1.474(6)  |
| C(6)-C(7)    | 1.475(6)  |
| C(7)-C(8)    | 1.387(7)  |
| C(7)-C(12)   | 1.415(7)  |
| C(8)-C(9)    | 1.400(6)  |
| C(9)-C(10)   | 1.390(10) |
| C(10)-C(11)  | 1.395(10) |
| C(11)-C(12)  | 1.376(9)  |
| C(12)-C(13)  | 1.478(6)  |
| C(13)-C(14)  | 1.383(8)  |
| C(13)-C(18)  | 1.411(8)  |
| C(14)-C(15)  | 1.393(9)  |
| C(15)-C(16)  | 1.374(9)  |
| C(16)-C(17)  | 1.383(7)  |
| C(17)-C(18)  | 1.391(7)  |
| N(1)-N(2)    | 1.394(4)  |
| C(21)-N(21)  | 1.324(11) |
| C(21)-S(25)  | 1.730(9)  |
| C(21)-S(22)  | 1.746(9)  |
| C(23)-C(24)  | 1.310(14) |
| C(23)-S(22)  | 1.721(12) |
| C(24)-S(25)  | 1.760(12) |
| C(26)-N(22)  | 1.312(14) |
| C(26)-C(218) | 1.461(17) |
| C(26)-C(27)  | 1.479(17) |
| C(27)-C(28)  | 1.370(18) |

# Supplementary Material (ESI) for Chemical Communications  
# This journal is © The Royal Society of Chemistry 2004

|               |           |
|---------------|-----------|
| C(27)-C(212)  | 1.413(19) |
| C(28)-C(29)   | 1.392(17) |
| C(29)-C(210)  | 1.40(2)   |
| C(210)-C(211) | 1.40(2)   |
| C(211)-C(212) | 1.38(2)   |
| C(212)-C(213) | 1.461(14) |
| C(213)-C(214) | 1.38(2)   |
| C(213)-C(218) | 1.438(19) |
| C(214)-C(215) | 1.39(2)   |
| C(215)-C(216) | 1.37(2)   |
| C(216)-C(217) | 1.365(15) |
| C(217)-C(218) | 1.380(18) |
| N(21)-N(22)   | 1.372(11) |

|                   |          |
|-------------------|----------|
| N(1)-C(1)-S(5)    | 120.5(3) |
| N(1)-C(1)-S(2)    | 124.7(3) |
| S(5)-C(1)-S(2)    | 114.8(2) |
| C(4)-C(3)-S(2)    | 117.7(4) |
| C(3)-C(4)-S(5)    | 117.6(4) |
| N(2)-C(6)-C(18)   | 118.7(5) |
| N(2)-C(6)-C(7)    | 134.3(5) |
| C(18)-C(6)-C(7)   | 107.0(4) |
| C(8)-C(7)-C(12)   | 120.1(5) |
| C(8)-C(7)-C(6)    | 131.8(5) |
| C(12)-C(7)-C(6)   | 108.0(5) |
| C(7)-C(8)-C(9)    | 117.9(5) |
| C(10)-C(9)-C(8)   | 122.2(6) |
| C(11)-C(10)-C(9)  | 119.4(7) |
| C(12)-C(11)-C(10) | 119.3(9) |
| C(11)-C(12)-C(7)  | 121.0(7) |
| C(11)-C(12)-C(13) | 130.5(8) |
| C(7)-C(12)-C(13)  | 107.9(6) |
| C(14)-C(13)-C(18) | 120.1(7) |
| C(14)-C(13)-C(12) | 131.0(7) |
| C(18)-C(13)-C(12) | 108.8(6) |

# Supplementary Material (ESI) for Chemical Communications  
# This journal is © The Royal Society of Chemistry 2004

|                      |           |
|----------------------|-----------|
| C(13)-C(14)-C(15)    | 117.4(8)  |
| C(16)-C(15)-C(14)    | 123.1(6)  |
| C(15)-C(16)-C(17)    | 119.8(6)  |
| C(16)-C(17)-C(18)    | 118.5(6)  |
| C(17)-C(18)-C(13)    | 121.1(5)  |
| C(17)-C(18)-C(6)     | 131.0(5)  |
| C(13)-C(18)-C(6)     | 107.9(5)  |
| C(1)-N(1)-N(2)       | 108.1(3)  |
| C(6)-N(2)-N(1)       | 116.1(4)  |
| C(3)-S(2)-C(1)       | 94.8(2)   |
| C(4)-S(5)-C(1)       | 94.91(19) |
| N(21)-C(21)-S(25)    | 120.0(7)  |
| N(21)-C(21)-S(22)    | 125.2(8)  |
| S(25)-C(21)-S(22)    | 114.8(5)  |
| C(24)-C(23)-S(22)    | 118.5(13) |
| C(23)-C(24)-S(25)    | 116.9(13) |
| N(22)-C(26)-C(218)   | 118.1(17) |
| N(22)-C(26)-C(27)    | 132.6(15) |
| C(218)-C(26)-C(27)   | 106.7(11) |
| C(28)-C(27)-C(212)   | 118.3(16) |
| C(28)-C(27)-C(26)    | 131.6(18) |
| C(212)-C(27)-C(26)   | 108.9(15) |
| C(27)-C(28)-C(29)    | 119.2(19) |
| C(28)-C(29)-C(210)   | 124(2)    |
| C(211)-C(210)-C(29)  | 115(2)    |
| C(212)-C(211)-C(210) | 122(2)    |
| C(211)-C(212)-C(27)  | 121.1(19) |
| C(211)-C(212)-C(213) | 130(2)    |
| C(27)-C(212)-C(213)  | 106.7(18) |
| C(214)-C(213)-C(218) | 117.8(19) |
| C(214)-C(213)-C(212) | 128(2)    |
| C(218)-C(213)-C(212) | 108.9(17) |
| C(213)-C(214)-C(215) | 118(2)    |
| C(216)-C(215)-C(214) | 125(2)    |
| C(215)-C(216)-C(217) | 116(2)    |

# Supplementary Material (ESI) for Chemical Communications  
# This journal is © The Royal Society of Chemistry 2004

|                      |           |
|----------------------|-----------|
| C(216)-C(217)-C(218) | 123.3(18) |
| C(217)-C(218)-C(213) | 117.6(16) |
| C(217)-C(218)-C(26)  | 134.3(17) |
| C(213)-C(218)-C(26)  | 105.9(14) |
| C(21)-N(21)-N(22)    | 108.3(8)  |
| C(26)-N(22)-N(21)    | 113.0(11) |
| C(23)-S(22)-C(21)    | 95.0(6)   |
| C(21)-S(25)-C(24)    | 94.6(7)   |

---

Symmetry transformations used to generate equivalent atoms:

**Table 4.** Anisotropic displacement parameters ( $\text{\AA}^2 \times 10^3$ ) for **7**. The anisotropic displacement factor exponent takes the form:  $-2\pi^2 [h^2 a^{*2} U^{11} + \dots + 2 h k a^* b^* U^{12}]$

|        | $U^{11}$ | $U^{22}$ | $U^{33}$ | $U^{23}$ | $U^{13}$ | $U^{12}$ |
|--------|----------|----------|----------|----------|----------|----------|
| C(1)   | 22(2)    | 20(2)    | 15(2)    | -3(1)    | 1(2)     | 5(1)     |
| C(3)   | 20(2)    | 28(2)    | 32(2)    | 7(2)     | -1(2)    | 0(2)     |
| C(4)   | 12(2)    | 22(2)    | 37(3)    | 1(2)     | 1(2)     | 3(2)     |
| C(6)   | 19(2)    | 16(3)    | 28(4)    | -1(2)    | -1(2)    | -4(2)    |
| C(7)   | 24(2)    | 18(2)    | 21(3)    | 7(2)     | 1(2)     | -4(2)    |
| C(8)   | 18(2)    | 20(2)    | 26(2)    | 1(2)     | -3(2)    | -2(2)    |
| C(9)   | 41(3)    | 24(2)    | 20(3)    | 3(2)     | -2(2)    | -6(2)    |
| C(10)  | 36(4)    | 32(3)    | 36(3)    | 2(2)     | -11(3)   | -10(3)   |
| C(11)  | 26(4)    | 22(3)    | 36(3)    | 4(2)     | -5(2)    | -3(3)    |
| C(12)  | 15(2)    | 14(2)    | 32(2)    | 0(2)     | 2(2)     | -12(2)   |
| C(13)  | 23(2)    | 22(2)    | 16(2)    | 4(2)     | 0(2)     | 1(2)     |
| C(14)  | 21(2)    | 19(4)    | 27(2)    | 1(2)     | 4(2)     | -1(2)    |
| C(15)  | 26(2)    | 23(3)    | 32(2)    | -3(2)    | 10(2)    | -5(2)    |
| C(16)  | 33(2)    | 27(3)    | 22(3)    | -4(2)    | 0(2)     | -9(2)    |
| C(17)  | 23(2)    | 25(3)    | 27(3)    | -5(2)    | -6(2)    | -2(2)    |
| C(18)  | 18(2)    | 22(2)    | 24(3)    | 3(3)     | 0(2)     | -3(2)    |
| N(1)   | 21(2)    | 30(2)    | 25(2)    | -4(1)    | 1(1)     | 6(1)     |
| N(2)   | 20(1)    | 28(2)    | 24(2)    | -1(2)    | 2(2)     | 3(1)     |
| S(2)   | 20(1)    | 30(1)    | 26(1)    | -2(1)    | -2(1)    | 2(1)     |
| S(5)   | 24(1)    | 30(1)    | 28(1)    | -1(1)    | 3(1)     | 7(1)     |
| C(21)  | 22(2)    | 20(2)    | 15(2)    | -3(1)    | 1(2)     | 5(1)     |
| C(23)  | 20(2)    | 28(2)    | 32(2)    | 7(2)     | -1(2)    | 0(2)     |
| C(24)  | 12(2)    | 22(2)    | 37(3)    | 1(2)     | 1(2)     | 3(2)     |
| C(26)  | 19(2)    | 16(3)    | 28(4)    | -1(2)    | -1(2)    | -4(2)    |
| C(27)  | 24(2)    | 18(2)    | 21(3)    | 7(2)     | 1(2)     | -4(2)    |
| C(28)  | 18(2)    | 20(2)    | 26(2)    | 1(2)     | -3(2)    | -2(2)    |
| C(29)  | 41(3)    | 24(2)    | 20(3)    | 3(2)     | -2(2)    | -6(2)    |
| C(210) | 36(4)    | 32(3)    | 36(3)    | 2(2)     | -11(3)   | -10(3)   |
| C(211) | 26(4)    | 22(3)    | 36(3)    | 4(2)     | -5(2)    | -3(3)    |
| C(212) | 15(2)    | 14(2)    | 32(2)    | 0(2)     | 2(2)     | -12(2)   |

# Supplementary Material (ESI) for Chemical Communications  
# This journal is © The Royal Society of Chemistry 2004

|        |       |       |       |       |       |       |
|--------|-------|-------|-------|-------|-------|-------|
| C(213) | 23(2) | 22(2) | 16(2) | 4(2)  | 0(2)  | 1(2)  |
| C(214) | 21(2) | 19(4) | 27(2) | 1(2)  | 4(2)  | -1(2) |
| C(215) | 26(2) | 23(3) | 32(2) | -3(2) | 10(2) | -5(2) |
| C(216) | 33(2) | 27(3) | 22(3) | -4(2) | 0(2)  | -9(2) |
| C(217) | 23(2) | 25(3) | 27(3) | -5(2) | -6(2) | -2(2) |
| C(218) | 18(2) | 22(2) | 24(3) | 3(3)  | 0(2)  | -3(2) |
| N(21)  | 21(2) | 30(2) | 25(2) | -4(1) | 1(1)  | 6(1)  |
| N(22)  | 20(1) | 28(2) | 24(2) | -1(2) | 2(2)  | 3(1)  |
| S(22)  | 20(1) | 30(1) | 26(1) | -2(1) | -2(1) | 2(1)  |
| S(25)  | 24(1) | 30(1) | 28(1) | -1(1) | 3(1)  | 7(1)  |

---

**Table 5.** Hydrogen coordinates ( $\times 10^4$ ) and isotropic displacement parameters ( $\text{\AA}^2 \times 10^3$ ) for **7**.

|        | x     | y     | z     | U(eq) |
|--------|-------|-------|-------|-------|
| H(3)   | 3620  | 7875  | 9582  | 32    |
| H(4)   | 3955  | 6934  | 8257  | 28    |
| H(8)   | -3238 | 8607  | 6973  | 26    |
| H(9)   | -5186 | 9002  | 5966  | 34    |
| H(10)  | -7255 | 10367 | 6279  | 42    |
| H(11)  | -7564 | 11176 | 7678  | 34    |
| H(14)  | -7333 | 11942 | 9343  | 27    |
| H(15)  | -6660 | 12244 | 10777 | 32    |
| H(16)  | -4498 | 11303 | 11363 | 32    |
| H(17)  | -2798 | 10119 | 10493 | 30    |
| H(23)  | 3266  | 6896  | 7816  | 32    |
| H(24)  | 4063  | 7372  | 9178  | 28    |
| H(28)  | -2817 | 9820  | 10313 | 26    |
| H(29)  | -4317 | 11078 | 11224 | 34    |
| H(210) | -6634 | 12062 | 10782 | 42    |
| H(211) | -7333 | 11774 | 9331  | 34    |
| H(214) | -7601 | 11302 | 7667  | 27    |
| H(215) | -7512 | 10446 | 6292  | 32    |
| H(216) | -5449 | 9252  | 5783  | 32    |
| H(217) | -3650 | 8556  | 6783  | 30    |

**Table 1.** Crystal data and structure refinement for **10**.

|                                   |                                             |                              |
|-----------------------------------|---------------------------------------------|------------------------------|
| Identification code               | l03                                         |                              |
| Empirical formula                 | C13 H8 N                                    |                              |
| Formula weight                    | 178.20                                      |                              |
| Temperature                       | 173(2) K                                    |                              |
| Wavelength                        | 0.71069 Å                                   |                              |
| Crystal system                    | Monoclinic                                  |                              |
| Space group                       | P2(1)/c                                     |                              |
| Unit cell dimensions              | a = 11.1600(4) Å                            | $\alpha = 90.000(5)^\circ$ . |
|                                   | b = 5.9650(2) Å                             | $\beta = 121.071(2)^\circ$ . |
|                                   | c = 15.3604(2) Å                            | $\gamma = 90.000(5)^\circ$ . |
| Volume                            | 875.83(4) Å <sup>3</sup>                    |                              |
| Z                                 | 4                                           |                              |
| Density (calculated)              | 1.351 Mg/m <sup>3</sup>                     |                              |
| Absorption coefficient            | 0.080 mm <sup>-1</sup>                      |                              |
| F(000)                            | 372                                         |                              |
| Crystal size                      | 0.30 x 0.30 x 0.05 mm <sup>3</sup>          |                              |
| Theta range for data collection   | 2.13 to 28.25°.                             |                              |
| Index ranges                      | 0 ≤ h ≤ 14, -7 ≤ k ≤ 0, -20 ≤ l ≤ 16        |                              |
| Reflections collected             | 2115                                        |                              |
| Independent reflections           | 2115 [R(int) = 0.0000]                      |                              |
| Completeness to theta = 28.25°    | 98.5 %                                      |                              |
| Absorption correction             | None                                        |                              |
| Max. and min. transmission        | 0.9960 and 0.9765                           |                              |
| Refinement method                 | Full-matrix least-squares on F <sup>2</sup> |                              |
| Data / restraints / parameters    | 2115 / 0 / 135                              |                              |
| Goodness-of-fit on F <sup>2</sup> | 1.087                                       |                              |
| Final R indices [I > 2σ(I)]       | R1 = 0.0726, wR2 = 0.2092                   |                              |
| R indices (all data)              | R1 = 0.1073, wR2 = 0.2470                   |                              |
| Largest diff. peak and hole       | 0.554 and -0.671 e.Å <sup>-3</sup>          |                              |



# Supplementary Material (ESI) for Chemical Communications  
# This journal is © The Royal Society of Chemistry 2004

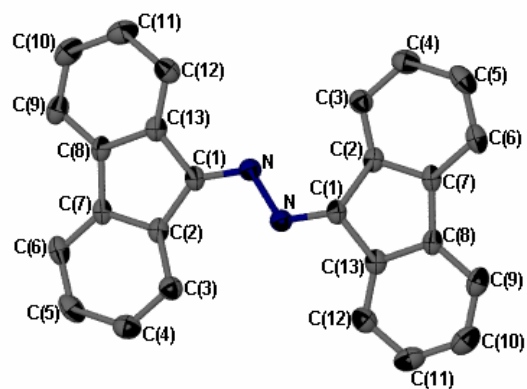

ORTEP Diagram of **10**

Hydrogen atoms are removed for clarity. Thermal ellipsoids are shown at 50% probability level.

**Table 2.** Atomic coordinates ( $\times 10^4$ ) and equivalent isotropic displacement parameters ( $\text{\AA}^2 \times 10^3$ ) for **10**.  $U(\text{eq})$  is defined as one third of the trace of the orthogonalized  $U^{ij}$  tensor.

|       | x        | y        | z       | U(eq) |
|-------|----------|----------|---------|-------|
| C(1)  | 425(3)   | 2810(4)  | 5804(2) | 30(1) |
| C(2)  | -831(3)  | 1530(4)  | 5616(2) | 31(1) |
| C(3)  | -2245(3) | 1927(5)  | 4990(2) | 37(1) |
| C(4)  | -3188(3) | 383(5)   | 4974(2) | 43(1) |
| C(5)  | -2731(3) | -1539(5) | 5570(2) | 46(1) |
| C(6)  | -1308(3) | -1966(5) | 6205(2) | 39(1) |
| C(7)  | -363(3)  | -407(4)  | 6234(2) | 30(1) |
| C(8)  | 1173(3)  | -380(4)  | 6834(2) | 31(1) |
| C(9)  | 2143(3)  | -1855(5) | 7548(2) | 42(1) |
| C(10) | 3551(4)  | -1344(6) | 8022(2) | 51(1) |
| C(11) | 4003(3)  | 611(6)   | 7798(2) | 49(1) |
| C(12) | 3054(3)  | 2103(5)  | 7084(2) | 40(1) |
| C(13) | 1642(3)  | 1593(4)  | 6602(2) | 32(1) |
| N     | 623(2)   | 4569(4)  | 5391(2) | 33(1) |

**Table 3.** Bond lengths [Å] and angles [°] for **10**.

---

|                 |          |
|-----------------|----------|
| C(1)-N          | 1.303(3) |
| C(1)-C(13)      | 1.468(4) |
| C(1)-C(2)       | 1.488(4) |
| C(2)-C(3)       | 1.380(4) |
| C(2)-C(7)       | 1.414(3) |
| C(3)-C(4)       | 1.389(4) |
| C(4)-C(5)       | 1.390(5) |
| C(5)-C(6)       | 1.392(5) |
| C(6)-C(7)       | 1.389(4) |
| C(7)-C(8)       | 1.468(4) |
| C(8)-C(9)       | 1.387(4) |
| C(8)-C(13)      | 1.407(4) |
| C(9)-C(10)      | 1.383(5) |
| C(10)-C(11)     | 1.383(5) |
| C(11)-C(12)     | 1.385(4) |
| C(12)-C(13)     | 1.385(4) |
| N-N#1           | 1.384(4) |
|                 |          |
| N-C(1)-C(13)    | 119.2(2) |
| N-C(1)-C(2)     | 134.3(2) |
| C(13)-C(1)-C(2) | 106.4(2) |
| C(3)-C(2)-C(7)  | 120.1(2) |
| C(3)-C(2)-C(1)  | 132.2(2) |
| C(7)-C(2)-C(1)  | 107.7(2) |
| C(2)-C(3)-C(4)  | 118.8(3) |
| C(3)-C(4)-C(5)  | 121.2(3) |
| C(4)-C(5)-C(6)  | 120.7(3) |
| C(7)-C(6)-C(5)  | 118.2(3) |
| C(6)-C(7)-C(2)  | 120.9(3) |
| C(6)-C(7)-C(8)  | 130.4(2) |
| C(2)-C(7)-C(8)  | 108.6(2) |
| C(9)-C(8)-C(13) | 119.4(3) |
| C(9)-C(8)-C(7)  | 132.1(2) |

# Supplementary Material (ESI) for Chemical Communications  
# This journal is © The Royal Society of Chemistry 2004

|                   |          |
|-------------------|----------|
| C(13)-C(8)-C(7)   | 108.5(2) |
| C(10)-C(9)-C(8)   | 119.2(3) |
| C(9)-C(10)-C(11)  | 121.1(3) |
| C(10)-C(11)-C(12) | 120.7(3) |
| C(11)-C(12)-C(13) | 118.5(3) |
| C(12)-C(13)-C(8)  | 121.2(3) |
| C(12)-C(13)-C(1)  | 130.2(3) |
| C(8)-C(13)-C(1)   | 108.6(2) |
| C(1)-N-N#1        | 112.0(3) |

---

Symmetry transformations used to generate equivalent atoms:

#1 -x,-y+1,-z+1

**Table 4.** Anisotropic displacement parameters ( $\text{\AA}^2 \times 10^3$ ) for **10**. The anisotropic displacement factor exponent takes the form:  $-2\pi^2 [ h^2 a^{*2} U^{11} + \dots + 2 h k a^* b^* U^{12} ]$

|       | $U^{11}$ | $U^{22}$ | $U^{33}$ | $U^{23}$ | $U^{13}$ | $U^{12}$ |
|-------|----------|----------|----------|----------|----------|----------|
| C(1)  | 41(1)    | 24(1)    | 31(1)    | -1(1)    | 22(1)    | 0(1)     |
| C(2)  | 42(1)    | 26(1)    | 28(1)    | -2(1)    | 20(1)    | 1(1)     |
| C(3)  | 38(1)    | 35(2)    | 36(1)    | -3(1)    | 19(1)    | -4(1)    |
| C(4)  | 39(2)    | 50(2)    | 40(2)    | -9(1)    | 20(1)    | -5(1)    |
| C(5)  | 55(2)    | 40(2)    | 55(2)    | -15(1)   | 37(2)    | -18(1)   |
| C(6)  | 57(2)    | 30(1)    | 42(1)    | -3(1)    | 33(1)    | -7(1)    |
| C(7)  | 47(2)    | 23(1)    | 31(1)    | -2(1)    | 26(1)    | 0(1)     |
| C(8)  | 44(1)    | 26(1)    | 29(1)    | 0(1)     | 23(1)    | 2(1)     |
| C(9)  | 57(2)    | 32(1)    | 38(1)    | 5(1)     | 26(1)    | 10(1)    |
| C(10) | 54(2)    | 51(2)    | 45(2)    | 4(1)     | 22(2)    | 17(2)    |
| C(11) | 38(2)    | 55(2)    | 48(2)    | -4(1)    | 18(1)    | 10(1)    |
| C(12) | 43(2)    | 36(2)    | 46(2)    | -7(1)    | 26(1)    | -5(1)    |
| C(13) | 43(2)    | 27(1)    | 32(1)    | -3(1)    | 23(1)    | 1(1)     |
| N     | 32(1)    | 29(1)    | 34(1)    | -2(1)    | 16(1)    | -1(1)    |

**Table 5.** Hydrogen coordinates ( $\times 10^4$ ) and isotropic displacement parameters ( $\text{\AA}^2 \times 10^3$ ) for **10**.

|       | x         | y         | z        | U(eq) |
|-------|-----------|-----------|----------|-------|
| H(3)  | -2585(12) | 3300(50)  | 4555(15) | 44    |
| H(4)  | -4210(40) | 659(11)   | 4527(16) | 52    |
| H(5)  | -3390(30) | -2560(40) | 5544(3)  | 55    |
| H(6)  | -1009(12) | -3220(50) | 6585(15) | 47    |
| H(9)  | 1816(12)  | -3320(50) | 7725(6)  | 50    |
| H(10) | 4280(30)  | -2440(40) | 8550(20) | 62    |
| H(11) | 4970(40)  | 933(15)   | 8137(14) | 59    |
| H(12) | 3360(12)  | 3430(50)  | 6931(6)  | 48    |

Atomic Coordinates for **1** (Optimized Geometry with constraints on heavy atoms)

Standard orientation:

| Center<br>Number | Atomic<br>Number | Atomic<br>Type | Coordinates (Angstroms) |           |           |
|------------------|------------------|----------------|-------------------------|-----------|-----------|
|                  |                  |                | X                       | Y         | Z         |
| 1                | 7                | 0              | 2.368957                | -1.674860 | -0.046781 |
| 2                | 7                | 0              | 0.318144                | -2.409784 | 0.077128  |
| 3                | 7                | 0              | 0.715206                | -0.000594 | -0.198569 |
| 4                | 7                | 0              | -0.600541               | 0.087208  | -0.563970 |
| 5                | 6                | 0              | 2.426974                | -3.055310 | 0.140827  |
| 6                | 6                | 0              | 1.175165                | -3.501950 | 0.216026  |
| 7                | 6                | 0              | 1.063278                | -1.273628 | -0.085966 |
| 8                | 6                | 0              | 3.489829                | -0.781746 | -0.183325 |
| 9                | 6                | 0              | 3.878324                | -0.379920 | -1.449958 |
| 10               | 6                | 0              | 4.950771                | 0.494543  | -1.546591 |
| 11               | 6                | 0              | 5.620453                | 0.962169  | -0.428836 |
| 12               | 6                | 0              | 5.198405                | 0.525882  | 0.815548  |
| 13               | 6                | 0              | 4.125485                | -0.332776 | 0.969669  |
| 14               | 6                | 0              | 3.163009                | -0.867980 | -2.680098 |
| 15               | 6                | 0              | 6.776406                | 1.930171  | -0.561723 |
| 16               | 6                | 0              | 3.648495                | -0.776515 | 2.333873  |
| 17               | 6                | 0              | -1.098353               | -2.464711 | 0.346229  |
| 18               | 6                | 0              | -1.556155               | -2.021439 | 1.580092  |
| 19               | 6                | 0              | -2.920873               | -2.081452 | 1.824386  |
| 20               | 6                | 0              | -3.811874               | -2.565838 | 0.877581  |
| 21               | 6                | 0              | -3.306675               | -3.004629 | -0.342910 |
| 22               | 6                | 0              | -1.952196               | -2.953184 | -0.636571 |
| 23               | 6                | 0              | -0.608679               | -1.432047 | 2.594761  |
| 24               | 6                | 0              | -5.296083               | -2.573244 | 1.146622  |
| 25               | 6                | 0              | -1.435031               | -3.295322 | -2.004496 |
| 26               | 6                | 0              | -1.175807               | 1.247975  | -0.408222 |
| 27               | 6                | 0              | -2.576240               | 1.441829  | -0.809096 |
| 28               | 6                | 0              | -3.481192               | 0.575868  | -1.403292 |
| 29               | 6                | 0              | -4.759282               | 1.015653  | -1.665596 |
| 30               | 6                | 0              | -5.141943               | 2.307369  | -1.335093 |
| 31               | 6                | 0              | -4.256848               | 3.179098  | -0.723655 |
| 32               | 6                | 0              | -2.959800               | 2.750472  | -0.467226 |
| 33               | 6                | 0              | -1.811488               | 3.423963  | 0.152246  |
| 34               | 6                | 0              | -1.687164               | 4.697851  | 0.684892  |
| 35               | 6                | 0              | -0.477805               | 5.073534  | 1.237859  |
| 36               | 6                | 0              | 0.591609                | 4.187449  | 1.272161  |
| 37               | 6                | 0              | 0.480966                | 2.907684  | 0.747580  |
| 38               | 6                | 0              | -0.726895               | 2.517152  | 0.180691  |
| 39               | 1                | 0              | 3.372158                | -3.572706 | 0.186102  |
| 40               | 1                | 0              | 0.783359                | -4.495866 | 0.364202  |
| 41               | 1                | 0              | 5.271707                | 0.818972  | -2.534753 |
| 42               | 1                | 0              | 5.715781                | 0.880105  | 1.705648  |
| 43               | 1                | 0              | 3.678456                | -0.538585 | -3.586980 |
| 44               | 1                | 0              | 2.138364                | -0.478545 | -2.711536 |
| 45               | 1                | 0              | 3.095204                | -1.961725 | -2.706500 |

# Supplementary Material (ESI) for Chemical Communications  
# This journal is © The Royal Society of Chemistry 2004

|    |   |   |           |           |           |
|----|---|---|-----------|-----------|-----------|
| 46 | 1 | 0 | 7.461694  | 1.855341  | 0.288900  |
| 47 | 1 | 0 | 6.419221  | 2.967612  | -0.603706 |
| 48 | 1 | 0 | 7.348752  | 1.747427  | -1.477405 |
| 49 | 1 | 0 | 4.244652  | -0.308578 | 3.123020  |
| 50 | 1 | 0 | 3.717005  | -1.863076 | 2.461801  |
| 51 | 1 | 0 | 2.600270  | -0.498455 | 2.491514  |
| 52 | 1 | 0 | -3.298608 | -1.727123 | 2.781327  |
| 53 | 1 | 0 | -3.994452 | -3.376345 | -1.100447 |
| 54 | 1 | 0 | 0.262064  | -2.076019 | 2.764432  |
| 55 | 1 | 0 | -1.111980 | -1.285684 | 3.555204  |
| 56 | 1 | 0 | -0.234278 | -0.457660 | 2.258172  |
| 57 | 1 | 0 | -5.510894 | -2.629510 | 2.218894  |
| 58 | 1 | 0 | -5.792121 | -3.418010 | 0.656079  |
| 59 | 1 | 0 | -5.764212 | -1.654994 | 0.767561  |
| 60 | 1 | 0 | -2.239934 | -3.666337 | -2.646324 |
| 61 | 1 | 0 | -0.646139 | -4.056360 | -1.983366 |
| 62 | 1 | 0 | -1.006022 | -2.401882 | -2.475145 |
| 63 | 1 | 0 | -3.174155 | -0.434472 | -1.653604 |
| 64 | 1 | 0 | -5.474669 | 0.347983  | -2.140565 |
| 65 | 1 | 0 | -6.155743 | 2.638762  | -1.548681 |
| 66 | 1 | 0 | -4.573121 | 4.186731  | -0.462621 |
| 67 | 1 | 0 | -2.524783 | 5.391476  | 0.665715  |
| 68 | 1 | 0 | -0.362927 | 6.070739  | 1.656686  |
| 69 | 1 | 0 | 1.533785  | 4.502913  | 1.714480  |
| 70 | 1 | 0 | 1.316496  | 2.218234  | 0.766916  |

---



Atomic Coordinates for **2** (Optimized Geometry with constraints on heavy atoms)  
Standard orientation:

| Center<br>Number | Atomic<br>Number | Atomic<br>Type | Coordinates (Angstroms) |           |           |
|------------------|------------------|----------------|-------------------------|-----------|-----------|
|                  |                  |                | X                       | Y         | Z         |
| 1                | 6                | 0              | -0.709613               | -2.121724 | -0.006259 |
| 2                | 6                | 0              | -1.528271               | -4.194747 | -0.013545 |
| 3                | 6                | 0              | -0.203254               | -4.298186 | 0.115068  |
| 4                | 6                | 0              | 0.542104                | 1.036875  | -0.128918 |
| 5                | 6                | 0              | -0.483514               | 2.121728  | 0.043818  |
| 6                | 6                | 0              | -1.834794               | 2.064530  | 0.209343  |
| 7                | 6                | 0              | -2.526156               | 3.268489  | 0.327041  |
| 8                | 6                | 0              | -1.891033               | 4.512804  | 0.264690  |
| 9                | 6                | 0              | -0.519650               | 4.544885  | 0.072339  |
| 10               | 6                | 0              | 0.208177                | 3.357465  | -0.050239 |
| 11               | 6                | 0              | 1.618498                | 3.100747  | -0.249175 |
| 12               | 6                | 0              | 2.701940                | 3.934738  | -0.421083 |
| 13               | 6                | 0              | -3.166902               | -2.288784 | -0.305767 |
| 14               | 6                | 0              | -3.772389               | -1.578920 | 0.733519  |
| 15               | 6                | 0              | -5.050596               | -1.048103 | 0.444275  |
| 16               | 6                | 0              | -5.688758               | -1.251774 | -0.752306 |
| 17               | 6                | 0              | -5.031994               | -1.971764 | -1.718345 |
| 18               | 6                | 0              | -3.764297               | -2.490576 | -1.503879 |
| 19               | 6                | 0              | 1.687558                | -2.731605 | 0.488137  |
| 20               | 6                | 0              | 1.964320                | -2.389041 | 1.811371  |
| 21               | 6                | 0              | 3.265410                | -2.130567 | 2.157810  |
| 22               | 6                | 0              | 4.313824                | -2.228240 | 1.241769  |
| 23               | 6                | 0              | 3.990430                | -2.561607 | -0.061979 |
| 24               | 6                | 0              | 2.682639                | -2.835337 | -0.466158 |
| 25               | 6                | 0              | 3.971991                | 3.378927  | -0.612649 |
| 26               | 6                | 0              | 4.130612                | 2.018261  | -0.615723 |
| 27               | 6                | 0              | 3.107740                | 1.157020  | -0.445336 |
| 28               | 6                | 0              | 1.819966                | 1.681353  | -0.286505 |
| 29               | 6                | 0              | -3.128348               | -1.383869 | 2.075058  |
| 30               | 6                | 0              | -7.079378               | -0.704966 | -0.977205 |
| 31               | 6                | 0              | -3.055368               | -3.245896 | -2.612021 |
| 32               | 6                | 0              | 0.830647                | -2.228625 | 2.812782  |
| 33               | 6                | 0              | 5.736862                | -1.930068 | 1.653639  |
| 34               | 6                | 0              | 2.379481                | -3.173356 | -1.880322 |
| 35               | 7                | 0              | -0.766212               | -0.753841 | -0.041015 |
| 36               | 7                | 0              | 0.462020                | -0.291258 | -0.168793 |
| 37               | 7                | 0              | -1.849706               | -2.827531 | -0.063689 |
| 38               | 7                | 0              | 0.321403                | -2.993644 | 0.122298  |
| 39               | 35               | 0              | -4.408757               | 3.210785  | 0.577578  |
| 40               | 35               | 0              | 5.880581                | 1.292025  | -0.870008 |
| 41               | 1                | 0              | -2.299194               | -4.947557 | -0.050019 |
| 42               | 1                | 0              | 0.443592                | -5.154172 | 0.221085  |
| 43               | 1                | 0              | -2.359391               | 1.119897  | 0.240828  |
| 44               | 1                | 0              | -2.466164               | 5.426684  | 0.362088  |
| 45               | 1                | 0              | -0.013774               | 5.506445  | 0.013578  |

# Supplementary Material (ESI) for Chemical Communications  
# This journal is © The Royal Society of Chemistry 2004

|    |   |   |           |           |           |
|----|---|---|-----------|-----------|-----------|
| 46 | 1 | 0 | 2.592169  | 5.016640  | -0.413209 |
| 47 | 1 | 0 | -5.546205 | -0.472093 | 1.223831  |
| 48 | 1 | 0 | -5.506600 | -2.140044 | -2.682664 |
| 49 | 1 | 0 | 3.489353  | -1.852626 | 3.186030  |
| 50 | 1 | 0 | 4.783035  | -2.627286 | -0.805277 |
| 51 | 1 | 0 | 4.829346  | 4.028512  | -0.753145 |
| 52 | 1 | 0 | 3.257859  | 0.083870  | -0.452263 |
| 53 | 1 | 0 | -2.755450 | -2.330198 | 2.484268  |
| 54 | 1 | 0 | -3.843085 | -0.964007 | 2.788661  |
| 55 | 1 | 0 | -2.274697 | -0.701534 | 2.000099  |
| 56 | 1 | 0 | -7.437728 | -0.920941 | -1.988417 |
| 57 | 1 | 0 | -7.101510 | 0.382347  | -0.836583 |
| 58 | 1 | 0 | -7.795143 | -1.138046 | -0.267850 |
| 59 | 1 | 0 | -3.583225 | -3.114026 | -3.560952 |
| 60 | 1 | 0 | -3.002128 | -4.323521 | -2.415878 |
| 61 | 1 | 0 | -2.028235 | -2.890995 | -2.746841 |
| 62 | 1 | 0 | 0.158909  | -3.094426 | 2.813948  |
| 63 | 1 | 0 | 0.229322  | -1.342814 | 2.577915  |
| 64 | 1 | 0 | 1.226518  | -2.106805 | 3.825272  |
| 65 | 1 | 0 | 5.822661  | -1.811082 | 2.737877  |
| 66 | 1 | 0 | 6.081791  | -1.001781 | 1.180844  |
| 67 | 1 | 0 | 6.421139  | -2.728730 | 1.343565  |
| 68 | 1 | 0 | 3.293237  | -3.217306 | -2.480059 |
| 69 | 1 | 0 | 1.720203  | -2.419734 | -2.330318 |
| 70 | 1 | 0 | 1.869697  | -4.139531 | -1.982434 |

---

Atomic Coordinates for **3** (Optimized geometry with constraints on heavy atoms)  
Standard orientation:

| Center<br>Number | Atomic<br>Number | Atomic<br>Type | Coordinates (Angstroms) |           |           |
|------------------|------------------|----------------|-------------------------|-----------|-----------|
|                  |                  |                | X                       | Y         | Z         |
| 1                | 6                | 0              | -0.247436               | -0.592010 | 0.133922  |
| 2                | 6                | 0              | 0.321165                | -2.750046 | 0.294743  |
| 3                | 6                | 0              | -1.003415               | -2.701351 | 0.230405  |
| 4                | 6                | 0              | 2.205598                | -1.150455 | 0.073212  |
| 5                | 6                | 0              | 2.970697                | -0.920168 | 1.192226  |
| 6                | 6                | 0              | 4.326012                | -0.689464 | 0.995440  |
| 7                | 6                | 0              | 4.892288                | -0.702815 | -0.262254 |
| 8                | 6                | 0              | 4.086464                | -0.961567 | -1.342676 |
| 9                | 6                | 0              | 2.724656                | -1.206652 | -1.204466 |
| 10               | 6                | 0              | 2.368677                | -0.914674 | 2.558536  |
| 11               | 6                | 0              | 6.364561                | -0.415404 | -0.445385 |
| 12               | 6                | 0              | 1.870152                | -1.539268 | -2.390640 |
| 13               | 6                | 0              | -2.709708               | -0.859555 | 0.035176  |
| 14               | 6                | 0              | -3.219987               | -0.590397 | -1.216022 |
| 15               | 6                | 0              | -4.495160               | -0.037259 | -1.281611 |
| 16               | 6                | 0              | -5.236197               | 0.212837  | -0.145676 |
| 17               | 6                | 0              | -4.695969               | -0.097141 | 1.077941  |
| 18               | 6                | 0              | -3.413645               | -0.633404 | 1.197820  |
| 19               | 6                | 0              | -2.454510               | -0.900408 | -2.463450 |
| 20               | 6                | 0              | -6.610772               | 0.833507  | -0.224281 |
| 21               | 6                | 0              | -2.857576               | -0.966577 | 2.554438  |
| 22               | 6                | 0              | 0.870307                | 2.612647  | 0.185050  |
| 23               | 6                | 0              | 1.985904                | 3.423843  | 0.602781  |
| 24               | 6                | 0              | 1.766167                | 4.675439  | 0.213008  |
| 25               | 6                | 0              | 0.504261                | 4.719633  | -0.484735 |
| 26               | 6                | 0              | -0.041088               | 3.496010  | -0.505290 |
| 27               | 7                | 0              | -0.324754               | 0.720076  | 0.005283  |
| 28               | 7                | 0              | 0.814719                | 1.326235  | 0.402915  |
| 29               | 7                | 0              | 0.798442                | -1.455019 | 0.238441  |
| 30               | 7                | 0              | -1.363840               | -1.373480 | 0.128177  |
| 31               | 1                | 0              | 0.997183                | -3.586254 | 0.381600  |
| 32               | 1                | 0              | -1.745432               | -3.483986 | 0.249011  |
| 33               | 1                | 0              | 4.954498                | -0.500802 | 1.863895  |
| 34               | 1                | 0              | 4.521627                | -0.993087 | -2.340064 |
| 35               | 1                | 0              | 1.800244                | -1.829040 | 2.765129  |
| 36               | 1                | 0              | 1.675202                | -0.070227 | 2.657911  |
| 37               | 1                | 0              | 3.139972                | -0.816022 | 3.328435  |
| 38               | 1                | 0              | 6.756471                | -0.885741 | -1.353351 |
| 39               | 1                | 0              | 6.953240                | -0.776104 | 0.405015  |
| 40               | 1                | 0              | 6.547768                | 0.663686  | -0.532278 |
| 41               | 1                | 0              | 1.368220                | -2.507430 | -2.278134 |
| 42               | 1                | 0              | 2.472601                | -1.578544 | -3.303028 |

# Supplementary Material (ESI) for Chemical Communications  
# This journal is © The Royal Society of Chemistry 2004

|    |   |   |           |           |           |
|----|---|---|-----------|-----------|-----------|
| 43 | 1 | 0 | 1.085298  | -0.787879 | -2.543942 |
| 44 | 1 | 0 | -4.918869 | 0.186081  | -2.258718 |
| 45 | 1 | 0 | -5.272833 | 0.082424  | 1.982889  |
| 46 | 1 | 0 | -2.121292 | -1.944410 | -2.491492 |
| 47 | 1 | 0 | -1.558067 | -0.272236 | -2.538956 |
| 48 | 1 | 0 | -3.066166 | -0.718706 | -3.351976 |
| 49 | 1 | 0 | -7.266440 | 0.456039  | 0.567582  |
| 50 | 1 | 0 | -7.091578 | 0.632096  | -1.187399 |
| 51 | 1 | 0 | -6.557520 | 1.924182  | -0.109261 |
| 52 | 1 | 0 | -2.612887 | -2.031489 | 2.648974  |
| 53 | 1 | 0 | -3.577069 | -0.717734 | 3.339496  |
| 54 | 1 | 0 | -1.934723 | -0.408796 | 2.754626  |
| 55 | 1 | 0 | 2.839200  | 3.032266  | 1.144441  |
| 56 | 1 | 0 | 2.415023  | 5.529865  | 0.374639  |
| 57 | 1 | 0 | 0.075557  | 5.616415  | -0.922742 |
| 58 | 1 | 0 | -0.979869 | 3.188945  | -0.945280 |

---

# Supplementary Material (ESI) for Chemical Communications  
# This journal is © The Royal Society of Chemistry 2004

Atomic Coordinates for **4** (optimized geometry with constraints on heavy atoms)

| Center<br>Number | Atomic<br>Number | Atomic<br>Type | Coordinates (Angstroms) |           |           |
|------------------|------------------|----------------|-------------------------|-----------|-----------|
|                  |                  |                | X                       | Y         | Z         |
| 1                | 6                | 0              | 1.759289                | 0.059013  | -0.021667 |
| 2                | 6                | 0              | 3.701759                | -1.077461 | -0.023623 |
| 3                | 6                | 0              | 3.994086                | 0.217706  | -0.188741 |
| 4                | 6                | 0              | -1.677599               | -0.095301 | -0.160362 |
| 5                | 6                | 0              | -2.300500               | 1.208521  | 0.109911  |
| 6                | 6                | 0              | -1.770134               | 2.485722  | 0.272669  |
| 7                | 6                | 0              | -2.637314               | 3.551236  | 0.489765  |
| 8                | 6                | 0              | -4.006415               | 3.354155  | 0.538636  |
| 9                | 6                | 0              | -4.549147               | 2.097345  | 0.368298  |
| 10               | 6                | 0              | -3.702640               | 1.022992  | 0.156431  |
| 11               | 6                | 0              | -3.993271               | -0.393769 | -0.086698 |
| 12               | 6                | 0              | -5.191382               | -1.097739 | -0.115286 |
| 13               | 6                | 0              | 1.571960                | -2.370327 | 0.637610  |
| 14               | 6                | 0              | 2.117741                | -2.791786 | 1.988132  |
| 15               | 6                | 0              | 1.517699                | -3.496198 | -0.374687 |
| 16               | 6                | 0              | 4.629567                | -2.250147 | -0.092210 |
| 17               | 6                | 0              | 5.335806                | 0.849595  | -0.369097 |
| 18               | 6                | 0              | 2.571812                | 2.384700  | -0.299663 |
| 19               | 6                | 0              | 3.068825                | 3.124661  | 0.877835  |
| 20               | 6                | 0              | 2.833835                | 2.912843  | -1.638973 |
| 21               | 6                | 0              | -5.159215               | -2.448729 | -0.401963 |
| 22               | 6                | 0              | -3.955806               | -3.104670 | -0.652166 |
| 23               | 6                | 0              | -2.754205               | -2.418916 | -0.588913 |
| 24               | 6                | 0              | -2.769766               | -1.055101 | -0.307742 |
| 25               | 7                | 0              | 2.302330                | -1.191551 | 0.107675  |
| 26               | 7                | 0              | 2.793828                | 0.925932  | -0.177527 |
| 27               | 7                | 0              | 0.495689                | 0.507911  | -0.026566 |
| 28               | 7                | 0              | -0.423033               | -0.463078 | -0.236855 |
| 29               | 1                | 0              | -0.699704               | 2.634736  | 0.242204  |
| 30               | 1                | 0              | -2.232435               | 4.552104  | 0.621141  |
| 31               | 1                | 0              | -4.664596               | 4.203862  | 0.707233  |
| 32               | 1                | 0              | -5.627262               | 1.955273  | 0.399677  |
| 33               | 1                | 0              | -6.137886               | -0.595837 | 0.071950  |
| 34               | 1                | 0              | 0.554980                | -2.009029 | 0.769835  |
| 35               | 1                | 0              | 3.088432                | -3.291721 | 1.933515  |
| 36               | 1                | 0              | 1.420686                | -3.501153 | 2.449758  |
| 37               | 1                | 0              | 2.208778                | -1.933799 | 2.662639  |
| 38               | 1                | 0              | 1.106859                | -3.135803 | -1.322762 |
| 39               | 1                | 0              | 0.859762                | -4.290491 | -0.002510 |
| 40               | 1                | 0              | 2.495517                | -3.948518 | -0.565777 |
| 41               | 1                | 0              | 5.645093                | -1.904779 | -0.299759 |
| 42               | 1                | 0              | 4.353364                | -2.936712 | -0.899781 |
| 43               | 1                | 0              | 4.674107                | -2.830775 | 0.833932  |

# Supplementary Material (ESI) for Chemical Communications  
# This journal is © The Royal Society of Chemistry 2004

|    |   |   |           |           |           |
|----|---|---|-----------|-----------|-----------|
| 44 | 1 | 0 | 6.114537  | 0.084618  | -0.381403 |
| 45 | 1 | 0 | 5.577230  | 1.543842  | 0.444206  |
| 46 | 1 | 0 | 5.412002  | 1.409217  | -1.308689 |
| 47 | 1 | 0 | 1.480367  | 2.414104  | -0.204452 |
| 48 | 1 | 0 | 4.163085  | 3.193557  | 0.933820  |
| 49 | 1 | 0 | 2.713657  | 2.663014  | 1.804442  |
| 50 | 1 | 0 | 2.691853  | 4.154438  | 0.856298  |
| 51 | 1 | 0 | 3.898127  | 2.954763  | -1.907549 |
| 52 | 1 | 0 | 2.452617  | 3.938393  | -1.714953 |
| 53 | 1 | 0 | 2.320968  | 2.316254  | -2.400143 |
| 54 | 1 | 0 | -6.089750 | -3.010795 | -0.439632 |
| 55 | 1 | 0 | -3.961201 | -4.167303 | -0.882646 |
| 56 | 1 | 0 | -1.810803 | -2.926034 | -0.772663 |

---

# Supplementary Material (ESI) for Chemical Communications  
# This journal is © The Royal Society of Chemistry 2004

Atomic Coordinates for **5** (optimized geometry with constraints on heavy atoms)

Standard orientation:

| Center<br>Number | Atomic<br>Number | Atomic<br>Type | Coordinates (Angstroms) |           |           |
|------------------|------------------|----------------|-------------------------|-----------|-----------|
|                  |                  |                | X                       | Y         | Z         |
| 1                | 6                | 0              | -1.666555               | -0.099723 | 0.000235  |
| 2                | 7                | 0              | -0.528103               | 0.476287  | -0.000338 |
| 3                | 7                | 0              | 0.528113                | -0.476294 | -0.000339 |
| 4                | 6                | 0              | 1.666546                | 0.099727  | 0.000238  |
| 5                | 1                | 0              | -1.778545               | -1.187129 | 0.000688  |
| 6                | 1                | 0              | -2.555958               | 0.527329  | 0.000268  |
| 7                | 1                | 0              | 2.555961                | -0.527309 | 0.000259  |
| 8                | 1                | 0              | 1.778522                | 1.187134  | 0.000682  |

Atomic Coordinates for **6** (optimized geometry with constraints on heavy atoms)

Standard orientation:

| Center<br>Number | Atomic<br>Number | Atomic<br>Type | Coordinates (Angstroms) |           |           |
|------------------|------------------|----------------|-------------------------|-----------|-----------|
|                  |                  |                | X                       | Y         | Z         |
| 1                | 7                | 0              | -0.666263               | 0.138561  | -0.443528 |
| 2                | 7                | 0              | 0.675122                | -0.268828 | -0.411413 |
| 3                | 6                | 0              | -1.508260               | -0.704572 | 0.018346  |
| 4                | 6                | 0              | -2.939001               | -0.290798 | -0.027466 |
| 5                | 6                | 0              | -3.950063               | -1.098872 | 0.475067  |
| 6                | 6                | 0              | -5.273656               | -0.682379 | 0.471598  |
| 7                | 6                | 0              | -5.601072               | 0.552035  | -0.052448 |
| 8                | 6                | 0              | -4.604289               | 1.363733  | -0.579800 |
| 9                | 6                | 0              | -3.294993               | 0.949925  | -0.559856 |
| 10               | 6                | 0              | -1.144319               | -2.035634 | 0.599856  |
| 11               | 6                | 0              | 1.499090                | 0.643128  | -0.059196 |
| 12               | 6                | 0              | 2.939231                | 0.276094  | -0.056488 |
| 13               | 6                | 0              | 3.865038                | 0.990350  | 0.687904  |
| 14               | 6                | 0              | 5.197500                | 0.616450  | 0.724482  |
| 15               | 6                | 0              | 5.629274                | -0.472770 | -0.010952 |
| 16               | 6                | 0              | 4.722575                | -1.185778 | -0.769983 |
| 17               | 6                | 0              | 3.391166                | -0.826923 | -0.790145 |
| 18               | 6                | 0              | 1.087221                | 2.021014  | 0.366513  |
| 19               | 1                | 0              | -3.711000               | -2.069514 | 0.898985  |
| 20               | 1                | 0              | -6.044451               | -1.329907 | 0.881135  |
| 21               | 1                | 0              | -6.635787               | 0.886385  | -0.058461 |
| 22               | 1                | 0              | -4.859058               | 2.333537  | -1.000049 |
| 23               | 1                | 0              | -2.511819               | 1.583673  | -0.961043 |
| 24               | 1                | 0              | -0.093552               | -2.253698 | 0.409492  |
| 25               | 1                | 0              | -1.761472               | -2.832382 | 0.170164  |
| 26               | 1                | 0              | -1.309926               | -2.050501 | 1.685026  |
| 27               | 1                | 0              | 3.543925                | 1.845972  | 1.275450  |
| 28               | 1                | 0              | 5.900553                | 1.184826  | 1.327900  |
| 29               | 1                | 0              | 6.676726                | -0.763725 | 0.007650  |
| 30               | 1                | 0              | 5.056209                | -2.039282 | -1.355549 |
| 31               | 1                | 0              | 2.673190                | -1.390499 | -1.376601 |
| 32               | 1                | 0              | 0.966511                | 2.079185  | 1.456829  |
| 33               | 1                | 0              | 0.122624                | 2.270097  | -0.078678 |
| 34               | 1                | 0              | 1.832659                | 2.767688  | 0.077748  |



Atomic Coordinates for **7** (optimized geometry with constraints on heavy atoms)  
Standard orientation:

| Center<br>Number | Atomic<br>Number | Atomic<br>Type | Coordinates (Angstroms) |           |           |
|------------------|------------------|----------------|-------------------------|-----------|-----------|
|                  |                  |                | X                       | Y         | Z         |
| 1                | 35               | 0              | 6.715102                | -0.331633 | -0.115791 |
| 2                | 7                | 0              | -0.078367               | -0.091937 | -0.355515 |
| 3                | 7                | 0              | -1.449326               | 0.177471  | -0.334515 |
| 4                | 8                | 0              | -7.823058               | 0.004401  | 0.014034  |
| 5                | 6                | 0              | 0.638422                | 0.843338  | 0.068164  |
| 6                | 6                | 0              | 2.119872                | 0.605885  | 0.011184  |
| 7                | 6                | 0              | 3.002782                | 1.394112  | 0.738182  |
| 8                | 6                | 0              | 4.374255                | 1.146452  | 0.712647  |
| 9                | 6                | 0              | 4.846128                | 0.084895  | -0.031923 |
| 10               | 6                | 0              | 4.006931                | -0.719437 | -0.773693 |
| 11               | 6                | 0              | 2.645284                | -0.447912 | -0.732110 |
| 12               | 6                | 0              | 0.136457                | 2.123907  | 0.647527  |
| 13               | 6                | 0              | -2.210952               | -0.785070 | 0.075662  |
| 14               | 6                | 0              | -3.674595               | -0.535711 | 0.064589  |
| 15               | 6                | 0              | -4.556967               | -1.464644 | 0.645071  |
| 16               | 6                | 0              | -5.917290               | -1.244845 | 0.620559  |
| 17               | 6                | 0              | -6.425222               | -0.118749 | 0.008496  |
| 18               | 6                | 0              | -5.561096               | 0.810847  | -0.558369 |
| 19               | 6                | 0              | -4.198768               | 0.598744  | -0.535870 |
| 20               | 6                | 0              | -1.674156               | -2.108181 | 0.567566  |
| 21               | 6                | 0              | -8.397589               | 0.972958  | -0.501650 |
| 22               | 1                | 0              | 2.640892                | 2.219544  | 1.342787  |
| 23               | 1                | 0              | 5.058604                | 1.765738  | 1.282350  |
| 24               | 1                | 0              | 4.395780                | -1.540677 | -1.364143 |
| 25               | 1                | 0              | 1.958769                | -1.069948 | -1.297749 |
| 26               | 1                | 0              | -0.892586               | 2.297373  | 0.329934  |
| 27               | 1                | 0              | 0.141878                | 2.088643  | 1.745363  |
| 28               | 1                | 0              | 0.760766                | 2.970338  | 0.345158  |
| 29               | 1                | 0              | -4.176274               | -2.356471 | 1.129960  |
| 30               | 1                | 0              | -6.608923               | -1.953209 | 1.066917  |
| 31               | 1                | 0              | -5.957017               | 1.701173  | -1.037193 |
| 32               | 1                | 0              | -3.524573               | 1.316327  | -0.989454 |
| 33               | 1                | 0              | -0.630836               | -2.215629 | 0.269667  |
| 34               | 1                | 0              | -1.723572               | -2.171543 | 1.662611  |
| 35               | 1                | 0              | -2.256025               | -2.943770 | 0.165524  |
| 36               | 1                | 0              | -8.146932               | 1.963341  | -0.055381 |
| 37               | 1                | 0              | -8.223673               | 1.097854  | -1.595608 |
| 38               | 1                | 0              | -9.487489               | 0.864584  | -0.386309 |

# Supplementary Material (ESI) for Chemical Communications  
# This journal is © The Royal Society of Chemistry 2004

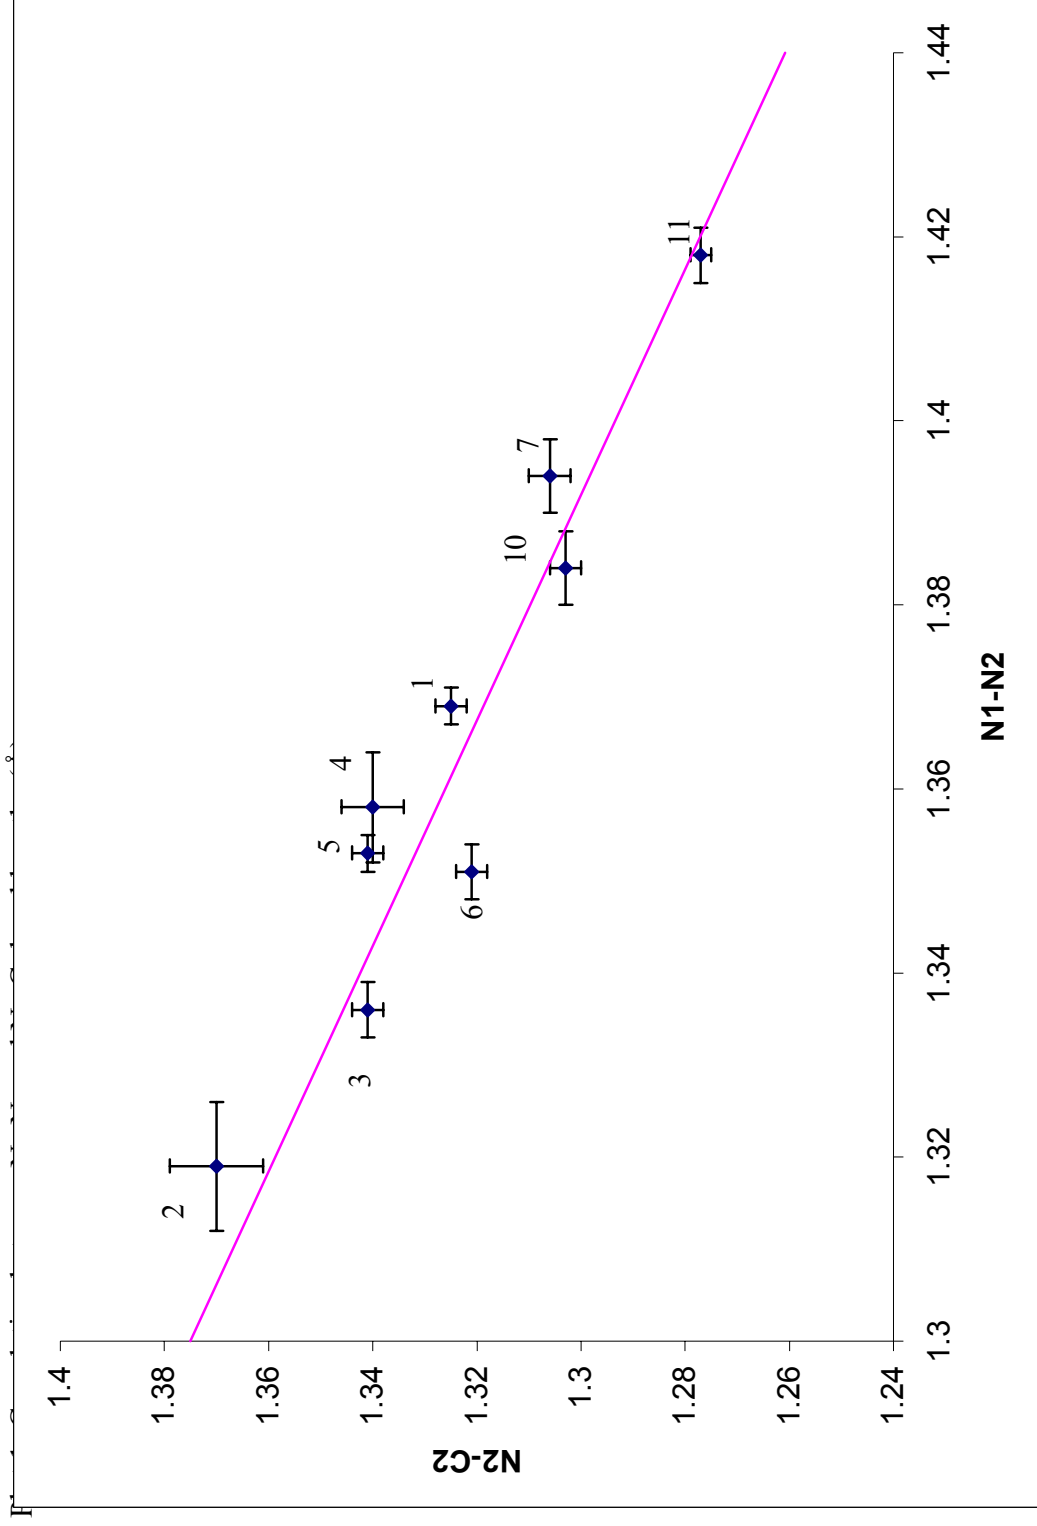

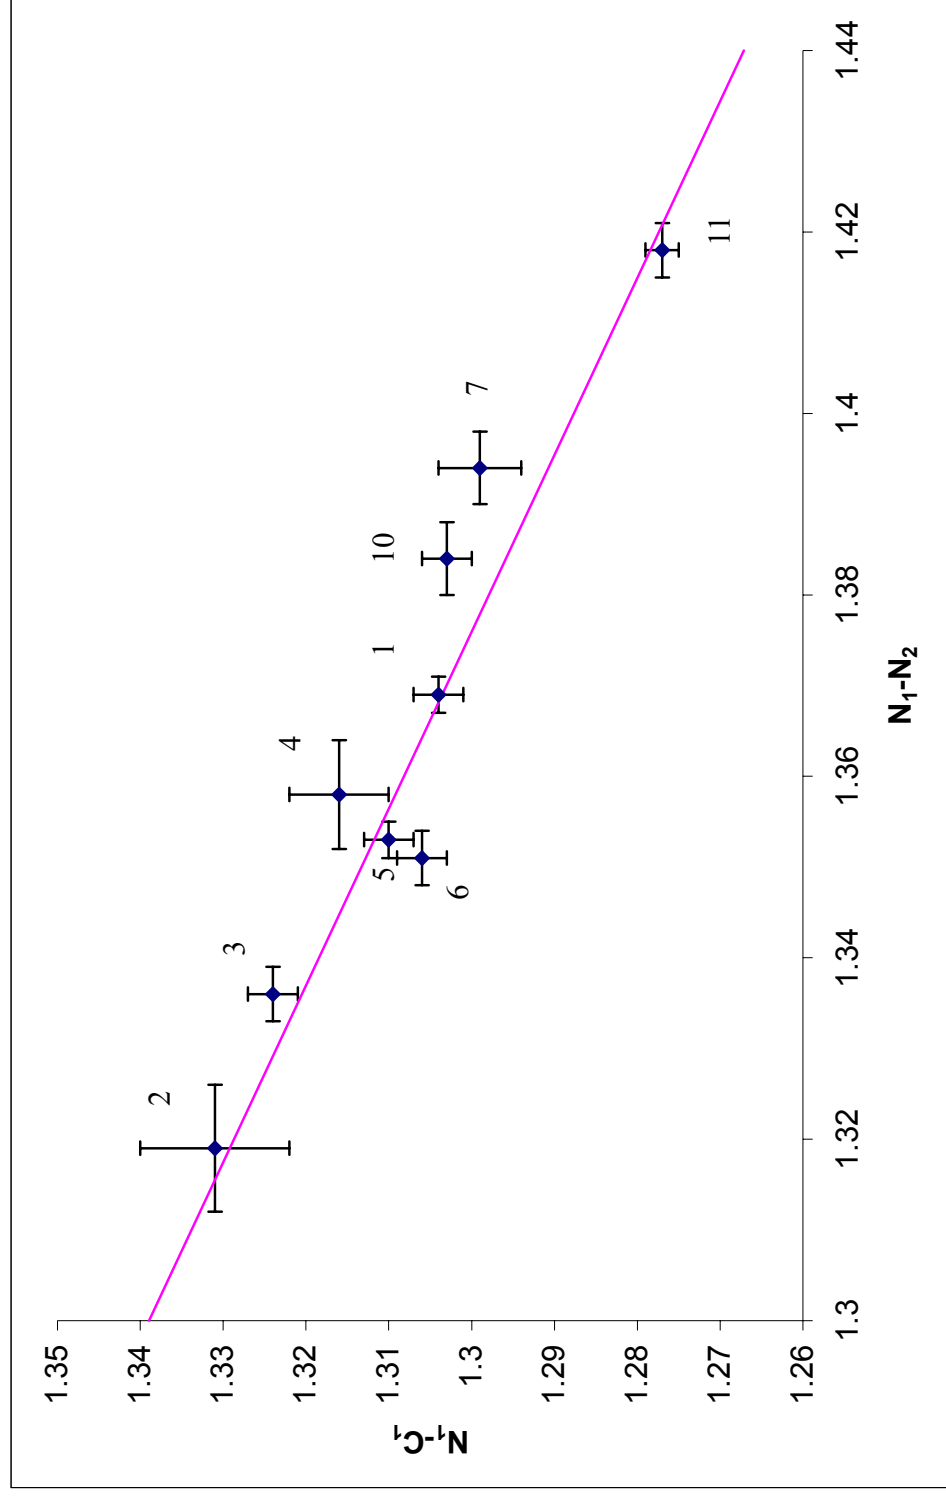

Plot 2: Correlation between N<sub>1</sub>-N<sub>2</sub> and N<sub>1</sub>-C<sub>1</sub> bond lengths (Å).

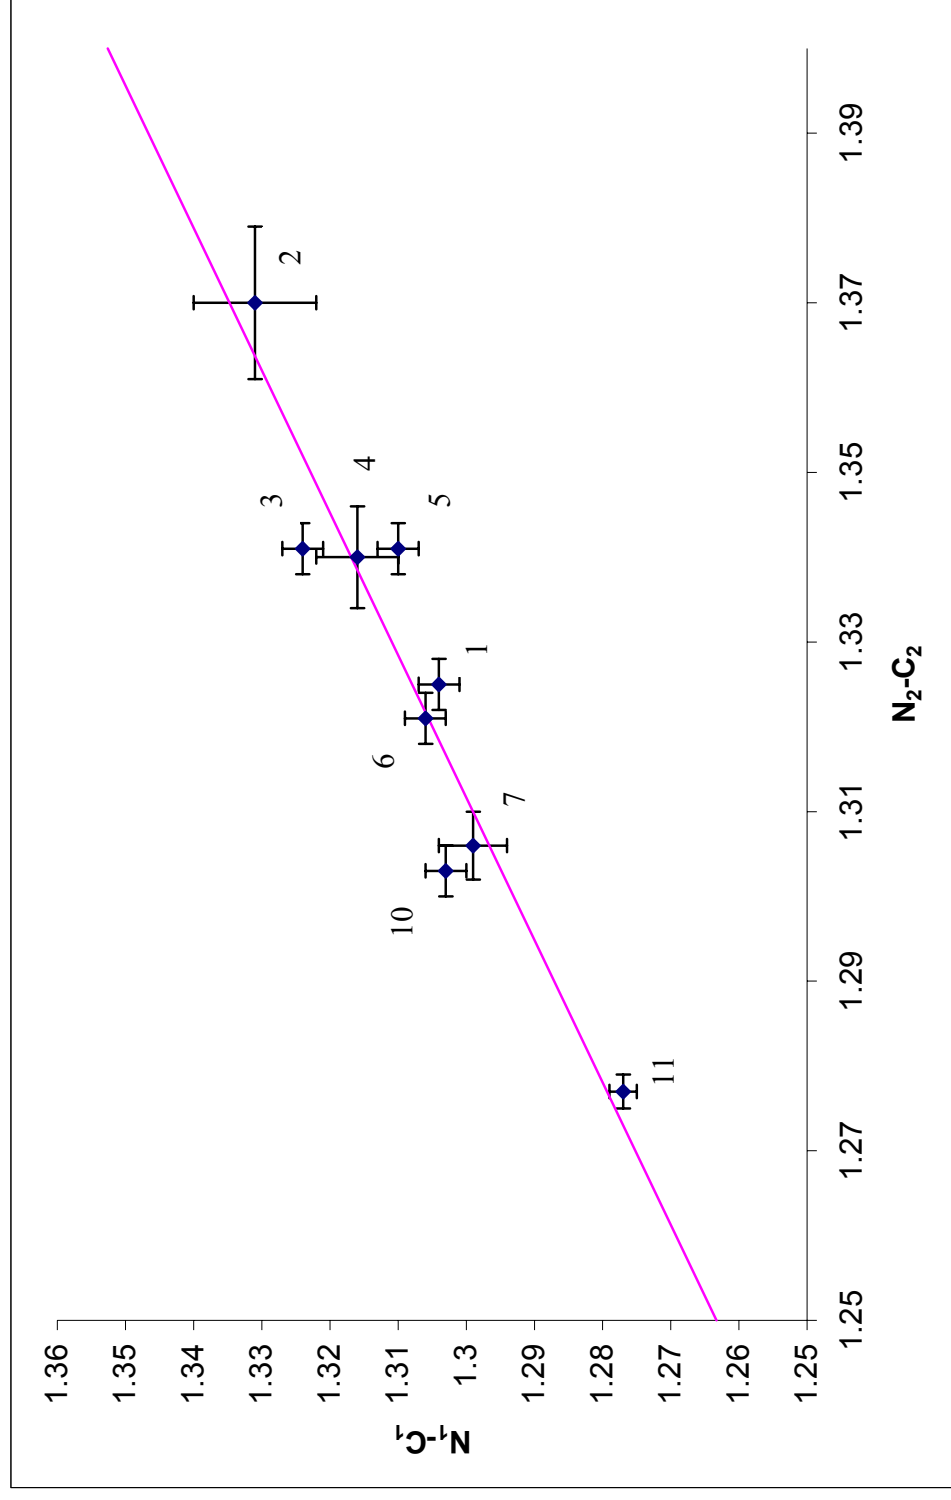

Plot 3: Correlation between  $N_2-C_2$  and  $N_1-C_1$  bond lengths (Å)

**Surface Second Harmonic Generation studies:**

Surface SHG experiments were conducted on spin cast films of submonolayer coverage in a total internal reflection geometry. Experiments were conducted under nonresonant conditions with a fundamental frequency of 1300 nm, and SHG detection at 650 nm to avoid resonantly enhanced signals that would skew the relative ranking of the second order response. Kikteva, T.; Star, D.; Zhao, Z.; Baisley, T. L.; Leach, G. W. *J. Phys. Chem. B* 1999, 103, 1124-1133.

Note that direct comparison of the calculated  $\beta_{\text{tot}}$  values with experimental surface SHG intensities are complicated since the calculated  $\beta_{\text{tot}}$  values are a measure of the total intrinsic quadratic hyperpolarizability and represent a sum of hyperpolarizability tensor components, while the surface SHG results reflect the macroscopic, orientation-averaged nonlinear susceptibilities which weight various components of the hyperpolarizability tensor according to their orientation at the surface. Nevertheless, both experiment and calculation show similar trends. (T. Kikteva, D. Star, G. W. Leach, *J. Phys. Chem. B*, 2000, **104**, 2860)

Table.1 Hyperpolarisability Calculations at B3LYP/6-31+G\* level (for 6-31G\* optimised molecular geometry)

| Compounds | Dipole Moment ( $\mu$ ) in D (in $10^{-18}$ esu) | $\beta_{\text{tot}}/\text{esu}$<br>( $10^{-30}$ ) | $\beta_{\text{vec}}/\text{esu}$<br>( $10^{-30}$ ) | $\mu\beta_{\text{vec}}$<br>( $10^{-48}$ ) |
|-----------|--------------------------------------------------|---------------------------------------------------|---------------------------------------------------|-------------------------------------------|
| 1         | 5.12 (2.02)                                      | 28.7                                              | -28.3                                             | -57.0                                     |
| 2         | 5.21 (2.05)                                      | 30.9                                              | -30.7                                             | -63.0                                     |
| 3         | 5.53 (2.18)                                      | 26.0                                              | -25.0                                             | -54.5                                     |
| 4         | 5.30 (2.09)                                      | 28.7                                              | -28.5                                             | -59.5                                     |
| 6         | 5.30 (2.09)                                      | 20.1                                              | -19.7                                             | -41.2                                     |
| 5         | 6.73 (2.65)                                      | 45.5                                              | -45.3                                             | -120.0                                    |
| 7         | 1.85 (0.73)                                      | 17.7                                              | -14.9                                             | -10.8                                     |
